# Supplementary material
Source: PubMed Central journal article supplement (PMC3621123)

## Supporting Information

# Non-nucleoside Inhibitors of BasE, An Adenylating Enzyme in the Siderophore Biosynthetic Pathway of the Opportunistic Pathogen *Acinetobacter baumannii*

João Neres,<sup>1,†</sup> Curtis A. Engelhart,<sup>1,2</sup> Eric J. Drake,<sup>3</sup> Daniel J. Wilson,<sup>1</sup> Peng Fu,<sup>1</sup> Helena I. Boshoff,<sup>4</sup> Clifton E. Barry,<sup>3rd, 4</sup> Andrew M. Gulick,<sup>3</sup> Courtney C. Aldrich<sup>1\*</sup>

<sup>1</sup>Center for Drug Design, Academic Health Center, University of Minnesota, Minneapolis, Minnesota 55455, United States, <sup>2</sup>Department of Medicinal Chemistry, University of Minnesota, Minneapolis, Minnesota 55455, United States <sup>3</sup>Hauptman-Woodward Institute and Department of Structural Biology, University at Buffalo, Buffalo, New York 14203-1102, United States, and <sup>4</sup>Tuberculosis Research Section, National Institute of Allergy and Infectious Diseases, Bethesda, Maryland 20892, United States.

**Preparative reverse-phase HPLC conditions:**

mobile phases:

solvent A: 10 mM  $\text{NH}_4\text{HCO}_3$

solvent B: MeOH

Elution with solvent A and a linear gradient of solvent B

Method 1: 20 to 60% of B in 20 min;

Method 2: 40-100% of B in 20 min;

Method 3: 20-80% of B in 20 min;

Method 4: 20-60% of B in 15 min;

Method 5: 10-40% of B in 15 min;

Method 6: 30-60% of B in 20 min;

Method 7: 10-80% of B in 30 min.

Method 8: 10-40% of B in 20 min

## Experimental Procedures and Data for Compounds 23–25, 27–28, 37–41, 43–62, 66–90.

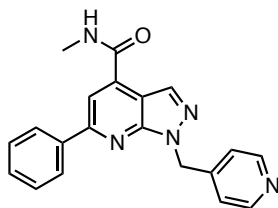

### ***N*-Methyl-6-phenyl-1-(pyridin-4-ylmethyl)-1*H*-pyrazolo[3,4-*b*]pyridine-4-carboxamide**

(23). The title compound was prepared using the general procedure for the synthesis of 4-carboxamide analogues, using a 2 M methylamine solution in THF (300  $\mu$ L, 0.60 mmol, 12 equiv). Purification by preparative reverse-phase HPLC using method 2 afforded the title compound (9.7 mg, 56%) as a white solid:  $R_T$  13.7 min;  $^1\text{H}$  NMR (600 MHz,  $\text{CD}_3\text{OD}$ )  $\delta$  3.04 (s, 3H), 5.87 (s, 2H), 7.31 (d,  $J = 6.0$  Hz, 2H), 7.48 (t,  $J = 7.2$  Hz, 1H), 7.52 (t,  $J = 7.2$  Hz, 2H), 8.09 (s, 1H), 8.21 (d,  $J = 7.2$  Hz, 2H), 8.43 (s, 1H), 8.47 (d,  $J = 6.0$  Hz, 2H);  $^{13}\text{C}$  NMR (150 MHz,  $\text{CD}_3\text{OD}$ )  $\delta$  26.9, 50.4, 113.1, 113.8, 124.2, 128.6, 130.0, 131.1, 134.6, 138.6, 139.7, 149.0, 150.4, 153.0, 159.0, 168.2; HRMS (ESI $^-$ ) calcd for  $\text{C}_{20}\text{H}_{18}\text{N}_5\text{O}$  [ $\text{M} + \text{H}$ ] $^+$  344.1511, found 344.1504 (error 2.0 ppm).

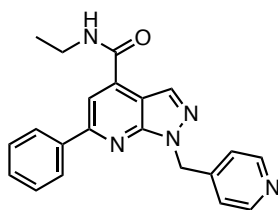

### ***N*-Ethyl-6-phenyl-1-(pyridin-4-ylmethyl)-1*H*-pyrazolo[3,4-*b*]pyridine-4-carboxamide**

(24). The title compound was prepared using the general procedure for the synthesis of 4-carboxamide analogues, using a 70% (w/w) ethylamine solution in water (202  $\mu$ L, 0.25 mmol, 5.6 equiv). Purification by preparative reverse-phase HPLC using method 2 afforded the title compound (6.5 mg, 40%) as a white solid:  $R_T$  15.2 min;  $^1\text{H}$  NMR (600 MHz,  $\text{CD}_3\text{OD}$ )  $\delta$  1.32 (t,  $J = 7.2$  Hz, 3H), 3.53 (q,  $J = 7.2$  Hz, 2H), 5.88 (s, 2H), 7.32 (d,  $J = 6.0$  Hz, 2H), 7.49 (t,  $J = 7.2$

Hz, 1H), 7.53 (t,  $J = 7.2$  Hz, 2H), 8.10 (s, 1H), 8.22 (d,  $J = 7.2$  Hz, 2H), 8.43 (s, 1H), 8.47 (d,  $J = 6.0$  Hz, 2H);  $^{13}\text{C}$  NMR (150 MHz,  $\text{CD}_3\text{OD}$ )  $\delta$  14.7, 36.0, 50.4, 113.1, 113.8, 124.1, 128.7, 130.0, 131.1, 134.6, 138.9, 139.8, 149.0, 150.4, 153.0, 159.0, 167.5; HRMS (ESI $^-$ ) calcd for  $\text{C}_{21}\text{H}_{20}\text{N}_5\text{O}$   $[\text{M} + \text{H}]^+$  358.1668, found 358.1675 (error 2.0 ppm).

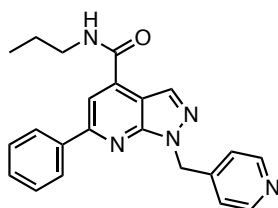

**6-Phenyl-*N*-propyl-1-(pyridin-4-ylmethyl)-1*H*-pyrazolo[3,4-*b*]pyridine-4-carboxamide**

**(25).** The title compound was prepared using the general procedure for the synthesis of 4-carboxamide analogues, using propylamine (149 mg, 207  $\mu\text{L}$ , 0.25 mmol, 5.6 equiv). Purification by preparative reverse-phase HPLC using method 2 afforded the title compound (6.5 mg, 40%) as a white solid:  $R_T$  16.8 min;  $^1\text{H}$  NMR (600 MHz,  $\text{CDCl}_3$ )  $\delta$  1.05 (t,  $J = 7.2$  Hz, 3H), 1.73 (sext,  $J = 7.2$  Hz, 2H), 3.54 (q,  $J = 7.2$  Hz, 2H), 5.80 (s, 2H), 6.41 (br s, 1H), 7.21 (d,  $J = 5.4$  Hz, 2H), 7.48 (t,  $J = 7.2$  Hz, 1H), 7.52 (t,  $J = 7.2$  Hz, 2H), 7.89 (s, 1H), 8.12 (d,  $J = 7.2$  Hz, 2H), 8.36 (s, 1H), 8.54 (d,  $J = 5.4$  Hz, 2H);  $^{13}\text{C}$  NMR (150 MHz,  $\text{CDCl}_3$ )  $\delta$  11.7, 23.1, 42.2, 49.9, 111.6, 112.9, 122.7, 127.7, 129.1, 130.2, 132.8, 137.5, 138.5, 145.8, 150.3, 151.8, 157.7, 165.6; HRMS (ESI $^-$ ) calcd for  $\text{C}_{22}\text{H}_{22}\text{N}_5\text{O}$   $[\text{M} + \text{H}]^+$  372.1824, found 372.1830 (error 1.6 ppm).

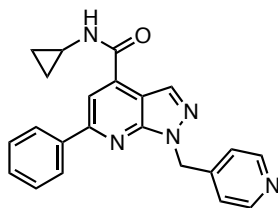

***N*-Cyclopropyl-6-phenyl-1-(pyridin-4-ylmethyl)-1*H*-pyrazolo[3,4-*b*]pyridine-4-carboxamide (27).** The title compound was prepared using the general procedure for the synthesis of 4-carboxamide analogues, using cyclopropylamine (144 mg, 175  $\mu\text{L}$ , 0.25 mmol,

5.6 equiv). Purification by preparative reverse-phase HPLC using method 2 afforded the title compound (4.7 mg, 28%) as a white solid:  $R_T$  15.3 min;  $^1H$  NMR (600 MHz,  $CDCl_3$ )  $\delta$  0.72–0.74 (m, 2H), 0.95–0.99 (m, 2H), 2.99–3.04 (m, 1H), 5.79 (s, 2H), 6.57 (br s, 1H), 7.20 (d,  $J = 6.0$  Hz, 2H), 7.48 (t,  $J = 7.2$  Hz, 1H), 7.51 (t,  $J = 7.2$  Hz, 2H), 7.84 (s, 1H), 8.10 (d,  $J = 7.2$  Hz, 2H), 8.37 (s, 1H), 8.53 (d,  $J = 6.0$  Hz, 2H);  $^{13}C$  NMR (150 MHz,  $CDCl_3$ )  $\delta$  7.1, 23.5, 49.9, 111.6, 112.7, 122.7, 127.7, 129.1, 130.2, 133.0, 136.9, 138.5, 145.8, 150.3, 151.8, 157.6, 166.9; HRMS (ESI $^-$ ) calcd for  $C_{22}H_{20}N_5O$   $[M + H]^+$  370.1668, found 370.1673 (error 1.4 ppm).

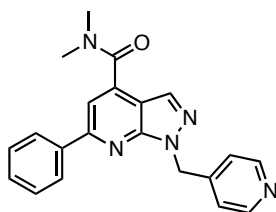

***N,N*-Dimethyl-6-phenyl-1-(pyridin-4-ylmethyl)-1*H*-pyrazolo[3,4-*b*]pyridine-4-carboxamide (28).** The title compound was prepared using the general procedure for the synthesis of 4-carboxamide analogues, using a 2 M dimethylamine solution in methanol (1.26 mL, 0.25 mmol, 5.6 equiv). Purification by preparative reverse-phase HPLC using method 2 afforded the title compound (6.5 mg, 40%) as a white solid:  $R_T$  14.4 min;  $^1H$  NMR (600 MHz,  $CDCl_3$ )  $\delta$  3.02 (s, 3H), 3.24 (s, 3H), 5.79 (s, 2H), 7.23 (d,  $J = 6.0$  Hz, 2H), 7.48 (t,  $J = 7.2$  Hz, 1H), 7.51 (t,  $J = 7.2$  Hz, 2H), 7.65 (s, 1H), 8.06 (s, 1H), 8.10 (d,  $J = 7.2$  Hz, 2H), 8.55 (d,  $J = 6.0$  Hz, 2H);  $^{13}C$  NMR (150 MHz,  $CDCl_3$ )  $\delta$  35.7, 39.2, 49.8, 111.4, 113.0, 122.8, 127.7, 129.1, 130.1, 132.3, 138.6, 138.8, 145.8, 150.3, 151.3, 157.6, 167.9; HRMS (ESI $^-$ ) calcd for  $C_{21}H_{20}N_5O$   $[M + H]^+$  358.1668, found 358.1662 (error 1.7 ppm).

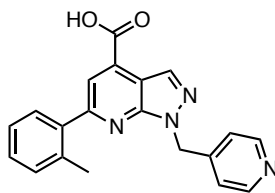

**1-(Pyridin-4-ylmethyl)-6-*o*-tolyl-1*H*-pyrazolo[3,4-*b*]pyridine-4-carboxylic acid (37).**

Ethyl 1-(pyridin-4-ylmethyl)-6-*o*-tolyl-1*H*-pyrazolo[3,4-*b*]pyridine-4-carboxylate was prepared using the general procedure for Suzuki coupling of **109** with *o*-tolylboronic acid (91.1 mg, 0.67 mmol, 2 equiv). Purification by flash chromatography afforded the ethyl ester of the title compound (77 mg, 58%) as a white solid:  $R_f$  0.41 (EtOAc);  $^1\text{H}$  NMR (600 MHz,  $\text{CDCl}_3$ )  $\delta$  1.48 (t,  $J = 7.2$  Hz, 3H), 2.35 (s, 3H), 4.52 (q,  $J = 7.2$  Hz, 2H), 5.76 (s, 2H), 7.15 (d,  $J = 6.0$  Hz, 2H), 7.29–7.36 (m, 3H), 7.48 (d,  $J = 7.2$  Hz, 1H), 7.94 (s, 1H), 8.51 (s, 1H), 8.52 (d,  $J = 6.0$  Hz, 2H);  $^{13}\text{C}$  NMR (150 MHz,  $\text{CDCl}_3$ )  $\delta$  14.4, 20.6, 49.9, 62.1, 111.7, 119.4, 122.5, 126.2, 129.2, 130.1, 131.3, 131.9, 133.9, 136.4, 139.3, 145.9, 150.2, 151.4, 160.2, 165.1.

Ethyl 1-(pyridin-4-ylmethyl)-6-*o*-tolyl-1*H*-pyrazolo[3,4-*b*]pyridine-4-carboxylate (50 mg, 0.134 mmol, 1.0 equiv) prepared above was converted to the title compound using the general procedure for ester hydrolysis. Purification by preparative reverse-phase HPLC using method 2 afforded the title compound (45 mg, 97%) as a white solid:  $R_T$  10.8 min;  $^1\text{H}$  NMR (600 MHz,  $\text{CD}_3\text{OD}$ )  $\delta$  2.29 (s, 3H), 5.81 (s, 2H), 7.35 (d,  $J = 6.0$  Hz, 2H), 7.27–7.34 (m, 3H), 7.46 (d,  $J = 7.2$  Hz, 1H), 7.76 (s, 1H), 8.44 (d,  $J = 6.0$  Hz, 2H), 8.58 (s, 1H);  $^{13}\text{C}$  NMR (150 MHz,  $\text{CD}_3\text{OD}$ )  $\delta$  20.6, 50.5, 114.4, 119.6, 123.9, 127.0, 129.7, 130.9, 131.9, 135.9, 137.4, 141.4, 142.8, 149.3, 150.3, 152.5, 161.8, 172.2; HRMS (ESI $^-$ ) calcd for  $\text{C}_{20}\text{H}_{15}\text{N}_4\text{O}_2$   $[\text{M} - \text{H}]^-$  343.1195, found 343.1203 (error 2.3 ppm).

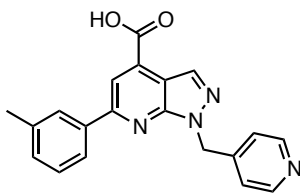

**1-(Pyridin-4-ylmethyl)-6-*m*-tolyl-1*H*-pyrazolo[3,4-*b*]pyridine-4-carboxylic acid (38).**

Ethyl 1-(pyridin-4-ylmethyl)-6-*m*-tolyl-1*H*-pyrazolo[3,4-*b*]pyridine-4-carboxylate was prepared using the general procedure for Suzuki coupling of **109** with 3-tolylboronic acid (91 mg, 0.67 mmol, 2.0 equiv). Purification by flash chromatography afforded the ethyl ester of the title compound (96.0 mg, 71%) as a pale brown solid:  $R_f$  0.38 (EtOAc);  $^1\text{H}$  NMR (600 MHz,  $\text{CDCl}_3$ )  $\delta$  1.50 (t,  $J = 7.2$  Hz, 3H), 2.45 (s, 3H), 4.53 (q,  $J = 7.2$  Hz, 2H), 5.79 (s, 2H), 7.20 (d,  $J = 6.0$  Hz, 2H), 7.27 (d,  $J = 7.2$  Hz, 1H), 7.39 (t,  $J = 7.2$  Hz, 1H), 7.93 (ovlp d,  $J = 7.2$  Hz, 1H), 7.94 (ovlp s, 1H), 8.24 (s, 1H), 8.43 (s, 1H), 8.53 (d,  $J = 6.0$  Hz, 2H);  $^{13}\text{C}$  NMR (150 MHz,  $\text{CDCl}_3$ )  $\delta$  14.4, 21.6, 49.7, 62.1, 112.0, 115.9, 122.6, 124.8, 128.2, 128.9, 130.8, 132.2, 133.9, 138.2, 138.7, 145.9, 150.1, 151.9, 157.6, 165.2.

Ethyl 1-(pyridin-4-ylmethyl)-6-*m*-tolyl-1*H*-pyrazolo[3,4-*b*]pyridine-4-carboxylate (50.0 mg, 0.134 mmol, 1.0 equiv) prepared above was converted to the title compound using the general procedure for ester hydrolysis. Purification by preparative reverse-phase HPLC using method 4 afforded the title compound (43.2 mg, 94%) as a white solid:  $R_T$  11.2 min;  $^1\text{H}$  NMR (400 MHz,  $\text{DMSO-}d_6$ )  $\delta$  2.42 (s, 3H), 5.85 (s, 2H), 7.21 (d,  $J = 6.0$  Hz, 2H), 7.32 (d,  $J = 7.6$  Hz, 1H), 7.43 (t,  $J = 7.6$  Hz, 1H), 8.01 (ovlp d,  $J = 7.6$  Hz, 1H), 8.02 (ovlp s, 1H), 8.23 (s, 1H), 8.45 (s, 1H), 8.51 (d,  $J = 6.0$  Hz, 2H);  $^{13}\text{C}$  NMR (100 MHz,  $\text{DMSO-}d_6$ )  $\delta$  21.1, 49.0, 111.9, 115.0, 122.3, 124.5, 127.8, 128.9, 130.1, 133.3, 133.8, 137.7, 138.3, 146.1, 149.9, 151.4, 156.4, 166.1; HRMS (ESI $^-$ ) calcd for  $\text{C}_{20}\text{H}_{15}\text{N}_4\text{O}_2$  [ $\text{M} - \text{H}$ ] $^-$  343.1200, found 343.1207 (error 2.0 ppm).

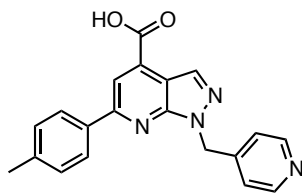

**1-(Pyridin-4-ylmethyl)-6-*p*-tolyl-1*H*-pyrazolo[3,4-*b*]pyridine-4-carboxylic acid (39).**

Ethyl 1-(pyridin-4-ylmethyl)-6-*p*-tolyl-1*H*-pyrazolo[3,4-*b*]pyridine-4-carboxylate was prepared using the general procedure for Suzuki coupling of **109** with *p*-tolylboronic acid (91.1 mg, 0.67 mmol, 2 equiv). Purification by flash chromatography afforded the ethyl ester of the title compound (70 mg, 56%) as a white solid:  $R_f$  0.39 (EtOAc);  $^1\text{H}$  NMR (600 MHz,  $\text{CDCl}_3$ )  $\delta$  1.50 (t,  $J = 7.2$  Hz, 3H), 2.42 (s, 3H), 4.53 (q,  $J = 7.2$  Hz, 2H), 5.79 (s, 2H), 7.20 (d,  $J = 6.0$  Hz, 2H), 7.31 (d,  $J = 7.8$  Hz, 2H), 8.05 (d,  $J = 7.8$  Hz, 2H), 8.24 (s, 1H), 8.43 (s, 1H), 8.54 (d,  $J = 6.0$  Hz, 2H);  $^{13}\text{C}$  NMR (150 MHz,  $\text{CDCl}_3$ )  $\delta$  14.5, 21.5, 49.8, 62.1, 111.9, 115.7, 122.7, 127.5, 129.8, 132.3, 133.9, 135.6, 140.4, 145.9, 150.2, 151.9, 157.4, 165.3.

Ethyl 1-(pyridin-4-ylmethyl)-6-*p*-tolyl-1*H*-pyrazolo[3,4-*b*]pyridine-4-carboxylate (50 mg, 0.134 mmol, 1.0 equiv) prepared above was converted to the title compound using the general procedure for ester hydrolysis. Purification by preparative reverse-phase HPLC using method 2 afforded the title compound (45.9 mg, 99%) as a white solid:  $R_T$  12.3 min;  $^1\text{H}$  NMR (600 MHz,  $\text{CD}_3\text{OD}$ )  $\delta$  2.41 (s, 3H), 5.85 (s, 2H), 7.35 (d,  $J = 6.0$  Hz, 2H), 7.29 (d,  $J = 6.0$  Hz, 2H), 7.31 (d,  $J = 7.8$  Hz, 2H), 8.07 (d,  $J = 7.8$  Hz, 2H), 8.17 (s, 1H), 8.45 (d,  $J = 6.0$  Hz, 2H), 8.51 (s, 1H);  $^{13}\text{C}$  NMR (150 MHz,  $\text{CD}_3\text{OD}$ )  $\delta$  21.3, 50.3, 114.5, 115.9, 124.1, 128.5, 130.5, 135.9, 137.6, 141.0, 143.0, 149.3, 150.3, 153.2, 159.0, 172.5; HRMS (ESI $^-$ ) calcd for  $\text{C}_{20}\text{H}_{15}\text{N}_4\text{O}_2$   $[\text{M} - \text{H}]^-$  343.1195, found 343.1202 (error 2.0 ppm).



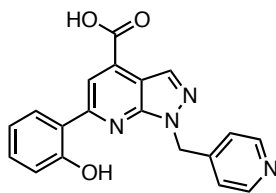

**6-(2-Hydroxyphenyl)-1-(pyridin-4-ylmethyl)-1H-pyrazolo[3,4-*b*]pyridine-4-carboxylic acid (40).** Ethyl 6-(2-hydroxyphenyl)-1-(pyridin-4-ylmethyl)-1H-pyrazolo[3,4-*b*]pyridine-4-carboxylate was prepared using the general procedure for Suzuki coupling of **109** with 2-hydroxybenzeneboronic acid (92 mg, 0.67 mmol, 2.0 equiv). After initial extraction with CH<sub>2</sub>Cl<sub>2</sub> the aqueous phase was back extracted with EtOAc (15 mL) and the organic extracts were combined and concentrated. Purification by flash chromatography afforded the ethyl ester of the title compound (108.5 mg, 87%) as a yellow solid: *R<sub>f</sub>* 0.47 (EtOAc); <sup>1</sup>H NMR (600 MHz, CDCl<sub>3</sub>) δ 1.51 (t, *J* = 7.2 Hz, 3H), 5.55 (q, *J* = 7.2 Hz, 2H), 5.68 (s, 2H), 6.95–6.98 (m, 1H), 7.02 (dd, *J* = 8.4 Hz, 1.2 Hz, 1H), 7.18 (d, *J* = 6.0 Hz, 2H), 7.34–7.37 (m, 1H), 7.94 (dd, *J* = 8.4, 1.8 Hz, 1H), 8.35 (s, 1H), 8.44 (s, 1H), 8.55 (d, *J* = 6.0 Hz, 2H), 12.90 (s, 1H); <sup>13</sup>C NMR (150 MHz, CDCl<sub>3</sub>) δ 14.4, 50.6, 62.5, 112.4, 114.9, 118.7, 118.9, 119.8, 122.4, 127.9, 132.8, 133.4, 134.4, 144.7, 148.7, 150.5, 157.9, 159.6, 164.6.

Ethyl 6-(2-hydroxyphenyl)-1-(pyridin-4-ylmethyl)-1H-pyrazolo[3,4-*b*]pyridine-4-carboxylate (50.0 mg, 0.134 mmol, 1.0 equiv) prepared above was converted to the title compound using the general procedure for ester hydrolysis. Purification by preparative reverse-phase HPLC using method 4 afforded the title compound (43.7 mg, 94%) as a yellow solid: *R<sub>T</sub>* 9.7 min; <sup>1</sup>H NMR (400 MHz, DMSO-*d*<sub>6</sub>) δ 5.82 (s, 2H), 6.95–7.01 (m, 2H), 7.18 (d, *J* = 6.0 Hz, 2H), 7.32–7.36 (m, 1H), 8.00 (d, *J* = 8.0 Hz, 1H), 8.40 (s, 1H), 8.48 (s, 1H), 8.51 (d, *J* = 6.0 Hz, 2H), 11.66 (br s, 1H); <sup>13</sup>C NMR (100 MHz, DMSO-*d*<sub>6</sub>) δ 49.4, 112.2, 116.5, 117.4, 119.6, 121.9,

122.1, 129.5, 131.6, 133.8, 135.9, 145.9, 149.6, 150.0, 156.4, 157.3, 166.1; HRMS (ESI<sup>-</sup>) calcd for C<sub>19</sub>H<sub>13</sub>N<sub>4</sub>O<sub>3</sub> [M - H]<sup>-</sup> 345.0993, found 345.0996 (error 0.9 ppm).

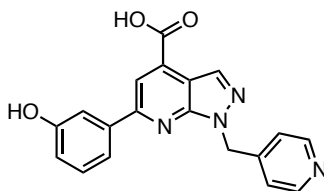

**6-(3-Hydroxyphenyl)-1-(pyridin-4-ylmethyl)-1H-pyrazolo[3,4-*b*]pyridine-4-carboxylic acid (41).** Ethyl 6-(3-hydroxyphenyl)-1-(pyridin-4-ylmethyl)-1H-pyrazolo[3,4-*b*]pyridine-4-carboxylate was prepared using the general procedure for Suzuki coupling of **109** with 3-hydroxyphenylboronic acid (92 mg, 0.67 mmol, 2.0 equiv). The aqueous phase was back extracted with CH<sub>2</sub>Cl<sub>2</sub> (4 × 10 mL) and the organic extracts were combined and concentrated. Purification by flash chromatography afforded the ethyl ester of the title compound (26.5 mg, 21%) as a pale brown solid: *R<sub>f</sub>* 0.38 (EtOAc); <sup>1</sup>H NMR (600 MHz, CDCl<sub>3</sub>) δ 1.50 (t, *J* = 7.2 Hz, 3H), 4.54 (q, *J* = 7.2 Hz, 2H), 5.74 (s, 2H), 6.99 (dd, *J* = 7.8, 1.8 Hz, 1H), 7.21 (d, *J* = 6.0 Hz, 2H), 7.37 (t, *J* = 7.8 Hz, 1H), 7.63 (d, *J* = 7.8 Hz, 1H), 7.82 (t, *J* = 1.8 Hz, 1H), 8.27 (s, 1H), 8.44 (s, 1H), 8.57 (d, *J* = 6.0 Hz, 2H); <sup>13</sup>C NMR (150 MHz, CDCl<sub>3</sub>) δ 14.5, 49.6, 62.3, 112.2, 114.3, 116.0, 117.8, 119.4, 123.1, 130.3, 132.4, 134.2, 139.5, 146.8, 149.6, 151.9, 157.2, 157.6, 165.2.

Ethyl 6-(3-hydroxyphenyl)-1-(pyridin-4-ylmethyl)-1H-pyrazolo[3,4-*b*]pyridine-4-carboxylate (20.0 mg, 0.0534 mmol, 1.0 equiv) prepared above was converted to the title compound using the general procedure for ester hydrolysis. Purification by preparative reverse-phase HPLC using method 4 afforded the title compound (16.2 mg, 88%) as a white solid: *R<sub>T</sub>* 8.7 min; <sup>1</sup>H NMR (400 MHz, DMSO-*d*<sub>6</sub>) δ 5.84 (s, 2H), 6.91 (dd, *J* = 8.0, 1.6 Hz, 1H), 7.20 (d, *J* = 6.0 Hz, 2H), 7.35 (t, *J* = 8.0 Hz, 1H), 7.62–7.63 (m, 2H), 8.16 (s, 1H), 8.45 (s, 1H), 8.51 (d, *J* = 6.0 Hz, 2H), 9.68 (br s, 1H); <sup>13</sup>C NMR (100 MHz, DMSO-*d*<sub>6</sub>) δ 49.0, 111.9, 113.9, 115.0, 117.2,

118.1, 122.3, 130.1, 133.3, 133.7, 139.0, 146.0, 149.9, 151.4, 156.3, 157.9, 166.0; HRMS (ESI-) calcd for C<sub>19</sub>H<sub>13</sub>N<sub>4</sub>O<sub>3</sub> [M – H]<sup>-</sup> 345.0993, found 345.0996 (error 0.9 ppm).

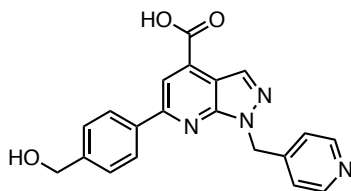

**6-[4-(Hydroxymethyl)phenyl]-1-(pyridin-4-ylmethyl)-1H-pyrazolo[3,4-*b*]pyridine-4-carboxylic acid (43).** Ethyl 6-[4-(hydroxymethyl)phenyl]-1-(pyridin-4-ylmethyl)-1H-pyrazolo[3,4-*b*]pyridine-4-carboxylate was prepared using the general procedure for Suzuki coupling of **109** with 4-(hydroxymethyl)phenylboronic acid (102 mg, 0.67 mmol, 2.0 equiv). After initial extraction with CH<sub>2</sub>Cl<sub>2</sub> the aqueous phase was back extracted with EtOAc (15 mL) and the organic extracts were combined and concentrated. Purification by flash chromatography afforded the ethyl ester of the title compound (40.7 mg, 31%) as a brown solid: *R<sub>f</sub>* 0.19 (EtOAc); <sup>1</sup>H NMR (600 MHz, DMSO-*d*<sub>6</sub>) δ 1.44 (t, *J* = 7.2 Hz, 3H), 4.50 (q, *J* = 7.2 Hz, 2H), 4.59 (d, *J* = 5.4 Hz, 2H), 5.33 (t, *J* = 5.4 Hz, 1H), 5.87 (s, 2H), 7.20 (d, *J* = 6.0 Hz, 2H), 7.50 (d, *J* = 8.4 Hz, 2H), 8.21 (d, *J* = 8.4 Hz, 2H), 8.26 (s, 1H), 8.46 (s, 1H), 8.50 (d, *J* = 6.0 Hz, 2H); <sup>13</sup>C NMR (150 MHz, DMSO-*d*<sub>6</sub>) δ 14.1, 49.1, 62.0, 62.5, 111.3, 114.8, 122.3, 127.0, 127.2, 132.2, 133.3, 135.9, 145.0, 146.1, 149.9, 151.4, 156.3, 164.5.

Ethyl 6-[4-(hydroxymethyl)phenyl]-1-(pyridin-4-ylmethyl)-1H-pyrazolo[3,4-*b*]pyridine-4-carboxylate (24.0 mg, 0.0618 mmol, 1.0 equiv) prepared above was converted to the title compound using the general procedure for ester hydrolysis. Purification by preparative reverse-phase HPLC using method 4 afforded the title compound (5.8 mg, 26%) as a pale yellow solid: *R<sub>T</sub>* 8.4 min; <sup>1</sup>H NMR (400 MHz, DMSO-*d*<sub>6</sub>) δ 4.58 (s, 2H), 5.84 (s, 2H), 7.21 (d, *J* = 6.0 Hz, 2H), 7.48 (d, *J* = 8.4 Hz, 2H), 8.18–8.21 (m, 3H), 8.45–8.51 (m, 3H); <sup>13</sup>C NMR (150 MHz, DMF-*d*<sub>7</sub>)

$\delta$  50.4, 64.3, 113.4, 116.1, 123.6, 128.1, 128.4, 134.6, 135.0, 137.8, 146.2, 147.5, 151.2, 153.0, 157.9, 167.4; HRMS (ESI<sup>-</sup>) calcd for C<sub>20</sub>H<sub>15</sub>N<sub>4</sub>O<sub>3</sub> [M - H]<sup>-</sup> 359.1150, found 359.1148 (error 0.6 ppm).

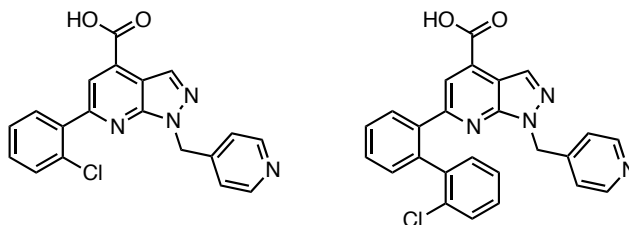

**6-(2-Chlorophenyl)-1-(pyridin-4-ylmethyl)-1H-pyrazolo[3,4-*b*]pyridine-4-carboxylic acid (44) and 6-(2'-Chlorobiphenyl-2-yl)-1-(pyridin-4-ylmethyl)-1H-pyrazolo[3,4-*b*]pyridine-4-carboxylic acid (74).** 2-Chlorophenylboronic acid (105 mg, 0.67 mmol, 2.0 equiv) was coupled to **109** (100 mg, 0.335 mmol, 1.0 equiv) using the general procedure for Suzuki coupling. Purification by flash chromatography afforded a mixture of the ethyl esters of the two title compounds (confirmed by APCI<sup>+</sup> MS) as a brown oil (99 mg), which was not purified further. The mixture was converted to the title compounds using the general procedure for ester hydrolysis. Purification by preparative reverse-phase HPLC using method 2 afforded the title compounds **44** (18 mg, 15%) as a white solid and **74** (7 mg, 5%) as a light orange solid.

Data for **44**: R<sub>T</sub> 9.8 min; <sup>1</sup>H NMR (400 MHz, DMSO-*d*<sub>6</sub>)  $\delta$  5.80 (s, 2H), 7.18 (d, *J* = 6.0 Hz, 2H), 7.49–7.55 (m, 2H), 7.62–7.69 (m, 2H), 7.91 (s, 1H), 8.50 (d, *J* = 6.0 Hz, 2H), 8.53 (s, 1H); <sup>13</sup>C NMR (150 MHz, DMF-*d*<sub>7</sub>)  $\delta$  50.4, 110.9, 114.0, 120.1, 123.5, 128.6, 130.8, 131.3, 131.6, 132.9, 133.2, 135.2, 140.0, 147.6, 151.1, 152.6, 157.5; HRMS (ESI<sup>-</sup>) calcd for C<sub>19</sub>H<sub>12</sub>ClN<sub>4</sub>O<sub>2</sub> [M - H]<sup>-</sup> 363.0654, found 363.0655 (error 0.3 ppm).

Data for **74**: R<sub>T</sub> 12.1 min; <sup>1</sup>H NMR (400 MHz, DMSO-*d*<sub>6</sub>)  $\delta$  5.38 (s, 2H), 6.93 (d, *J* = 6.0 Hz, 2H), 7.08–7.13 (m, 1H), 7.21–7.25 (m, 3H), 7.35–7.37 (m, 1H), 7.55–7.61 (m, 2H), 7.66 (s, 1H),

7.80–7.82 (m, 1H), 8.38 (s, 1H), 8.47 (d,  $J = 6.0$  Hz, 2H);  $^{13}\text{C}$  NMR (150 MHz, DMF- $d_7$ )  $\delta$  49.8, 119.5, 119.6, 123.4, 123.5, 127.8, 129.5, 129.9, 130.0, 130.1, 131.2, 132.3, 133.0, 133.5, 134.8, 139.8, 140.3, 141.8, 147.4, 151.0, 151.1, 152.2, 159.5.; HRMS (ESI $^-$ ) calcd for  $\text{C}_{25}\text{H}_{16}\text{ClN}_4\text{O}_2$   $[\text{M} - \text{H}]^-$  439.0967, found 439.0971 (error 0.9 ppm).

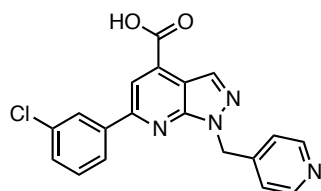

**6-(3-Chlorophenyl)-1-(pyridin-4-ylmethyl)-1H-pyrazolo[3,4-*b*]pyridine-4-carboxylic acid (45).** Ethyl 6-(3-chlorophenyl)-1-(pyridin-4-ylmethyl)-1H-pyrazolo[3,4-*b*]pyridine-4-carboxylate was prepared using the general procedure for Suzuki coupling of **109** with 3-chlorophenylboronic acid (105 mg, 0.67 mmol, 2 equiv). Purification by flash chromatography afforded the ethyl ester of the title compound (83 mg, 63%) as a white solid:  $R_f$  0.45 (EtOAc);  $^1\text{H}$  NMR (600 MHz,  $\text{CDCl}_3$ )  $\delta$  1.51 (t,  $J = 7.2$  Hz, 3H), 4.55 (q,  $J = 7.2$  Hz, 2H), 5.80 (s, 2H), 7.19 (d,  $J = 5.4$  Hz, 2H), 7.43 (d,  $J = 5.4$  Hz, 2H), 7.99–8.01 (m, 1H), 8.15 (s, 1H), 8.22 (s, 1H), 8.46 (s, 1H), 8.54 (d,  $J = 5.4$  Hz, 2H);  $^{13}\text{C}$  NMR (150 MHz,  $\text{CDCl}_3$ )  $\delta$  14.5, 49.9, 62.3, 112.5, 115.7, 122.6, 125.7, 127.7, 130.0, 130.3, 132.6, 134.0, 135.2, 140.1, 145.7, 150.3, 151.8, 155.8, 165.0.

Ethyl 6-(3-chlorophenyl)-1-(pyridin-4-ylmethyl)-1H-pyrazolo[3,4-*b*]pyridine-4-carboxylate (50 mg, 0.127 mmol, 1.0 equiv) prepared above was converted to the title compound using the general procedure for ester hydrolysis. Purification by preparative reverse-phase HPLC using method 2 afforded the title compound (45.9 mg, 99%) as a white solid:  $R_T$  13.1 min;  $^1\text{H}$  NMR (600 MHz,  $\text{CD}_3\text{OD}$ )  $\delta$  5.87 (s, 2H), 7.30 (d,  $J = 5.4$  Hz, 2H), 7.45 (d,  $J = 7.8$  Hz, 1H), 7.49 (t,  $J = 7.8$  Hz, 1H), 8.10 (d,  $J = 7.8$  Hz, 1H), 8.19 (s, 1H), 8.29 (s, 1H), 8.46 (d,  $J = 5.4$  Hz, 2H), 8.55 (s,

1H); <sup>13</sup>C NMR (150 MHz, CD<sub>3</sub>OD) δ 50.4, 115.1, 115.9, 124.1, 126.8, 128.4, 130.5, 131.4, 135.9, 136.0, 142.4, 143.4, 149.3, 150.3, 153.1, 157.0, 172.1; HRMS (ESI<sup>-</sup>) calcd for C<sub>19</sub>H<sub>12</sub>ClN<sub>4</sub>O<sub>2</sub> [M – H]<sup>-</sup> 363.0649, found 363.0654 (error 1.7 ppm).

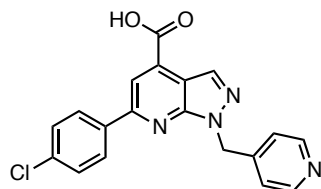

**6-(4-Chlorophenyl)-1-(pyridin-4-ylmethyl)-1H-pyrazolo[3,4-*b*]pyridine-4-carboxylic acid (46).**

Ethyl 6-(4-chlorophenyl)-1-(pyridin-4-ylmethyl)-1H-pyrazolo[3,4-*b*]pyridine-4-carboxylate was prepared using the general procedure for Suzuki coupling of **109** with 4-chlorophenylboronic acid (105 mg, 0.67 mmol, 2 equiv). Purification by flash chromatography afforded the ethyl ester of the title compound (90 mg, 70%) as a white solid: *R<sub>f</sub>* 0.43 (EtOAc); <sup>1</sup>H NMR (600 MHz, CDCl<sub>3</sub>) δ 1.51 (t, *J* = 7.2 Hz, 3H), 4.55 (q, *J* = 7.2 Hz, 2H), 5.80 (s, 2H), 7.20 (d, *J* = 4.8 Hz, 2H), 7.49 (d, *J* = 8.4 Hz, 2H), 8.10 (d, *J* = 8.4 Hz, 2H), 8.23 (s, 1H), 8.46 (s, 1H), 8.55 (d, *J* = 4.8 Hz, 2H); <sup>13</sup>C NMR (150 MHz, CDCl<sub>3</sub>) δ 14.5, 49.9, 62.3, 112.3, 115.5, 122.6, 128.9, 129.3, 132.6, 134.1, 136.4, 136.8, 145.8, 150.3, 151.9, 156.2, 165.1.

Ethyl 6-(4-chlorophenyl)-1-(pyridin-4-ylmethyl)-1H-pyrazolo[3,4-*b*]pyridine-4-carboxylate (15 mg, 0.038 mmol, 1.0 equiv) prepared above was converted to the title compound using the general procedure for ester hydrolysis. Purification by preparative reverse-phase HPLC using method 2 afforded the title compound (10 mg, 72%) as a white solid: *R<sub>T</sub>* 13.4 min; <sup>1</sup>H NMR (600 MHz, CD<sub>3</sub>OD) δ 5.86 (s, 2H), 7.29 (d, *J* = 6.0 Hz, 2H), 7.51 (d, *J* = 8.4 Hz, 2H), 8.18 (s, 1H), 8.19 (d, *J* = 8.4 Hz, 2H), 8.46 (d, *J* = 6.0 Hz, 2H), 8.53 (s, 1H); <sup>13</sup>C NMR (150 MHz, CD<sub>3</sub>OD) δ 50.3, 114.9, 115.8, 124.1, 129.98, 130.05, 135.9, 136.8, 139.0, 143.3, 149.3, 150.3, 153.1, 157.4,

172.2; HRMS (ESI<sup>-</sup>) calcd for C<sub>19</sub>H<sub>12</sub>ClN<sub>4</sub>O<sub>2</sub> [M - H]<sup>-</sup> 363.0649, found 363.0658 (error 2.5 ppm).

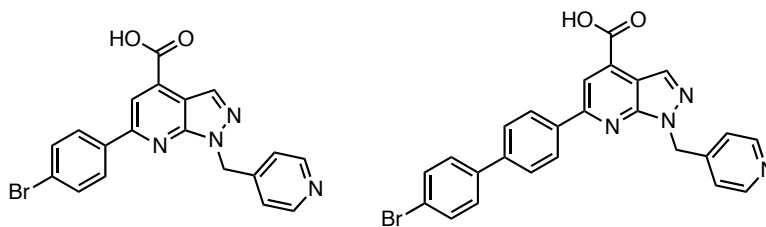

**6-(4-Bromophenyl)-1-(pyridin-4-ylmethyl)-1H-pyrazolo[3,4-*b*]pyridine-4-carboxylic acid (47) and 6-(4'-Bromobiphenyl-4-yl)-1-(pyridin-4-ylmethyl)-1H-pyrazolo[3,4-*b*]pyridine-4-carboxylic acid (73).** The ethyl esters of the title compounds were prepared using the general procedure for Suzuki coupling of **109** with 4-bromophenylboronic acid (135 mg, 0.67 mmol, 2 equiv). Purification by flash chromatography afforded a mixture of the esters of the two title compounds as a white solid, which was not purified further. The esters mixture (40 mg) was converted to the title compounds using the general procedure for ester hydrolysis. Purification by preparative reverse-phase HPLC using method 2 afforded the two title compounds as white solids **47** (13 mg, 9.5%) and **73** (12 mg, 7.4 %).

Data for **47**: R<sub>T</sub> 13.6 min; <sup>1</sup>H NMR (600 MHz, CD<sub>3</sub>OD) δ 5.85 (s, 2H), 7.29 (d, *J* = 6.0 Hz, 2H), 7.66 (d, *J* = 8.4 Hz, 2H), 8.11 (d, *J* = 8.4 Hz, 2H), 8.18 (s, 1H), 8.46 (d, *J* = 6.0 Hz, 2H), 8.53 (s, 1H); <sup>13</sup>C NMR (150 MHz, CD<sub>3</sub>OD) δ 50.3, 114.9, 115.7, 124.1, 125.0, 130.3, 133.0, 135.9, 139.4, 143.3, 149.3, 150.3, 153.1, 157.5, 172.2; HRMS (ESI<sup>-</sup>) calcd for C<sub>19</sub>H<sub>12</sub>BrN<sub>4</sub>O<sub>2</sub> [M - H]<sup>-</sup> 409.0144, found 409.0137 (error 1.7 ppm).

Data for **73**: R<sub>T</sub> 17.4 min; <sup>1</sup>H NMR (600 MHz, CD<sub>3</sub>OD) δ 5.87 (s, 2H), 7.31 (d, *J* = 5.4 Hz, 2H), 7.59–7.64 (m, 4H), 7.76 (d, *J* = 8.4 Hz, 2H), 8.25 (s, 1H), 8.28 (d, *J* = 8.4 Hz, 2H), 8.46 (d, *J* = 5.4 Hz, 2H), 8.54 (s, 1H); <sup>13</sup>C NMR (150 MHz, CD<sub>3</sub>OD) δ 50.3, 114.8, 116.0, 122.8, 124.1,

128.2, 129.2, 129.8, 133.0, 135.9, 139.6, 140.7, 142.2, 143.1, 149.3, 150.3, 153.2, 158.2, 172.3; HRMS (ESI<sup>-</sup>) calcd for C<sub>25</sub>H<sub>16</sub>BrN<sub>4</sub>O<sub>2</sub> [M - H]<sup>-</sup> 483.0457, found 483.0469 (error 2.5 ppm).

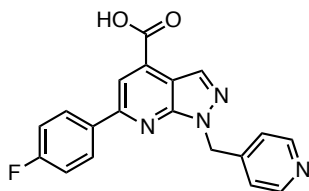

**6-(4-Fluorophenyl)-1-(pyridin-4-ylmethyl)-1H-pyrazolo[3,4-*b*]pyridine-4-carboxylic acid (48).** Ethyl 6-(4-fluorophenyl)-1-(pyridin-4-ylmethyl)-1H-pyrazolo[3,4-*b*]pyridine-4-carboxylate was prepared using the general procedure for Suzuki coupling of **109** with 4-fluorophenylboronic acid (94 mg, 0.67 mmol, 2.0 equiv). Purification by flash chromatography afforded the ethyl ester of the title compound (85.3 mg, 68%) as a gray solid: *R<sub>f</sub>* 0.42 (EtOAc); <sup>1</sup>H NMR (600 MHz, CDCl<sub>3</sub>) δ 1.50 (t, *J* = 7.2 Hz, 3H), 4.54 (q, *J* = 7.2 Hz, 2H), 5.79 (s, 2H), 7.16–7.20 (m, 4H), 8.12–8.15 (m, 2H), 8.20 (s, 1H), 8.44 (s, 1H), 8.54 (d, *J* = 6.0 Hz, 2H); <sup>13</sup>C NMR (150 MHz, CDCl<sub>3</sub>) δ 14.4, 49.8, 62.2, 112.0, 115.5, 116.0, 116.1, 122.6, 129.5, 129.6, 132.5, 134.0, 146.0, 150.0, 151.9, 156.3, 165.1.

Ethyl 6-(4-fluorophenyl)-1-(pyridin-4-ylmethyl)-1H-pyrazolo[3,4-*b*]pyridine-4-carboxylate (50.0 mg, 0.133 mmol, 1.0 equiv) prepared above was converted to the title compound using the general procedure for ester hydrolysis. Purification by preparative reverse-phase HPLC using method 4 afforded the title compound (40.8 mg, 88%) as a white solid: *R<sub>T</sub>* 10.7 min; <sup>1</sup>H NMR (400 MHz, DMSO-*d*<sub>6</sub>) δ 5.80 (s, 2H), 7.18 (d, *J* = 6.0 Hz, 2H), 7.32–7.37 (m, 2H), 8.07 (s, 1H), 8.22–8.25 (m, 2H), 8.48–8.50 (m, 3H); <sup>13</sup>C NMR (100 MHz, DMSO-*d*<sub>6</sub>) δ 48.8, 113.3, 114.1, 115.7, 115.9, 122.2, 129.35, 129.43, 134.5, 135.1, 146.5, 149.8, 151.4, 154.7, 166.7; HRMS (ESI<sup>-</sup>) calcd for C<sub>19</sub>H<sub>12</sub>FN<sub>4</sub>O<sub>2</sub> [M - H]<sup>-</sup> 347.0950, found 347.0964 (error 4.0 ppm).



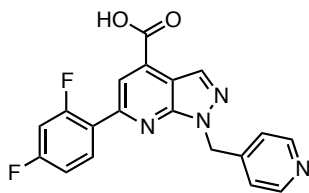

**6-(2,4-Difluorophenyl)-1-(pyridin-4-ylmethyl)-1H-pyrazolo[3,4-*b*]pyridine-4-carboxylic acid (49).** Ethyl 6-(2,4-difluorophenyl)-1-(pyridin-4-ylmethyl)-1H-pyrazolo[3,4-*b*]pyridine-4-carboxylate was prepared using the general procedure for Suzuki coupling of **109** with 2,4-difluorophenylboronic acid (106 mg, 0.67 mmol, 2 equiv). Purification by flash chromatography afforded the ethyl ester of the title compound (87 mg, 66%) as a white solid:  $R_f$  0.39 (EtOAc);  $^1\text{H}$  NMR (600 MHz,  $\text{CDCl}_3$ )  $\delta$  1.50 (t,  $J = 7.2$  Hz, 3H), 4.54 (q,  $J = 7.2$  Hz, 2H), 5.80 (s, 2H), 6.95-6.99 (m, 1H), 7.02-7.05 (m, 1H), 7.18 (d,  $J = 6.0$  Hz, 2H), 8.00-8.04 (m, 1H), 8.25 (d,  $J = 1.8$  Hz, 1H), 8.49 (s, 1H), 8.54 (d,  $J = 6.0$  Hz, 2H).

Ethyl 6-(2,4-difluorophenyl)-1-(pyridin-4-ylmethyl)-1H-pyrazolo[3,4-*b*]pyridine-4-carboxylate (50 mg, 0.127 mmol, 1.0 equiv) prepared above was converted to the title compound using the general procedure for ester hydrolysis. Purification by preparative reverse-phase HPLC using method 2 afforded the title compound (45 mg, 97%) as a white solid:  $R_T$  11.2 min;  $^1\text{H}$  NMR (600 MHz,  $\text{CD}_3\text{OD}$ )  $\delta$  5.84 (s, 2H), 7.09–7.12 (m, 2H), 7.28 (d,  $J = 6.0$  Hz, 2H), 8.02–8.06 (m, 1H), 8.08 (d,  $J = 2.4$  Hz, 1H), 8.45 (d,  $J = 6.0$  Hz, 2H), 8.56 (s, 1H); HRMS (ESI $^-$ ) calcd for  $\text{C}_{19}\text{H}_{11}\text{F}_2\text{N}_4\text{O}_2$   $[\text{M} - \text{H}]^-$  365.0850, found 365.0863 (error 3.6 ppm).

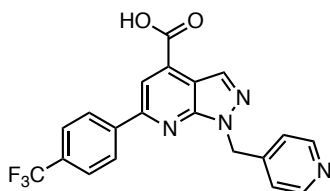

**1-(Pyridin-4-ylmethyl)-6-[4-(trifluoromethyl)phenyl]-1H-pyrazolo[3,4-*b*]pyridine-4-carboxylic acid (50).** Ethyl 1-(Pyridin-4-ylmethyl)-6-[4-(trifluoromethyl)phenyl]-1H-

pyrazolo[3,4-*b*]pyridine-4-carboxylate was prepared using the general procedure for Suzuki coupling of **109** with 4-(trifluoromethyl)phenylboronic acid (127.3 mg, 0.67 mmol, 2 equiv). Purification by flash chromatography afforded the ethyl ester of the title compound (92 mg, 62%) as a white solid:  $R_f$  0.46 (EtOAc);  $^1\text{H}$  NMR (600 MHz,  $\text{CDCl}_3$ )  $\delta$  1.53 (t,  $J = 7.2$  Hz, 3H), 4.57 (q,  $J = 7.2$  Hz, 2H), 5.84 (s, 2H), 7.25 (d,  $J = 6.0$  Hz, 2H), 7.79 (d,  $J = 8.4$  Hz, 2H), 8.27 (d,  $J = 8.4$  Hz, 2H), 8.30 (s, 1H), 8.50 (s, 1H), 8.56 (d,  $J = 6.0$  Hz, 2H).

Ethyl 1-(pyridin-4-ylmethyl)-6-(4-(trifluoromethyl)phenyl)-1*H*-pyrazolo[3,4-*b*]pyridine-4-carboxylate (90 mg, 0.211 mmol, 1.0 equiv) prepared above was converted to the title compound using the general procedure for ester hydrolysis. Purification by preparative reverse-phase HPLC using method 2 afforded the title compound (40 mg, 48%) as a white solid:  $R_T$  13.9 min;  $^1\text{H}$  NMR (600 MHz,  $\text{CD}_3\text{OD}$ )  $\delta$  5.88 (s, 2H), 7.31 (d,  $J = 6.0$  Hz, 2H), 7.81 (d,  $J = 8.4$  Hz, 2H), 8.25 (s, 1H), 8.39 (d,  $J = 8.4$  Hz, 2H), 8.47 (d,  $J = 6.0$  Hz, 2H), 8.56 (s, 1H);  $^{13}\text{C}$  NMR (150 MHz,  $\text{CD}_3\text{OD}$ )  $\delta$  50.3, 115.2, 116.1, 124.0, 125.7, 126.58, 126.61, 129.0, 135.9, 143.8, 149.0, 150.2, 153.0, 156.8, 172.0; HRMS (ESI $^-$ ) calcd for  $\text{C}_{20}\text{H}_{12}\text{F}_3\text{N}_4\text{O}_2$  [ $\text{M} - \text{H}$ ] $^-$  397.0912, found 397.0907 (error 0.3 ppm).

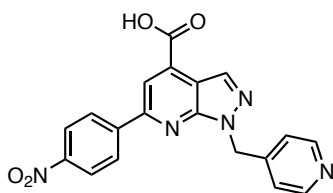

**6-(4-Nitrophenyl)-1-(pyridin-4-ylmethyl)-1*H*-pyrazolo[3,4-*b*]pyridine-4-carboxylic acid (**51**).** Ethyl 6-(4-nitrophenyl)-1-(pyridin-4-ylmethyl)-1*H*-pyrazolo[3,4-*b*]pyridine-4-carboxylate was prepared using the general procedure for Suzuki coupling of **109** with 4-nitrophenylboronic acid (112 mg, 0.67 mmol, 2.0 equiv). After initial extraction with  $\text{CH}_2\text{Cl}_2$  the aqueous phase was back extracted with EtOAc (15 mL) and the organic extracts were combined and concentrated.

Purification by flash chromatography afforded the ethyl ester of the title compound (67.0 mg, 50%) as a brown solid:  $R_f$  0.39 (EtOAc);  $^1\text{H}$  NMR (600 MHz,  $\text{CDCl}_3$ )  $\delta$  1.52 (t,  $J = 7.2$  Hz, 3H), 4.57 (q,  $J = 7.2$  Hz, 2H), 5.83 (s, 2H), 7.21 (d,  $J = 6.0$  Hz, 2H), 8.32–8.37 (m, 5H), 8.51 (s, 1H), 8.55 (d,  $J = 6.0$  Hz, 2H);  $^{13}\text{C}$  NMR (150 MHz,  $\text{CDCl}_3$ )  $\delta$  14.5, 50.0, 62.5, 113.1, 116.0, 122.6, 124.3, 128.5, 133.0, 134.2, 144.2, 145.6, 148.8, 150.2, 151.9, 154.6, 164.8.

Ethyl 6-(4-nitrophenyl)-1-(pyridin-4-ylmethyl)-1*H*-pyrazolo[3,4-*b*]pyridine-4-carboxylate (47 mg, 0.117 mmol, 1.0 equiv) prepared above was converted to the title compound using the general procedure for ester hydrolysis. Purification by preparative reverse-phase HPLC using method 2 afforded the title compound (38 mg, 88%) as a white solid:  $R_T$  11.2 min;  $^1\text{H}$  NMR (150 MHz,  $\text{DMSO-}d_6$ )  $\delta$  5.81 (s, 2H), 7.19 (d,  $J = 6.0$  Hz, 2H), 8.17 (s, 1H), 8.36 (d,  $J = 9.0$  Hz, 2H), 8.45 (d,  $J = 9.0$  Hz, 2H), 8.50 (d,  $J = 6.0$  Hz, 2H), 8.56 (s, 1H);  $^{13}\text{C}$  NMR (150 MHz,  $\text{DMSO-}d_6$ )  $\delta$  48.9, 114.6, 114.8, 122.3, 124.0, 128.3, 135.1, 145.0, 145.4, 146.4, 147.8, 149.9, 151.5, 153.0, 166.3; HRMS (ESI $^-$ ) calcd for  $\text{C}_{19}\text{H}_{12}\text{N}_5\text{O}_4$  [ $\text{M} - \text{H}$ ] $^-$  374.0889, found 374.0884 (error 1.3 ppm).

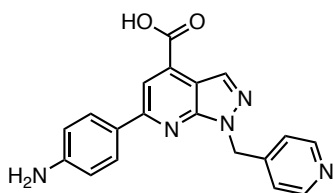

**6-(4-Aminophenyl)-1-(pyridin-4-ylmethyl)-1*H*-pyrazolo[3,4-*b*]pyridine-4-carboxylic acid (52).** Ethyl 6-(4-aminophenyl)-1-(pyridin-4-ylmethyl)-1*H*-pyrazolo[3,4-*b*]pyridine-4-carboxylate was prepared using the general procedure for Suzuki coupling of **109** (50 mg, 0.168 mmol, 1.0 equiv) with 4-(4,4,5,5-tetramethyl-1,3,2-dioxaborolan-2-yl)aniline (74 mg, 0.34 mmol, 2 equiv). Purification by flash chromatography afforded the ethyl ester of the title compound (27 mg, 43%) as a yellow solid:  $R_f$  0.25 (EtOAc);  $^1\text{H}$  NMR (600 MHz,  $\text{CDCl}_3$ )  $\delta$  1.50 (t,  $J = 7.2$  Hz, 3H), 4.53 (q,  $J = 7.2$  Hz, 2H), 5.77 (s, 2H), 6.77 (d,  $J = 8.4$  Hz, 2H), 7.19 (d,  $J = 6.0$  Hz, 2H),

8.01 (d,  $J = 8.4$  Hz, 2H), 8.18 (s, 1H), 8.34 (s, 1H), 8.53 (d,  $J = 6.0$  Hz, 2H);  $^{13}\text{C}$  NMR (150 MHz,  $\text{CDCl}_3$ )  $\delta$  14.5, 49.7, 62.1, 111.2, 115.11, 115.12, 122.7, 128.4, 129.0, 132.1, 134.0, 146.1, 146.7, 150.2, 152.0, 157.5, 165.5.

Ethyl 6-(4-aminophenyl)-1-(pyridin-4-ylmethyl)-1*H*-pyrazolo[3,4-*b*]pyridine-4-carboxylate (20 mg, 0.054 mmol, 1.0 equiv) prepared above was converted to the title compound using the general procedure for ester hydrolysis. Purification by preparative reverse-phase HPLC using method 6 afforded the title compound (8.1 mg, 44%) as a yellow solid:  $R_T$  6.5 min;  $^1\text{H}$  NMR (150 MHz,  $\text{CD}_3\text{OD}$ )  $\delta$  5.82 (s, 2H), 6.78 (d,  $J = 9.0$  Hz, 2H), 7.29 (d,  $J = 6.6$  Hz, 2H), 7.97 (d,  $J = 9.0$  Hz, 2H), 8.08 (s, 1H), 8.45–8.46 (m, 3H); HRMS (ESI $^-$ ) calcd for  $\text{C}_{19}\text{H}_{14}\text{N}_5\text{O}_2$  [ $\text{M} - \text{H}$ ] 344.1147, found 344.1150 (error 0.6 ppm).

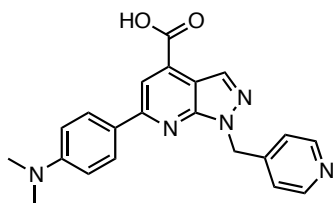

**6-[4-(Dimethylamino)phenyl]-1-(pyridin-4-ylmethyl)-1*H*-pyrazolo[3,4-*b*]pyridine-4-carboxylic acid (53).** Ethyl 6-[4-(dimethylamino)phenyl]-1-(pyridin-4-ylmethyl)-1*H*-pyrazolo[3,4-*b*]pyridine-4-carboxylate was prepared using the general procedure for Suzuki coupling of **109** with 4-(dimethylamino)phenylboronic acid (166 mg, 0.67 mmol, 2 equiv). Purification by flash chromatography afforded the ethyl ester of the title compound (130 mg, 97%) as a white solid:  $R_f$  0.35 (EtOAc);  $^1\text{H}$  NMR (600 MHz,  $\text{CDCl}_3$ )  $\delta$  1.51 (t,  $J = 7.2$  Hz, 3H), 3.06 (s, 6H), 4.53 (q,  $J = 7.2$  Hz, 2H), 5.78 (s, 2H), 6.80 (d,  $J = 9.0$  Hz, 2H), 7.21 (d,  $J = 6.0$  Hz, 2H), 8.10 (d,  $J = 9.0$  Hz, 2H), 8.21 (s, 1H), 8.37 (s, 1H), 8.53 (d,  $J = 6.0$  Hz, 2H);  $^{13}\text{C}$  NMR (150 MHz,  $\text{CDCl}_3$ )  $\delta$  14.5, 40.4, 49.7, 62.0, 111.1, 112.2, 115.1, 122.8, 125.9, 128.7, 131.9, 134.0, 146.2, 150.2, 151.8, 152.2, 157.7, 165.6.

Ethyl 6-[4-(dimethylamino)phenyl]-1-(pyridin-4-ylmethyl)-1*H*-pyrazolo[3,4-*b*]pyridine-4-carboxylate (50 mg, 0.125 mmol, 1.0 equiv) prepared above was converted to the title compound using the general procedure for ester hydrolysis. Purification by preparative reverse-phase HPLC using method 2 afforded the title compound as a white solid (41 mg, 88%):  $R_T$  11.8 min;  $^1H$  NMR (600 MHz,  $CD_3OD$ )  $\delta$  3.02 (s, 6H), 5.82 (s, 2H), 6.83 (d,  $J = 9.0$  Hz, 2H), 7.29 (d,  $J = 6.0$  Hz, 2H), 8.08 (d,  $J = 9.0$  Hz, 2H), 8.12 (s, 1H), 8.44–8.45 (m, 3H);  $^{13}C$  NMR (150 MHz,  $CD_3OD$ )  $\delta$  40.5, 50.2, 113.2, 113.6, 115.2, 124.1, 127.8, 129.5, 135.8, 142.5, 149.5, 150.3, 153.2, 153.3, 159.5, 172.8; HRMS (ESI $^-$ ) calcd for  $C_{21}H_{18}N_5O_2$   $[M - H]^-$  372.1460, found 372.1470 (error 2.7 ppm).

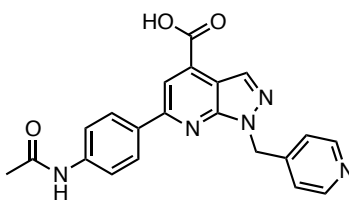

**6-(4-Acetamidophenyl)-1-(pyridin-4-ylmethyl)-1*H*-pyrazolo[3,4-*b*]pyridine-4-carboxylic acid (54).** Ethyl 6-(4-acetamidophenyl)-1-(pyridin-4-ylmethyl)-1*H*-pyrazolo[3,4-*b*]pyridine-4-carboxylate was prepared using the general procedure for Suzuki coupling of **109** with 4-acetamidophenylboronic acid (120 mg, 0.67 mmol, 2 equiv). Purification by flash chromatography afforded the ester (77 mg, 55%) as a white solid:  $R_f$  0.09 (EtOAc);  $^1H$  NMR (600 MHz,  $CDCl_3$ )  $\delta$  1.50 (t,  $J = 7.2$  Hz, 3H), 2.20 (s, 3H), 4.53 (q,  $J = 7.2$  Hz, 2H), 5.78 (s, 2H), 7.20 (d,  $J = 6.0$  Hz, 2H), 7.69 (d,  $J = 9.0$  Hz, 2H), 8.05 (br s, 1H), 8.11 (d,  $J = 9.0$  Hz, 2H), 8.21 (s, 1H), 8.42 (s, 1H), 8.52 (d,  $J = 6.0$  Hz, 2H);  $^{13}C$  NMR (150 MHz,  $CDCl_3$ )  $\delta$  14.5, 24.8, 49.8, 62.2, 111.9, 115.5, 120.0, 122.8, 128.4, 132.4, 133.8, 134.0, 140.1, 146.1, 150.1, 151.9, 156.7, 165.2, 169.0.

Ethyl 6-(4-acetamidophenyl)-1-(pyridin-4-ylmethyl)-1*H*-pyrazolo[3,4-*b*]pyridine-4-carboxylate (50 mg, 0.120 mmol, 1.0 equiv) prepared above was converted to the title compound using the general procedure for ester hydrolysis. Purification by preparative reverse-phase HPLC using method 2 afforded the title compound as a white solid (35 mg, 75%):  $R_T$  8.6 min;  $^1H$  NMR (600 MHz, DMSO- $d_6$ )  $\delta$  2.08 (s, 3H), 5.80 (s, 2H), 7.20 (d,  $J = 4.8$  Hz, 2H), 7.75 (d,  $J = 8.4$  Hz, 2H), 8.11 (s, 1H), 8.15 (d,  $J = 8.4$  Hz, 2H), 8.46 (s, 1H), 8.50 (d,  $J = 4.8$  Hz, 2H), 10.20 (s, 1H);  $^{13}C$  NMR (150 MHz, DMSO- $d_6$ )  $\delta$  24.2, 48.8, 112.6, 114.0, 119.0, 122.3, 127.7, 132.8, 134.2, 140.8, 146.5, 149.9, 151.5, 155.5, 156.5, 166.7, 168.6; HRMS (ESI $^-$ ) calcd for  $C_{21}H_{16}N_5O_3$  [ $M - H$ ] $^-$  386.1253, found 386.1262 (error 2.3 ppm).

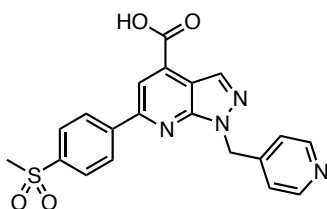

**6-[4-(Methylsulfonyl)phenyl]-1-(pyridin-4-ylmethyl)-1*H*-pyrazolo[3,4-*b*]pyridine-4-carboxylic acid (55).** Ethyl 6-[4-(methylsulfonyl)phenyl]-1-(pyridin-4-ylmethyl)-1*H*-pyrazolo[3,4-*b*]pyridine-4-carboxylate was prepared using the general procedure for Suzuki coupling of **109** with 4-(methylsulfonyl)phenylboronic acid (134 mg, 0.67 mmol, 2 equiv). Purification by flash chromatography afforded the ethyl ester of the title compound (85 mg, 58%) as a white solid:  $R_f$  0.22 (EtOAc);  $^1H$  NMR (600 MHz,  $CDCl_3$ )  $\delta$  1.52 (t,  $J = 7.2$  Hz, 3H), 3.11 (s, 3H), 4.57 (q,  $J = 7.2$  Hz, 2H), 5.83 (s, 2H), 7.19 (d,  $J = 6.0$  Hz, 2H), 8.09 (d,  $J = 8.4$  Hz, 2H), 8.30 (s, 1H), 8.35 (d,  $J = 8.4$  Hz, 2H), 8.50 (s, 1H), 8.55 (d,  $J = 6.0$  Hz, 2H);  $^{13}C$  NMR (150 MHz,  $CDCl_3$ )  $\delta$  14.6, 44.8, 50.1, 62.6, 113.1, 116.1, 122.7, 128.3, 128.7, 133.0, 134.2, 141.7, 143.5, 145.6, 150.4, 152.0, 155.1, 165.0.

Ethyl 6-[4-(methylsulfonyl)phenyl]-1-(pyridin-4-ylmethyl)-1*H*-pyrazolo[3,4-*b*]pyridine-4-carboxylate (50 mg, 0.115 mmol, 1.0 equiv) prepared above was converted to the title compound using the general procedure for ester hydrolysis. Purification by preparative reverse-phase HPLC using method 2 afforded the title compound (46 mg, 98%) as a white solid:  $R_T$  8.0 min;  $^1H$  NMR (600 MHz,  $CD_3OD$ )  $\delta$  3.18 (s, 3H), 5.88 (s, 2H), 7.30 (d,  $J = 5.4$  Hz, 2H), 8.08 (d,  $J = 8.4$  Hz, 2H), 8.27 (s, 1H), 8.44 (d,  $J = 8.4$  Hz, 2H), 8.46 (d,  $J = 5.4$  Hz, 2H), 8.57 (s, 1H);  $^{13}C$  NMR (150 MHz,  $CD_3OD$ )  $\delta$  44.4, 50.4, 115.4, 116.3, 124.1, 128.9, 129.4, 136.0, 142.6, 143.6, 145.4, 149.2, 150.4, 153.1, 156.4, 171.9; HRMS (ESI $^-$ ) calcd for  $C_{20}H_{15}N_4O_4S$   $[M - H]^-$  407.0814, found 407.0818 (error 1.0 ppm).

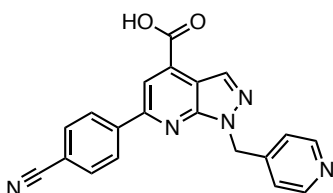

**6-(4-Cyanophenyl)-1-(pyridin-4-ylmethyl)-1*H*-pyrazolo[3,4-*b*]pyridine-4-carboxylic acid (56).** Ethyl 6-(4-cyanophenyl)-1-(pyridin-4-ylmethyl)-1*H*-pyrazolo[3,4-*b*]pyridine-4-carboxylate was prepared using the general procedure for Suzuki coupling of **109** with 4-cyanophenylboronic acid (98 mg, 0.67 mmol, 2 equiv). Purification by flash chromatography afforded the ethyl ester of the title compound (67 mg, 52%) as a white solid:  $R_f$  0.37 (EtOAc);  $^1H$  NMR (600 MHz,  $CDCl_3$ )  $\delta$  1.52 (t,  $J = 7.2$  Hz, 3H), 4.57 (q,  $J = 7.2$  Hz, 2H), 5.82 (s, 2H), 7.19 (d,  $J = 6.0$  Hz, 2H), 7.81 (d,  $J = 8.4$  Hz, 2H), 8.28 (d,  $J = 8.4$  Hz, 2H), 8.29 (s, 1H), 8.50 (s, 1H), 8.55 (d,  $J = 6.0$  Hz, 2H);  $^{13}C$  NMR (150 MHz,  $CDCl_3$ )  $\delta$  14.5, 50.0, 62.5, 113.0, 113.5, 115.8, 118.7, 122.6, 128.2, 132.8, 132.9, 134.2, 142.4, 145.5, 150.4, 151.9, 155.0, 164.9.

Ethyl 6-(4-cyanophenyl)-1-(pyridin-4-ylmethyl)-1*H*-pyrazolo[3,4-*b*]pyridine-4-carboxylate (50 mg, 0.130 mmol, 1.0 equiv) prepared above was converted to the title compound using the

general procedure for ester hydrolysis. Purification by preparative reverse-phase HPLC using method 2 afforded the title compound (34 mg, 73%) as a white solid:  $R_T$  10.2 min;  $^1\text{H}$  NMR (600 MHz,  $\text{DMSO-}d_6$ )  $\delta$  5.82 (s, 2H), 7.19 (d,  $J = 6.0$  Hz, 2H), 7.98 (d,  $J = 8.4$  Hz, 2H), 8.19 (s, 1H), 8.38 (d,  $J = 8.4$  Hz, 2H), 8.49 (d,  $J = 6.0$  Hz, 2H), 8.53 (s, 1H);  $^{13}\text{C}$  NMR (150 MHz,  $\text{DMSO-}d_6$ )  $\delta$  49.0, 111.9, 113.6, 115.0, 118.7, 122.3, 128.0, 132.9, 134.3, 142.5, 146.2, 149.9, 151.3, 153.8, 156.5, 166.1; HRMS (ESI $^-$ ) calcd for  $\text{C}_{20}\text{H}_{12}\text{N}_5\text{O}_2$   $[\text{M} - \text{H}]^-$  354.0991, found 354.0995 (error 1.1 ppm).

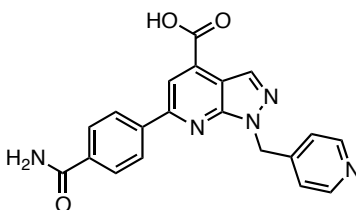

**6-(4-Carbamoylphenyl)-1-(pyridin-4-ylmethyl)-1H-pyrazolo[3,4-*b*]pyridine-4-carboxylic acid (57).** Ethyl 6-(4-carbamoylphenyl)-1-(pyridin-4-ylmethyl)-1H-pyrazolo[3,4-*b*]pyridine-4-carboxylate was prepared using the general procedure for Suzuki coupling of **109** with benzamide-4-boronic acid pinacol ester (166 mg, 0.67 mmol, 2.0 equiv). After initial extraction with  $\text{CH}_2\text{Cl}_2$  the aqueous phase was back extracted with EtOAc (15 mL) and the organic extracts were combined and concentrated. Purification by flash chromatography (0–10% MeOH/EtOAc) afforded the ethyl ester of the title compound (57.2 mg, 43%) as a brown solid:  $R_f$  0.06 (EtOAc);  $^1\text{H}$  NMR (600 MHz,  $\text{DMSO-}d_6$ )  $\delta$  1.45 (t,  $J = 7.2$  Hz, 3H), 4.51 (q,  $J = 7.2$  Hz, 2H), 5.90 (s, 2H), 7.22 (d,  $J = 6.0$  Hz, 2H), 7.48 (s, 1H), 8.04 (d,  $J = 8.4$  Hz, 2H), 8.11 (s, 1H), 8.32–8.33 (m, 3H), 8.50 (s, 1H), 8.51 (d,  $J = 6.0$  Hz, 2H);  $^{13}\text{C}$  NMR (150 MHz,  $\text{DMSO-}d_6$ )  $\delta$  14.1, 49.1, 62.1, 111.8, 115.2, 122.4, 127.3, 128.2, 132.4, 133.4, 135.5, 139.9, 146.0, 149.9, 151.3, 155.4, 164.4, 167.4.



Ethyl 6-(4-carbamoylphenyl)-1-(pyridin-4-ylmethyl)-1*H*-pyrazolo[3,4-*b*]pyridine-4-carboxylate (45.0 mg, 0.112 mmol, 1.0 equiv) prepared above was converted to the title compound using the general procedure for ester hydrolysis. Purification by preparative reverse-phase HPLC using method 4 afforded the title compound (24.4 mg, 58%) as a pale brown solid:  $R_T$  8.2 min;  $^1H$  NMR (400 MHz, DMSO- $d_6$ )  $\delta$  5.88 (s, 2H), 7.22 (d,  $J = 6.0$  Hz, 2H), 7.48 (s, 1H), 8.04 (d,  $J = 8.4$  Hz, 2H), 8.11 (s, 1H), 8.31–8.33 (m, 3H), 8.48–8.52 (m, 3H);  $^{13}C$  NMR (100 MHz, DMSO- $d_6$ )  $\delta$  49.1, 112.2, 115.3, 122.4, 127.2, 128.2, 133.4, 133.9, 135.4, 140.1, 146.0, 149.9, 151.4, 155.3, 166.0, 167.4; HRMS (ESI $^-$ ) calcd for  $C_{20}H_{14}N_5O_3$   $[M - H]^-$  372.1102, found 372.1079 (error 6.2 ppm).

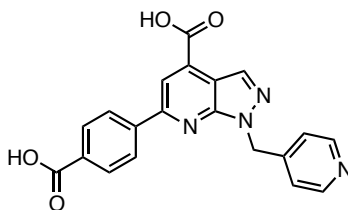

**6-(4-carboxyphenyl)-1-(pyridin-4-ylmethyl)-1*H*-pyrazolo[3,4-*b*]pyridine-4-carboxylic acid (58).** Ethyl 6-(4-carboxyphenyl)-1-(pyridin-4-ylmethyl)-1*H*-pyrazolo[3,4-*b*]pyridine-4-carboxylate was prepared using the general procedure for Suzuki coupling of **109** with 4-boronobenzoic acid (111 mg, 0.67 mmol, 2 equiv). The crude residue containing the ester, was directly converted to the title compound using the general procedure for ester hydrolysis. Purification by preparative reverse-phase HPLC using method 3 afforded the title compound as a white solid (8.4 mg, 7%):  $R_T$  6.9 min;  $^1H$  NMR (600 MHz, CD $_3$ OD)  $\delta$  5.89 (s, 2H), 7.32 (d,  $J = 6.0$  Hz, 2H), 8.07 (d,  $J = 8.4$  Hz, 2H), 8.19 (d,  $J = 8.4$  Hz, 2H), 8.24 (s, 1H), 8.47 (d,  $J = 6.0$  Hz, 2H), 8.53 (s, 1H);  $^{13}C$  NMR (150 MHz, CD $_3$ OD)  $\delta$  50.3, 114.8, 116.2, 124.1, 128.0, 130.7, 135.9, 140.2, 141.9, 143.1, 149.3, 150.3, 153.2, 158.5, 172.3, 174.9; HRMS (ESI $^-$ ) calcd for  $C_{20}H_{13}N_4O_4$   $[M - H]^-$  373.0937, found 373.0942 (error 1.3 ppm).

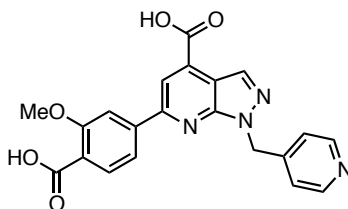

**6-(4-Carboxy-3-methoxyphenyl)-1-(pyridin-4-ylmethyl)-1H-pyrazolo[3,4-*b*]pyridine-4-carboxylic acid (59).** Ethyl 6-(3-methoxy-4-(methoxycarbonyl)phenyl)-1-(pyridin-4-ylmethyl)-1H-pyrazolo[3,4-*b*]pyridine-4-carboxylate was prepared using the general procedure for Suzuki coupling of **109** with 3-methoxy-4-(methoxycarbonyl)phenylboronic acid (141 mg, 0.67 mmol, 2.0 equiv). Purification by flash chromatography (EtOAc) afforded the ethyl ester of the title compound (112.0 mg, 75%) as a brown solid:  $R_f$  0.29 (EtOAc);  $^1\text{H}$  NMR (600 MHz,  $\text{CDCl}_3$ )  $\delta$  1.51 (t,  $J = 7.2$  Hz, 3H), 3.92 (s, 3H), 4.02 (s, 3H), 4.56 (q,  $J = 7.2$  Hz, 2H), 5.81 (s, 2H), 7.20 (d,  $J = 6.0$  Hz, 2H), 7.71 (d,  $J = 8.4$  Hz, 1H), 7.77 (s, 1H), 7.93 (d,  $J = 8.4$  Hz, 1H), 8.27 (s, 1H), 8.47 (s, 1H), 8.54 (d,  $J = 6.0$  Hz, 2H);  $^{13}\text{C}$  NMR (600 MHz,  $\text{CDCl}_3$ )  $\delta$  14.5, 50.1, 52.3, 56.3, 62.4, 111.1, 112.7, 116.1, 119.4, 121.3, 122.7, 132.4, 132.6, 134.1, 143.2, 145.7, 150.2, 151.8, 156.0, 159.7, 165.0, 166.4.

Ethyl 6-(3-methoxy-4-(methoxycarbonyl)phenyl)-1-(pyridin-4-ylmethyl)-1H-pyrazolo[3,4-*b*]pyridine-4-carboxylate (50.0 mg, 0.112 mmol, 1.0 equiv) prepared above was converted to the title compound using the general procedure for ester hydrolysis. Purification by preparative reverse-phase HPLC using method 4 afforded the title compound (45 mg, quant) as an off-white solid:  $R_T$  6.0 min:  $^1\text{H}$  NMR (600 MHz,  $\text{DMSO-}d_6$ )  $\delta$  3.94 (s, 3H), 5.82 (s, 2H), 7.22 (d,  $J = 6.0$  Hz, 2H), 7.74–7.79 (m, 2H), 7.83 (s, 1H), 8.14 (s, 1H), 8.49–8.50 (m, 3H);  $^{13}\text{C}$  NMR (150 MHz,  $\text{DMSO-}d_6$ )  $\delta$  49.1, 55.8, 110.7, 113.6, 114.6, 118.9, 122.4, 131.12, 131.13, 134.4, 142.6, 146.3, 149.8, 151.3, 154.6, 158.30, 158.32, 166.9, 167.2; HRMS (ESI $^-$ ) calcd for  $\text{C}_{21}\text{H}_{15}\text{N}_4\text{O}_5$   $[\text{M} - \text{H}]^-$  403.1048, found 403.1051 (error 0.7 ppm).

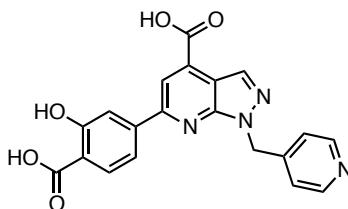

**6-(4-Carboxy-3-hydroxyphenyl)-1-(pyridin-4-ylmethyl)-1H-pyrazolo[3,4-*b*]pyridine-4-carboxylic acid (60).** Boron trifluoride-methyl sulfide complex (0.12 mL, 1.1 mmol) was added dropwise to a stirred solution of ethyl 6-(3-methoxy-4-(methoxycarbonyl)phenyl)-1-(pyridin-4-ylmethyl)-1H-pyrazolo[3,4-*b*]pyridine-4-carboxylate (see intermediate prepared for **59**) (50.0 mg, 0.112 mmol) in CH<sub>2</sub>Cl<sub>2</sub> (2.0 mL) at 0°C. The reaction was warmed to rt and stirred for 3.5 h. The reaction was quenched by slow addition of the mixture to 0.5 M aqueous HCl (5.0 mL) at 0 °C. The aqueous layer was neutralized with 1 M aqueous NaOH and extracted with EtOAc (3 × 20 mL). The organic layer was washed consecutively with saturated aqueous NaHCO<sub>3</sub> (20 mL), saturated aqueous NaCl (20 mL), H<sub>2</sub>O (20 mL), then dried (MgSO<sub>4</sub>), filtered, and concentrated. Purification by flash chromatography afforded ethyl 6-[3-hydroxy-4-(methoxycarbonyl)phenyl]-1-(pyridin-4-ylmethyl)-1H-pyrazolo[3,4-*b*]pyridine-4-carboxylate (18.1 mg, 37%) as a gray solid: *R<sub>f</sub>* = 0.43 (EtOAc); <sup>1</sup>H NMR (600 MHz, CDCl<sub>3</sub>) δ 1.51 (t, *J* = 7.2 Hz, 3H), 3.99 (s, 3H), 4.55 (q, *J* = 7.2 Hz, 2H), 5.81 (s, 2H), 7.20 (d, *J* = 6.0 Hz, 2H), 7.67 (dd, *J* = 8.4, 1.8 Hz, 1H), 7.81 (d, *J* = 1.8 Hz, 1H), 7.96 (d, *J* = 8.4 Hz, 1H), 8.28 (s, 1H), 8.48 (s, 1H), 8.54 (d, *J* = 6.0 Hz, 2H); <sup>13</sup>C NMR (150 MHz, CDCl<sub>3</sub>) δ 14.5, 49.9, 52.7, 62.3, 112.8, 113.5, 116.1, 116.6, 118.3, 122.7, 130.6, 132.6, 134.1, 145.1, 145.7, 150.3, 151.8, 155.6, 161.9, 165.0, 170.4.

Ethyl 6-(3-hydroxy-4-(methoxycarbonyl)phenyl)-1-(pyridin-4-ylmethyl)-1H-pyrazolo[3,4-*b*]pyridine-4-carboxylate (15.0 mg, 0.0347 mmol, 1.0 equiv) prepared above was converted to the title compound using the general procedure for ester hydrolysis. Purification by preparative reverse-phase HPLC using method 4 afforded the title compound (13.4 mg, 99%) as a pale

yellow solid:  $R_T$  5.9 min;  $^1\text{H}$  NMR (600 MHz,  $\text{DMSO-}d_6$ )  $\delta$  5.84 (s, 2H), 7.20 (d,  $J = 6.0$  Hz, 2H), 7.55 (s, 1H), 7.85 (d,  $J = 7.8$  Hz, 1H), 8.18 (s, 1H), 8.44 (s, 1H), 8.46–8.49 (m, 3H);  $^{13}\text{C}$  NMR (150 MHz,  $\text{DMSO-}d_6$ )  $\delta$  49.0, 112.1, 114.8, 115.3, 122.2, 122.5, 130.7, 133.4, 146.1, 149.8, 150.0, 151.3, 155.3, 155.8, 159.3, 162.6, 166.0, 171.2; HRMS (ESI $^-$ ) calcd for  $\text{C}_{20}\text{H}_{13}\text{N}_4\text{O}_5$  [ $\text{M} - \text{H}$ ] $^-$  389.0891, found 389.0893 (error 0.5 ppm).

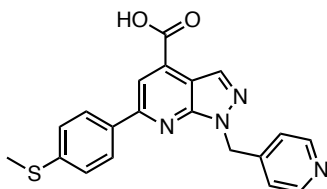

**6-[4-(Methylthio)phenyl]-1-(pyridin-4-ylmethyl)-1H-pyrazolo[3,4-*b*]pyridine-4-carboxylic acid (61).** Ethyl 6-[4-(methylthio)phenyl]-1-(pyridin-4-ylmethyl)-1H-pyrazolo[3,4-*b*]pyridine-4-carboxylate was prepared using the general procedure for Suzuki coupling of **109** with 4-(methylthio)phenylboronic acid (113 mg, 0.67 mmol, 2.0 equiv). Purification by flash chromatography afforded the ethyl ester of the title compound (100.7 mg, 74%) as a yellow solid:  $R_f$  0.40 (EtOAc);  $^1\text{H}$  NMR (600 MHz,  $\text{CDCl}_3$ )  $\delta$  1.50 (t,  $J = 7.2$  Hz, 3H), 2.53 (s, 3H), 4.54 (q,  $J = 7.2$  Hz, 2H), 5.78 (s, 2H), 7.20 (d,  $J = 6.0$  Hz, 2H), 7.35 (d,  $J = 8.4$  Hz, 2H), 8.08 (d,  $J = 8.4$  Hz, 2H), 8.22 (s, 1H), 8.42 (s, 1H), 8.53 (d,  $J = 6.0$  Hz, 2H);  $^{13}\text{C}$  NMR (150 MHz,  $\text{CDCl}_3$ )  $\delta$  14.5, 15.4, 49.8, 62.2, 112.0, 115.4, 122.7, 126.3, 127.9, 132.4, 134.0, 134.8, 141.7, 145.9, 150.2, 151.9, 156.8, 165.2.

Ethyl 6-[4-(methylthio)phenyl]-1-(pyridin-4-ylmethyl)-1H-pyrazolo[3,4-*b*]pyridine-4-carboxylate (50.0 mg, 0.124 mmol, 1.0 equiv) prepared above was converted to the title compound using the general procedure for ester hydrolysis. Purification by preparative reverse-phase HPLC using method 4 afforded the title compound (46.6 mg, 100%) as a yellow solid:  $R_T$  11.3 min;  $^1\text{H}$  NMR (400 MHz,  $\text{DMSO-}d_6$ )  $\delta$  2.54 (s, 3H), 5.84 (s, 2H), 7.21 (d,  $J = 6.0$  Hz, 2H),

7.40 (d,  $J = 8.4$  Hz, 2H), 8.18 (d,  $J = 8.4$  Hz, 2H), 8.21 (s, 1H), 8.44 (s, 1H), 8.50 (d,  $J = 6.0$  Hz, 2H);  $^{13}\text{C}$  NMR (100 MHz,  $\text{DMSO-}d_6$ )  $\delta$  14.3, 49.0, 111.8, 114.6, 122.3, 125.8, 127.7, 133.4, 134.0, 134.2, 141.1, 146.1, 149.9, 151.4, 155.7, 166.1; HRMS (ESI $^-$ ) calcd for  $\text{C}_{20}\text{H}_{15}\text{N}_4\text{O}_2\text{S} [\text{M} - \text{H}]^-$  375.0921, found 375.0923 (error 0.5 ppm).

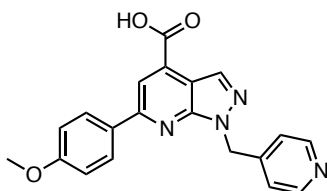

**6-(4-Methoxyphenyl)-1-(pyridin-4-ylmethyl)-1H-pyrazolo[3,4-*b*]pyridine-4-carboxylic acid (62).** Ethyl 6-(4-methoxyphenyl)-1-(pyridin-4-ylmethyl)-1H-pyrazolo[3,4-*b*]pyridine-4-carboxylate was prepared using the general procedure for Suzuki coupling of **109** with 4-methoxyphenylboronic acid (102 mg, 0.67 mmol, 2 equiv). Purification by flash chromatography afforded the ethyl ester of the title compound (102 mg, 78%) as a white solid:  $R_f$  0.33 (EtOAc);  $^1\text{H}$  NMR (600 MHz,  $\text{DMSO-}d_6$ )  $\delta$  1.42 (t,  $J = 7.2$  Hz, 3H), 3.82 (s, 3H), 4.46 (q,  $J = 7.2$  Hz, 2H), 5.82 (s, 2H), 7.05 (d,  $J = 8.4$  Hz, 2H), 7.20 (d,  $J = 6.0$  Hz, 2H), 8.13 (ovlp s, 1H), 8.14 (ovlp d,  $J = 8.4$  Hz, 2H), 8.38 (s, 1H), 8.50 (d,  $J = 6.0$  Hz, 2H);  $^{13}\text{C}$  NMR (150 MHz,  $\text{CDCl}_3$ )  $\delta$  14.0, 49.0, 55.3, 61.8, 110.8, 114.2, 114.4, 122.3, 128.8, 129.8, 131.9, 133.1, 146.1, 149.8, 151.3, 156.0, 161.0, 164.4.

Ethyl 6-(4-methoxyphenyl)-1-(pyridin-4-ylmethyl)-1H-pyrazolo[3,4-*b*]pyridine-4-carboxylate (100 mg, 0.257 mmol, 1.0 equiv) prepared above was converted to the title compound using the general procedure for ester hydrolysis. Purification by preparative reverse-phase HPLC using method 2 afforded the title compound (51 mg, 55%) as a white solid:  $R_T$  7.4 min;  $^1\text{H}$  NMR (600 MHz,  $\text{CD}_3\text{OD}$ )  $\delta$  3.87 (s, 3H), 5.85 (s, 2H), 7.05 (d,  $J = 9.0$  Hz, 2H), 7.30 (d,  $J = 5.4$  Hz, 2H), 8.15 (d,  $J = 9.0$  Hz, 2H), 8.17 (s, 1H), 8.46 (d,  $J = 5.4$  Hz, 2H), 8.48 (s, 1H);  $^{13}\text{C}$

NMR (150 MHz, DMSO-*d*<sub>6</sub>) δ 49.9, 55.3, 111.9, 114.2, 114.4, 122.3, 128.7, 130.4, 133.7, 146.3, 149.9, 151.4, 155.9, 156.5, 160.8, 166.5; HRMS (ESI<sup>-</sup>) calcd for C<sub>20</sub>H<sub>15</sub>N<sub>4</sub>O<sub>3</sub> [M – H]<sup>-</sup> 359.1144, found 359.1154 (error 2.8 ppm).

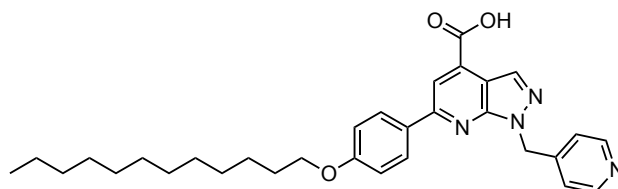

**6-[4-(Dodecyloxy)phenyl]-1-(pyridin-4-ylmethyl)-1H-pyrazolo[3,4-*b*]pyridine-4-carboxylic acid (64).** The title compound was prepared using the general procedure for alkylation of **42-Ethyl ester** and hydrolysis employing dodecylbromide (290 μL, 1.2 mmol) to afford the title compound (38 mg, 24% over two steps) as a white solid: *R*<sub>f</sub> 0.30 (1:4 MeOH/EtOAc); <sup>1</sup>H NMR (600 MHz, DMSO-*d*<sub>6</sub>) δ 0.84 (t, *J* = 7.2 Hz, 3H), 1.23–1.32 (m, 16H), 1.42 (p, *J* = 7.2 Hz, 2H), 1.73 (p, *J* = 7.2 Hz, 2H), 4.03 (t, *J* = 7.2 Hz, 2H), 5.74 (s, 2H), 7.04 (d, *J* = 9.0 Hz, 2H), 7.16 (d, *J* = 5.4 Hz, 2H), 7.95 (s, 1H), 8.09 (d, *J* = 9.0 Hz, 2H), 8.44 (s, 1H), 8.48 (d, *J* = 5.4 Hz, 2H); Due to limited DMSO solubility, the <sup>13</sup>C NMR could not be obtained; HRMS (ESI<sup>-</sup>) calcd for C<sub>31</sub>H<sub>37</sub>N<sub>4</sub>O<sub>3</sub> [M – H]<sup>-</sup> 513.2871, found 513.2837 (error 6.6 ppm).

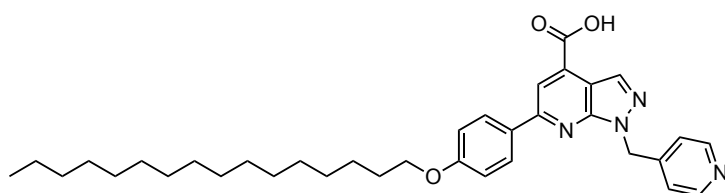

**6-[4-(Hexadecyloxy)phenyl]-1-(pyridin-4-ylmethyl)-1H-pyrazolo[3,4-*b*]pyridine-4-carboxylic acid (65).** The title compound was prepared using the general procedure for alkylation of **42-Ethyl ester** and hydrolysis employing hexadecylbromide (180 μL, 0.6 mmol) to afford the title compound (57 mg, 34% over two steps) as a white solid: *R*<sub>f</sub> 0.40 (1:4 MeOH/EtOAc); <sup>1</sup>H NMR (600 MHz, DMSO-*d*<sub>6</sub>) δ 0.84 (t, *J* = 7.2 Hz, 3H), 1.23–1.34 (m, 24H),

1.42 (p,  $J = 7.2$  Hz, 2H), 1.73 (p,  $J = 7.2$  Hz, 2H), 4.03 (t,  $J = 7.2$  Hz, 2H), 5.75 (s, 2H), 7.05 (d,  $J = 8.7$  Hz, 2H), 7.17 (d,  $J = 4.8$  Hz, 2H), 7.98 (s, 1H), 8.10 (d,  $J = 8.7$  Hz, 2H), 8.43 (s, 1H), 8.48 (d,  $J = 4.8$  Hz, 2H); Due to limited DMSO solubility, the  $^{13}\text{C}$  NMR could not be obtained; HRMS (ESI $^-$ ) calcd for  $\text{C}_{35}\text{H}_{45}\text{N}_4\text{O}_3$   $[\text{M} - \text{H}]^-$  569.3497, found 569.3458 (error 6.9 ppm).

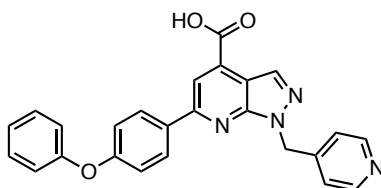

**6-(4-Phenoxyphenyl)-1-(pyridin-4-ylmethyl)-1H-pyrazolo[3,4-b]pyridine-4-carboxylic acid (66).** Ethyl 6-(4-phenoxyphenyl)-1-(pyridin-4-ylmethyl)-1H-pyrazolo[3,4-b]pyridine-4-carboxylate was prepared using the general procedure for Suzuki coupling of **109**, using 4-phenoxyphenylboronic acid (143 mg, 0.67 mmol, 2 equiv). Purification by flash chromatography afforded the ethyl ester of the title compound (105 mg, 70%) as a white solid:  $R_f$  0.51 (EtOAc);  $^1\text{H}$  NMR (600 MHz,  $\text{CDCl}_3$ )  $\delta$  1.51 (t,  $J = 7.2$  Hz, 3H), 4.54 (q,  $J = 7.2$  Hz, 2H), 5.79 (s, 2H), 7.09 (d,  $J = 7.8$  Hz, 2H), 7.12 (d,  $J = 7.8$  Hz, 2H), 7.17 (t,  $J = 7.8$  Hz, 1H), 7.20 (d,  $J = 4.2$  Hz, 2H), 7.38 (t,  $J = 7.8$  Hz, 2H), 8.14 (d,  $J = 7.8$  Hz, 2H), 8.23 (s, 1H), 8.44 (s, 1H), 8.54 (d,  $J = 4.2$  Hz, 2H);  $^{13}\text{C}$  NMR (150 MHz,  $\text{CDCl}_3$ )  $\delta$  14.6, 49.9, 62.3, 112.0, 115.6, 118.8, 119.8, 122.7, 124.2, 129.4, 130.1, 132.5, 133.2, 134.1, 146.0, 150.3, 152.0, 156.6, 156.9, 159.6, 165.3.

Ethyl 6-(4-phenoxyphenyl)-1-(pyridin-4-ylmethyl)-1H-pyrazolo[3,4-b]pyridine-4-carboxylate (50 mg, 0.111 mmol, 1.0 equiv) prepared above was converted to the title compound using the general procedure for ester hydrolysis. Purification by preparative reverse-phase HPLC using method 2 afforded the title compound (48 mg, 99%) as a white solid:  $R_T$  15.2 min;  $^1\text{H}$  NMR (600 MHz,  $\text{CD}_3\text{OD}$ )  $\delta$  5.85 (s, 2H), 7.07 (d,  $J = 7.8$  Hz, 2H), 7.08 (d,  $J = 9.0$  Hz, 2H), 7.16 (t,  $J = 7.8$  Hz, 1H), 7.29 (d,  $J = 5.4$  Hz, 2H), 7.40 (t,  $J = 7.8$  Hz, 2H), 8.16 (s, 1H), 8.19 (d,  $J =$

9.0 Hz, 2H), 8.46 (d,  $J = 5.4$  Hz, 2H), 8.51 (s, 1H);  $^{13}\text{C}$  NMR (150 MHz,  $\text{CD}_3\text{OD}$ )  $\delta$  50.3, 114.4, 115.7, 119.4, 120.5, 124.1, 125.0, 130.2, 131.0, 135.2, 135.9, 143.1, 149.3, 150.3, 153.2, 158.0, 158.2, 160.5, 172.4; HRMS (ESI $^-$ ) calcd for  $\text{C}_{25}\text{H}_{17}\text{N}_4\text{O}_3$   $[\text{M} - \text{H}]^-$  421.1306, found 421.1307 (error 0.7 ppm).

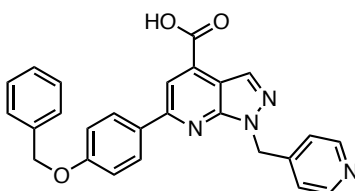

**6-[4-(Benzyloxy)phenyl]-1-(pyridin-4-ylmethyl)-1H-pyrazolo[3,4-*b*]pyridine-4-carboxylic acid (67).** Ethyl 6-[4-(benzyloxy)phenyl]-1-(pyridin-4-ylmethyl)-1H-pyrazolo[3,4-*b*]pyridine-4-carboxylate was prepared using the general procedure for Suzuki coupling of **109** with 4-(benzyloxy)phenylboronic acid (153 mg, 0.67 mmol, 2 equiv). Purification by flash chromatography afforded the ethyl ester of the title compound (129 mg, 83%) as a white solid:  $R_f$  0.43 (EtOAc);  $^1\text{H}$  NMR (600 MHz,  $\text{CDCl}_3$ )  $\delta$  1.51 (t,  $J = 7.2$  Hz, 3H), 4.54 (q,  $J = 7.2$  Hz, 2H), 5.15 (s, 2H), 5.79 (s, 2H), 7.10 (d,  $J = 8.4$  Hz, 2H), 7.20 (d,  $J = 5.4$  Hz, 2H), 7.34 (t,  $J = 7.2$  Hz, 1H), 7.40 (t,  $J = 7.2$  Hz, 2H), 7.46 (d,  $J = 7.2$  Hz, 2H), 8.13 (d,  $J = 8.4$  Hz, 2H), 8.22 (s, 1H), 8.42 (s, 1H), 8.54 (d,  $J = 5.4$  Hz, 2H);  $^{13}\text{C}$  NMR (150 MHz,  $\text{CDCl}_3$ )  $\delta$  14.5, 49.7, 62.1, 70.2, 111.6, 115.4, 122.6, 127.6, 128.3, 128.5, 128.8, 129.1, 131.1, 132.3, 134.0, 136.7, 145.9, 150.3, 152.0, 157.1, 160.6, 165.3.

Ethyl 6-[4-(benzyloxy)phenyl]-1-(pyridin-4-ylmethyl)-1H-pyrazolo[3,4-*b*]pyridine-4-carboxylate (50 mg, 0.108 mmol, 1.0 equiv) prepared above was converted to the title compound using the general procedure for ester hydrolysis. Purification by preparative reverse-phase HPLC using method 2 afforded the title compound (46 mg, 98%) as a white solid:  $R_T$  15.5 min;  $^1\text{H}$  NMR (600 MHz,  $\text{CD}_3\text{OD}$ )  $\delta$  5.16 (s, 2H), 5.83 (s, 2H), 7.11 (d,  $J = 8.4$  Hz, 2H), 7.28–7.32 (m,



3H), 7.38 (t,  $J = 7.8$  Hz, 2H), 7.46 (d,  $J = 7.8$  Hz, 2H), 8.14–8.15 (m, 3H), 8.45 (d,  $J = 6.0$  Hz, 2H), 8.49 (s, 1H);  $^{13}\text{C}$  NMR (150 MHz,  $\text{CD}_3\text{OD}$ )  $\delta$  50.2, 71.1, 114.2, 115.6, 116.2, 124.1, 128.6, 128.9, 129.5, 130.0, 133.0, 135.9, 138.5, 142.9, 149.4, 150.3, 153.2, 158.7, 161.7, 172.5; HRMS (ESI $^-$ ) calcd for  $\text{C}_{26}\text{H}_{19}\text{N}_4\text{O}_3$  [ $\text{M} - \text{H}$ ] $^-$  435.1457, found 435.1471 (error 3.2 ppm).

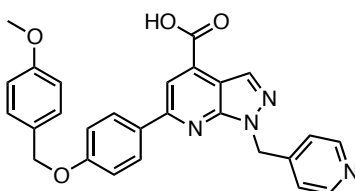

**6-[4-(4-Methoxybenzyloxy)phenyl]-1-(pyridin-4-ylmethyl)-1H-pyrazolo[3,4-*b*]pyridine-4-carboxylic acid (68).** Ethyl 6-[4-(4-methoxybenzyloxy)phenyl]-1-(pyridin-4-ylmethyl)-1H-pyrazolo[3,4-*b*]pyridine-4-carboxylate was prepared using the general procedure for Suzuki coupling of **109** with 4-(4-methoxybenzyloxy)phenylboronic acid (173 mg, 0.67 mmol, 2 equiv). Purification by flash chromatography afforded the ethyl ester of the title compound (143 mg, 86%) as a white solid:  $R_f$  0.39 (EtOAc);  $^1\text{H}$  NMR (600 MHz,  $\text{CDCl}_3$ )  $\delta$  1.50 (t,  $J = 7.2$  Hz, 3H), 3.80 (s, 3H), 4.53 (q,  $J = 7.2$  Hz, 2H), 5.06 (s, 2H), 5.78 (s, 2H), 6.92 (d,  $J = 7.8$  Hz, 2H), 7.09 (d,  $J = 8.4$  Hz, 2H), 7.19 (d,  $J = 4.2$  Hz, 2H), 7.37 (d,  $J = 7.8$  Hz, 2H), 8.12 (d,  $J = 8.4$  Hz, 2H), 8.21 (s, 1H), 8.41 (s, 1H), 8.54 (d,  $J = 4.2$  Hz, 2H);  $^{13}\text{C}$  NMR (150 MHz,  $\text{CDCl}_3$ )  $\delta$  14.4, 49.7, 55.4, 62.1, 70.0, 111.6, 114.2, 115.3, 122.6, 128.7, 129.0, 129.3, 131.0, 132.2, 133.9, 145.9, 150.2, 151.9, 157.0, 159.7, 160.6, 165.3 (missing 1 aryl carbon).

Ethyl 6-[4-(4-methoxybenzyloxy)phenyl]-1-(pyridin-4-ylmethyl)-1H-pyrazolo[3,4-*b*]pyridine-4-carboxylate (50 mg, 0.101 mmol, 1.0 equiv) prepared above was converted to the title compound using the general procedure for ester hydrolysis. Purification by preparative reverse-phase HPLC using method 2 afforded the title compound (45 mg, 95%) as a white solid:  $R_T$  15.2 min;  $^1\text{H}$  NMR (600 MHz,  $\text{CD}_3\text{OD}$ )  $\delta$  3.79 (s, 3H), 5.06 (s, 2H), 5.83 (s, 2H), 6.92 (d,  $J =$

8.4 Hz, 2H), 7.09 (d,  $J = 8.4$  Hz, 2H), 7.28 (d,  $J = 5.4$  Hz, 2H), 7.37 (d,  $J = 8.4$  Hz, 2H), 8.13 (ovlp d,  $J = 8.4$  Hz, 2H), 8.14 (ovlp s, 1H), 8.45 (d,  $J = 5.4$  Hz, 2H), 8.49 (s, 1H);  $^{13}\text{C}$  NMR (150 MHz,  $\text{CD}_3\text{OD}$ )  $\delta$  50.2, 50.7, 70.9, 114.2, 114.9, 115.6, 116.2, 124.1, 129.9, 130.3, 130.4, 132.9, 135.9, 142.9, 149.4, 150.3, 153.2, 158.7, 161.0, 161.8, 172.5; HRMS (ESI $^-$ ) calcd for  $\text{C}_{27}\text{H}_{21}\text{N}_4\text{O}_4$   $[\text{M} - \text{H}]^-$  465.1563, found 465.1539 (error 5.2 ppm).

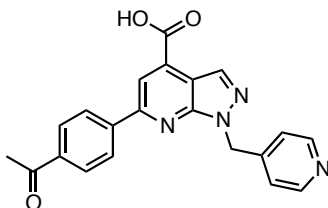

**6-(4-Acetylphenyl)-1-(pyridin-4-ylmethyl)-1H-pyrazolo[3,4-*b*]pyridine-4-carboxylic acid**

**(69).** Ethyl 6-(4-acetylphenyl)-1-(pyridin-4-ylmethyl)-1H-pyrazolo[3,4-*b*]pyridine-4-carboxylate was prepared using the general procedure for Suzuki coupling of **109** with 4-acetylphenylboronic acid (110 mg, 0.67 mmol, 2.0 equiv). Purification by flash chromatography afforded the ethyl ester of the title compound (83.4 mg, 62%) as a pale orange solid:  $R_f$  0.38 (EtOAc);  $^1\text{H}$  NMR (600 MHz,  $\text{CDCl}_3$ )  $\delta$  1.51 (t,  $J = 7.2$  Hz, 3H), 2.65 (s, 3H), 4.54 (q,  $J = 7.2$  Hz, 2H), 5.81 (s, 2H), 7.20 (d,  $J = 6.0$  Hz, 2H), 8.08 (d,  $J = 8.4$  Hz, 2H), 8.23 (d,  $J = 8.4$  Hz, 2H), 8.29 (s, 1H), 8.46 (s, 1H), 8.53 (d,  $J = 6.0$  Hz, 2H);  $^{13}\text{C}$  NMR (150 MHz,  $\text{CDCl}_3$ )  $\delta$  14.4, 26.9, 49.9, 62.3, 112.6, 116.0, 122.6, 127.8, 129.0, 132.6, 134.0, 137.9, 142.4, 145.6, 150.3, 151.9, 155.9, 165.0, 197.7.

Ethyl 6-(4-acetylphenyl)-1-(pyridin-4-ylmethyl)-1H-pyrazolo[3,4-*b*]pyridine-4-carboxylate (50.0 mg, 0.125 mmol, 1.0 equiv) prepared above was converted to the title compound using the general procedure for ester hydrolysis. Purification by preparative reverse-phase HPLC using method 4 afforded the title compound (37.6 mg, 81%) as a pale yellow solid:  $R_T$  9.6 min;  $^1\text{H}$  NMR (400 MHz,  $\text{DMSO}-d_6$ )  $\delta$  2.64 (s, 3H), 5.88 (s, 2H), 7.23 (d,  $J = 6.0$  Hz, 2H), 8.10 (d,  $J = 8.4$  Hz, 2H), 8.31 (s, 1H), 8.37 (d,  $J = 8.4$  Hz, 2H), 8.49 (s, 1H), 8.51 (d,  $J = 6.0$  Hz, 2H);  $^{13}\text{C}$

NMR (100 MHz, DMSO- $d_6$ )  $\delta$  26.9, 49.1, 112.5, 115.3, 122.4, 127.6, 128.8, 133.5, 134.6, 137.5, 141.7, 146.0, 149.9, 151.3, 154.9, 165.9, 197.6; HRMS (ESI<sup>-</sup>) calcd for C<sub>21</sub>H<sub>15</sub>N<sub>4</sub>O<sub>3</sub> [M<sup>-</sup>H] 371.1150, found 371.1156 (error 1.6 ppm).

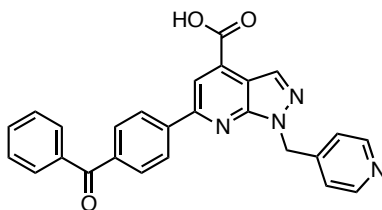

**6-(4-Benzoylphenyl)-1-(pyridin-4-ylmethyl)-1H-pyrazolo[3,4-*b*]pyridine-4-carboxylic acid (70).** Ethyl 6-(4-benzoylphenyl)-1-(pyridin-4-ylmethyl)-1H-pyrazolo[3,4-*b*]pyridine-4-carboxylate was prepared using the general procedure for Suzuki coupling of **109** with 4-benzoylphenylboronic acid (151 mg, 0.67 mmol, 2.0 equiv). Purification by flash chromatography afforded the ethyl ester of the title compound (107.7 mg, 70%) as a pale brown solid:  $R_f$  0.65 (EtOAc); <sup>1</sup>H NMR (600 MHz, CDCl<sub>3</sub>)  $\delta$  1.51 (t,  $J$  = 7.2 Hz, 3H), 4.55 (q,  $J$  = 7.2 Hz, 2H), 5.82 (s, 2H), 7.21 (d,  $J$  = 6.0 Hz, 2H), 7.48–7.51 (m, 2H), 7.59–7.61 (m, 1H), 7.82–7.84 (m, 2H), 7.94 (d,  $J$  = 8.4 Hz, 2H), 8.26 (d,  $J$  = 8.4 Hz, 2H), 8.32 (s, 1H), 8.48 (s, 1H), 8.54 (d,  $J$  = 6.0 Hz, 2H); <sup>13</sup>C NMR (150 MHz, CDCl<sub>3</sub>)  $\delta$  14.5, 49.9, 62.3, 112.6, 116.0, 122.7, 127.5, 128.5, 130.1, 130.7, 132.6, 132.8, 134.1, 137.5, 138.6, 141.8, 145.8, 150.2, 151.9, 156.0, 165.0, 196.2.

Ethyl 6-(4-benzoylphenyl)-1-(pyridin-4-ylmethyl)-1H-pyrazolo[3,4-*b*]pyridine-4-carboxylate (50.0 mg, 0.108 mmol, 1.0 equiv) prepared above was converted to the title compound using the general procedure for ester hydrolysis. Purification by preparative reverse-phase HPLC using method 4 afforded the title compound (31.4 mg, 67%) as a white solid:  $R_T$  12.1 min; <sup>1</sup>H NMR (400 MHz, DMSO- $d_6$ )  $\delta$  5.88 (s, 2H), 7.22 (d,  $J$  = 6.0 Hz, 2H), 7.57–7.61 (m, 2H), 7.69–7.73 (m, 1H), 7.78–7.81 (m, 2H), 7.90 (d,  $J$  = 8.4 Hz, 2H), 8.32 (s, 1H), 8.42 (d,  $J$  = 6.0 Hz, 2H), 8.51 (br s, 3H); <sup>13</sup>C NMR (100 MHz, DMSO- $d_6$ )  $\delta$  49.1, 112.6, 115.3, 122.3, 127.5, 128.6, 129.7, 130.3,

132.9, 133.6, 136.9, 137.8, 141.4, 146.0, 149.9, 151.4, 154.9, 166.0, 195.4 (missing one aryl carbon); HRMS (ESI<sup>-</sup>) calcd for C<sub>26</sub>H<sub>17</sub>N<sub>4</sub>O<sub>3</sub> [M - H]<sup>-</sup> 433.1306, found 433.1308 (error 0.5 ppm).

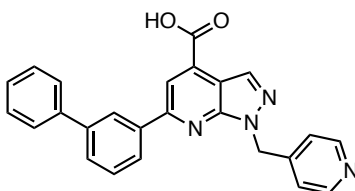

**6-(Biphenyl-3-yl)-1-(pyridin-4-ylmethyl)-1H-pyrazolo[3,4-*b*]pyridine-4-carboxylic acid (71).** Ethyl 6-(biphenyl-3-yl)-1-(pyridin-4-ylmethyl)-1H-pyrazolo[3,4-*b*]pyridine-4-carboxylate was prepared using the general procedure for Suzuki coupling of **109** with biphenyl-3-ylboronic acid (133 mg, 0.67 mmol, 2 equiv). Purification by flash chromatography afforded the ethyl ester of the title compound (97 mg, 73%) as a white solid: *R<sub>f</sub>* 0.43 (EtOAc); <sup>1</sup>H NMR (600 MHz, CDCl<sub>3</sub>) δ 1.52 (t, *J* = 7.2 Hz, 3H), 4.56 (q, *J* = 7.2 Hz, 2H), 5.82 (s, 2H), 7.22 (d, *J* = 5.4 Hz, 2H), 7.41 (t, *J* = 7.8 Hz, 1H), 7.50 (t, *J* = 7.8 Hz, 2H), 7.59 (t, *J* = 7.8 Hz, 1H), 7.67–7.71 (m, 3H), 8.13 (d, *J* = 7.8 Hz, 1H), 8.32 (s, 1H), 8.36 (s, 1H), 8.47 (s, 1H), 8.55 (d, *J* = 5.4 Hz, 2H); <sup>13</sup>C NMR (150 MHz, CDCl<sub>3</sub>) δ 14.5, 49.9, 62.2, 112.3, 116.0, 122.7, 126.58, 126.59, 127.4, 127.8, 128.9, 129.0, 129.5, 132.5, 134.0, 138.9, 141.0, 142.2, 145.8, 150.3, 152.0, 157.4, 165.2.

Ethyl 6-(biphenyl-3-yl)-1-(pyridin-4-ylmethyl)-1H-pyrazolo[3,4-*b*]pyridine-4-carboxylate (50 mg, 0.115 mmol, 1.0 equiv) prepared above was converted to the title compound using the general procedure for ester hydrolysis. Purification by preparative reverse-phase HPLC using method 2 afforded the title compound (45 mg, 95%) as a white solid: *R<sub>T</sub>* 15.4 min; <sup>1</sup>H NMR (600 MHz, CD<sub>3</sub>OD) δ 5.87 (s, 2H), 7.32 (d, *J* = 6.0 Hz, 2H), 7.38 (t, *J* = 7.2 Hz, 1H), 7.48 (d, *J* = 7.8 Hz, 2H), 7.59 (d, *J* = 7.8 Hz, 1H), 7.70–7.72 (m, 3H), 8.17 (d, *J* = 7.2 Hz, 1H), 8.28 (s, 1H), 8.41 (s, 1H), 8.46 (d, *J* = 6.0 Hz, 2H), 8.54 (s, 1H); <sup>13</sup>C NMR (150 MHz, CD<sub>3</sub>OD) δ 50.4, 114.8,

116.2, 124.1, 127.2, 127.5, 128.1, 128.6, 129.2, 129.9, 130.4, 135.9, 140.9, 142.1, 143.1, 149.3, 150.3, 153.2, 158.7, 172.3 (missing one aryl carbon); HRMS (ESI<sup>-</sup>) calcd for C<sub>25</sub>H<sub>17</sub>N<sub>4</sub>O<sub>2</sub> [M - H]<sup>-</sup> 405.1360, found 405.1352 (error 2.0 ppm).

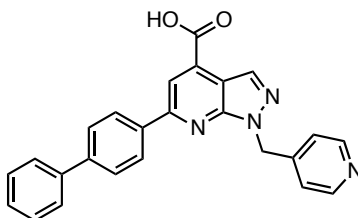

**6-(Biphenyl-4-yl)-1-(pyridin-4-ylmethyl)-1H-pyrazolo[3,4-b]pyridine-4-carboxylic acid (72).** Ethyl 6-(biphenyl-4-yl)-1-(pyridin-4-ylmethyl)-1H-pyrazolo[3,4-b]pyridine-4-carboxylate was prepared using the general procedure for Suzuki coupling of **109** with 4-biphenylboronic acid (133 mg, 0.67 mmol, 2.0 equiv). Purification by flash chromatography afforded the ethyl ester of the title compound (96.8 mg, 67%) as a pale brown solid: *R<sub>f</sub>* 0.41 (EtOAc); <sup>1</sup>H NMR (600 MHz, CDCl<sub>3</sub>) δ 1.53 (t, *J* = 7.2 Hz, 3H), 4.56 (q, *J* = 7.2 Hz, 2H), 5.83 (s, 2H), 7.23 (d, *J* = 6.0 Hz, 2H), 7.40 (t, *J* = 7.2 Hz, 1H), 7.48 (t, *J* = 7.2 Hz, 2H), 7.67 (d, *J* = 7.2 Hz, 2H), 7.76 (d, *J* = 8.7 Hz, 2H), 8.25 (d, *J* = 8.7 Hz, 2H), 8.33 (s, 1H), 8.47 (s, 1H), 8.56 (d, *J* = 6.0 Hz, 2H); <sup>13</sup>C NMR (150 MHz, CDCl<sub>3</sub>) δ 14.5, 49.9, 62.2, 112.2, 115.8, 122.7, 127.3, 127.8, 128.0, 128.1, 129.1, 132.4, 134.1, 137.2, 140.4, 142.9, 145.9, 150.3, 152.0, 157.1, 165.3.

Ethyl 6-(biphenyl-4-yl)-1-(pyridin-4-ylmethyl)-1H-pyrazolo[3,4-b]pyridine-4-carboxylate (50.0 mg, 0.115 mmol, 1.0 equiv) prepared above was converted to the title compound using the general procedure for ester hydrolysis. Purification by preparative reverse-phase HPLC using method 4 afforded the title compound (45.1 mg, 96%) as a white solid: *R<sub>T</sub>* 13.2 min; <sup>1</sup>H NMR (600 MHz, DMSO-*d*<sub>6</sub>) δ 5.86 (s, 2H), 7.22 (d, *J* = 6.0 Hz, 2H), 7.41 (t, *J* = 7.2 Hz, 1H), 7.51 (t, *J* = 7.2 Hz, 2H), 7.76 (d, *J* = 7.2 Hz, 2H), 7.85 (d, *J* = 8.4 Hz, 2H), 8.27 (s, 1H), 8.32 (d, *J* = 8.4 Hz, 2H), 8.48 (s, 1H), 8.51 (d, *J* = 6.0 Hz, 2H); <sup>13</sup>C NMR (150 MHz, DMSO-*d*<sub>6</sub>) δ 49.0, 100.7, 112.4,

114.7, 122.3, 126.7, 127.2, 127.86, 127.91, 129.0, 133.7, 136.9, 139.3, 141.4, 146.2, 149.9, 151.4, 155.6, 166.2; HRMS (ESI<sup>-</sup>) calcd for C<sub>25</sub>H<sub>17</sub>N<sub>4</sub>O<sub>2</sub> [M - H]<sup>-</sup> 405.1357, found 405.1361 (error 1.0 ppm).

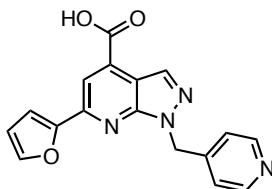

**6-(Furan-2-yl)-1-(pyridin-4-ylmethyl)-1H-pyrazolo[3,4-*b*]pyridine-4-carboxylic acid (75).** Ethyl 6-(furan-2-yl)-1-(pyridin-4-ylmethyl)-1H-pyrazolo[3,4-*b*]pyridine-4-carboxylate was prepared using the general procedure for Suzuki coupling of **109** with furan-2-ylboronic acid (75 mg, 0.67 mmol, 2.0 equiv). Purification by flash chromatography afforded the ethyl ester of the title compound (82.0 mg, 70%) as a brown solid: *R<sub>f</sub>* 0.42 (EtOAc); <sup>1</sup>H NMR (600 MHz, CDCl<sub>3</sub>) δ 1.49 (t, *J* = 7.2 Hz, 3H), 4.52 (q, *J* = 7.2 Hz, 2H), 5.75 (s, 2H), 6.58 (dd, *J* = 3.0, 1.5 Hz, 1H), 7.18 (d, *J* = 4.8 Hz, 2H), 7.22 (d, *J* = 3.0 Hz, 1H), 7.61 (s, 1H), 8.20 (s, 1H), 8.42 (s, 1H), 8.54 (br s, 2H); <sup>13</sup>C NMR (150 MHz, CDCl<sub>3</sub>) δ 14.4, 49.7, 62.2, 111.0, 112.0, 112.6, 114.4, 122.7, 132.4, 134.1, 144.6, 145.8, 149.1, 150.2, 151.7, 153.2, 165.0.

Ethyl 6-(furan-2-yl)-1-(pyridin-4-ylmethyl)-1H-pyrazolo[3,4-*b*]pyridine-4-carboxylate (50.0 mg, 0.144 mmol, 1.0 equiv) prepared above was converted to the title compound using the general procedure for ester hydrolysis. Purification by preparative reverse-phase HPLC using method 4 afforded the title compound (45.2 mg, 98%) as a grey solid: *R<sub>T</sub>* 8.5 min; <sup>1</sup>H NMR (400 MHz, DMSO-*d*<sub>6</sub>) δ 5.72 (s, 2H), 6.68 (dd, *J* = 3.6, 1.6 Hz, 1H), 7.15 (d, *J* = 6.0 Hz, 2H), 7.25 (dd, *J* = 3.6, 0.8 Hz, 1H), 7.89 (dd, *J* = 1.6, 0.8 Hz, 1H), 7.93 (s, 1H), 8.46 (s, 1H), 8.49 (d, *J* = 6.0 Hz, 2H); <sup>13</sup>C NMR (100 MHz, DMSO-*d*<sub>6</sub>) δ 48.7, 110.1, 112.5, 112.8, 113.4, 122.2, 134.9, 143.5,

144.7, 146.5, 147.7, 149.8, 151.2, 153.2, 166.6; HRMS (ESI<sup>-</sup>) calcd for C<sub>17</sub>H<sub>11</sub>N<sub>4</sub>O<sub>3</sub> [M - H]<sup>-</sup> 319.0837, found 319.0833 (error 1.3 ppm).

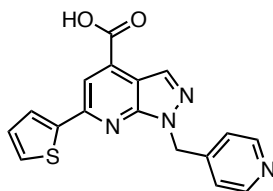

**1-(Pyridin-4-ylmethyl)-6-(thiophen-2-yl)-1H-pyrazolo[3,4-*b*]pyridine-4-carboxylic acid (76).** Ethyl 1-(pyridin-4-ylmethyl)-6-(thiophen-2-yl)-1H-pyrazolo[3,4-*b*]pyridine-4-carboxylate was prepared using the general procedure for Suzuki coupling of **109**, using thiophen-2-ylboronic acid (86 mg, 0.67 mmol, 2 equiv). Purification by flash chromatography afforded the ethyl ester of the title compound (92 mg, 75%) as a white solid: *R<sub>f</sub>* 0.39 (EtOAc); <sup>1</sup>H NMR (600 MHz, CDCl<sub>3</sub>) δ 1.51 (t, *J* = 7.2 Hz, 3H), 4.54 (q, *J* = 7.2 Hz, 2H), 5.75 (s, 2H), 7.16 (dd, *J* = 5.4, 4.2 Hz, 1H), 7.25 (d, *J* = 5.4 Hz, 2H), 7.49 (d, *J* = 5.4 Hz, 1H), 7.80 (d, *J* = 4.2 Hz, 1H), 8.15 (s, 1H), 8.39 (s, 1H), 8.54 (d, *J* = 5.4 Hz, 2H); <sup>13</sup>C NMR (150 MHz, CDCl<sub>3</sub>) δ 14.5, 50.0, 62.3, 112.0, 114.7, 122.9, 127.1, 128.5, 129.4, 132.4, 134.2, 144.2, 145.6, 150.3, 151.5, 152.6, 165.1.

Ethyl 1-(pyridin-4-ylmethyl)-6-(thiophen-2-yl)-1H-pyrazolo[3,4-*b*]pyridine-4-carboxylate (50 mg, 0.137 mmol, 1.0 equiv) prepared above was converted to the title compound using the general procedure for ester hydrolysis. Purification by preparative reverse-phase HPLC using method 2 afforded the title compound (37 mg, 80%) as a white solid: *R<sub>T</sub>* 10.9 min; <sup>1</sup>H NMR (600 MHz, CD<sub>3</sub>OD) δ 5.78 (s, 2H), 7.16 (dd, *J* = 4.8, 4.2 Hz, 1H), 7.32 (d, *J* = 6.0 Hz, 2H), 7.54 (d, *J* = 4.8 Hz, 1H), 7.85 (d, *J* = 4.2 Hz, 1H), 8.10 (s, 1H), 8.46–8.47 (m, 3H); <sup>13</sup>C NMR (150 MHz, CD<sub>3</sub>OD) δ 50.3, 114.5, 114.8, 124.2, 127.7, 129.3, 129.8, 136.0, 143.1, 146.0, 149.1, 150.3, 152.8, 154.1, 172.1; HRMS (ESI<sup>-</sup>) calcd for C<sub>17</sub>H<sub>11</sub>N<sub>4</sub>O<sub>2</sub>S [M - H]<sup>-</sup> 335.0603, found 335.0612 (error 2.7 ppm).

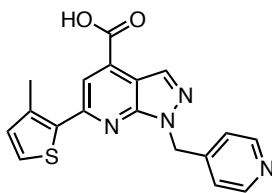

**6-(3-Methylthiophen-2-yl)-1-(pyridin-4-ylmethyl)-1H-pyrazolo[3,4-*b*]pyridine-4-carboxylic acid (77).** Ethyl 6-(3-methylthiophen-2-yl)-1-(pyridin-4-ylmethyl)-1H-pyrazolo[3,4-*b*]pyridine-4-carboxylate was prepared using the general procedure for Suzuki coupling of **109** with 3-methylthiophene-2-boronic acid pinacol ester (150 mg, 0.67 mmol, 2.0 equiv). Purification by flash chromatography afforded the ethyl ester of the title compound (101.6 mg, 80%) as a pale yellow solid:  $R_f$  0.41 (EtOAc);  $^1\text{H}$  NMR (600 MHz,  $\text{CDCl}_3$ )  $\delta$  1.48 (t,  $J = 7.2$  Hz, 3H), 2.58 (s, 3H), 4.51 (q,  $J = 7.2$  Hz, 2H), 5.71 (s, 2H), 6.94 (d,  $J = 5.1$  Hz, 1H), 7.20 (d,  $J = 6.0$  Hz, 2H), 7.32 (d,  $J = 5.1$  Hz, 1H), 8.06 (s, 1H), 8.39 (s, 1H), 8.52 (d,  $J = 6.0$  Hz, 2H);  $^{13}\text{C}$  NMR (150 MHz,  $\text{CDCl}_3$ )  $\delta$  14.4, 16.8, 50.0, 62.1, 111.2, 117.0, 122.7, 126.8, 132.1, 132.8, 133.9, 136.6, 138.2, 145.7, 150.2, 151.3, 153.6, 165.0.

Ethyl 6-(3-methylthiophen-2-yl)-1-(pyridin-4-ylmethyl)-1H-pyrazolo[3,4-*b*]pyridine-4-carboxylate (50.0 mg, 0.132 mmol, 1.0 equiv) prepared above was converted to the title compound using the general procedure for ester hydrolysis. Purification by preparative reverse-phase HPLC using method 4 afforded the title compound (45.5 mg, 98%) as an off-white solid:  $R_T$  10.2 min;  $^1\text{H}$  NMR (400 MHz,  $\text{DMSO-}d_6$ )  $\delta$  2.55 (s, 3H), 5.77 (s, 2H), 7.07 (d,  $J = 5.2$  Hz, 1H), 7.20 (d,  $J = 6.0$  Hz, 2H), 7.64 (d,  $J = 5.2$  Hz, 1H), 7.95 (s, 1H), 8.43 (s, 1H), 8.50 (d,  $J = 6.0$  Hz, 2H);  $^{13}\text{C}$  NMR (100 MHz,  $\text{DMSO-}d_6$ )  $\delta$  16.4, 49.2, 111.2, 115.9, 122.3, 127.5, 133.0, 133.5, 135.9, 137.9, 146.0, 149.9, 150.8, 152.6, 165.9 (missing one aryl carbon); HRMS (ESI $^-$ ) calcd for  $\text{C}_{18}\text{H}_{13}\text{N}_4\text{O}_2\text{S}$  [ $\text{M} - \text{H}$ ] $^-$  349.0765, found 349.0780 (error 4.3 ppm).



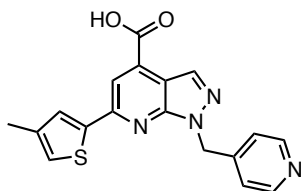

**6-(4-Methylthiophen-2-yl)-1-(pyridin-4-ylmethyl)-1H-pyrazolo[3,4-*b*]pyridine-4-carboxylic acid (78).** Ethyl 6-(4-methylthiophen-2-yl)-1-(pyridin-4-ylmethyl)-1H-pyrazolo[3,4-*b*]pyridine-4-carboxylate was prepared using the general procedure for Suzuki coupling of **109** with 4-methylthiophen-2-ylboronic acid (95 mg, 0.67 mmol, 2.0 equiv). Purification by flash chromatography afforded the ethyl ester of the title compound (98.3 mg, 78%) as a pale yellow solid:  $R_f$  0.45 (EtOAc);  $^1\text{H}$  NMR (600 MHz,  $\text{CDCl}_3$ )  $\delta$  1.50 (t,  $J = 7.2$  Hz, 3H), 2.33 (s, 3H), 4.53 (q,  $J = 7.2$  Hz, 2H), 5.73 (s, 2H), 7.06 (s, 1H), 7.24 (d,  $J = 6.6$  Hz, 2H), 7.62 (s, 1H), 8.10 (s, 1H), 8.39 (s, 1H), 8.54 (d, 6.6 Hz, 2H);  $^{13}\text{C}$  NMR (150 MHz,  $\text{CDCl}_3$ )  $\delta$  14.5, 16.0, 50.0, 62.2, 111.9, 114.7, 123.0, 125.0, 129.3, 132.3, 134.1, 139.2, 143.7, 145.7, 150.3, 151.5, 152.6, 165.1.

Ethyl 6-(4-methylthiophen-2-yl)-1-(pyridin-4-ylmethyl)-1H-pyrazolo[3,4-*b*]pyridine-4-carboxylate (50.0 mg, 0.132 mmol, 1.0 equiv) prepared above was converted to the title compound using the general procedure for ester hydrolysis. Purification by preparative reverse-phase HPLC using method 2 afforded the title compound (45.6 mg, 99%) as an off-white solid:  $R_T$  6.8 min;  $^1\text{H}$  NMR (400 MHz,  $\text{DMSO-}d_6$ )  $\delta$  2.26 (s, 3H), 5.75 (s, 2H), 7.21 (d,  $J = 6.0$  Hz, 2H), 7.34 (s, 1H), 7.88 (s, 1H), 8.11 (s, 1H), 8.39 (s, 1H), 8.51 (d,  $J = 6.0$  Hz, 2H);  $^{13}\text{C}$  NMR (100 MHz,  $\text{DMSO-}d_6$ )  $\delta$  15.5, 49.1, 111.7, 113.9, 122.4, 125.4, 130.0, 133.5, 134.0, 138.8, 142.8, 145.9, 149.9, 150.9, 151.8, 165.9; HRMS (ESI $^-$ ) calcd for  $\text{C}_{18}\text{H}_{13}\text{N}_4\text{O}_2\text{S}$   $[\text{M} - \text{H}]^-$  349.0765, found 349.0755 (error 2.9 ppm).

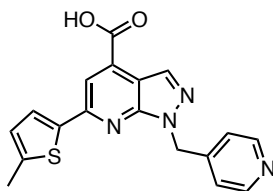

**6-(5-Methylthiophen-2-yl)-1-(pyridin-4-ylmethyl)-1H-pyrazolo[3,4-*b*]pyridine-4-carboxylic acid (79).** Ethyl 6-(5-methylthiophen-2-yl)-1-(pyridin-4-ylmethyl)-1H-pyrazolo[3,4-*b*]pyridine-4-carboxylate was prepared using the general procedure for Suzuki coupling of **109** with 5-methylthiophen-2-ylboronic acid (95 mg, 0.67 mmol, 2 equiv). Purification by flash chromatography afforded the ethyl ester of the title compound (105 mg, 83%) as a white solid:  $R_f$  0.41 (EtOAc);  $^1\text{H}$  NMR (600 MHz,  $\text{CDCl}_3$ )  $\delta$  1.51 (t,  $J = 7.2$  Hz, 3H), 2.56 (s, 3H), 4.53 (q,  $J = 7.2$  Hz, 2H), 5.72 (s, 2H), 6.81 (d,  $J = 3.6$  Hz, 1H), 7.26 (d,  $J = 4.8$  Hz, 2H), 7.59 (d,  $J = 3.6$  Hz, 1H), 8.07 (s, 1H), 8.37 (s, 1H), 8.56 (d,  $J = 4.8$  Hz, 2H);  $^{13}\text{C}$  NMR (150 MHz,  $\text{CDCl}_3$ )  $\delta$  14.4, 15.9, 49.9, 62.1, 111.6, 114.4, 122.9, 126.9, 127.3, 132.1, 134.0, 141.7, 144.6, 145.6, 150.2, 151.5, 152.7, 165.1.

Ethyl 6-(5-methylthiophen-2-yl)-1-(pyridin-4-ylmethyl)-1H-pyrazolo[3,4-*b*]pyridine-4-carboxylate (50 mg, 0.132 mmol, 1.0 equiv) prepared above was converted to the title compound using the general procedure for ester hydrolysis. Purification by preparative reverse-phase HPLC using method 2 afforded the title compound (45 mg, 97%) as a white solid:  $R_T$  12.2 min;  $^1\text{H}$  NMR (600 MHz,  $\text{CD}_3\text{OD}$ )  $\delta$  2.52 (s, 3H), 5.76 (s, 2H), 6.83 (d,  $J = 3.6$  Hz, 1H), 7.31 (d,  $J = 6.0$  Hz, 2H), 7.63 (d,  $J = 3.6$  Hz, 1H), 8.02 (s, 1H), 8.45 (s, 1H), 8.46 (d,  $J = 6.0$  Hz, 2H);  $^{13}\text{C}$  NMR (150 MHz,  $\text{CD}_3\text{OD}$ )  $\delta$  15.5, 50.3, 114.2, 114.5, 124.2, 127.8, 128.0, 136.0, 142.8, 143.6, 145.0, 149.2, 150.3, 152.8, 154.3, 172.2; HRMS (ESI $^-$ ) calcd for  $\text{C}_{18}\text{H}_{13}\text{N}_4\text{O}_2\text{S}$  [ $\text{M} - \text{H}$ ] $^-$  349.0759, found 349.0765 (error 1.7 ppm).

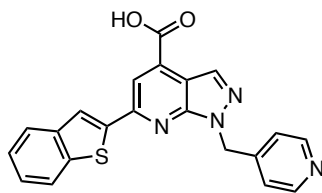

**6-(Benzo[*b*]thiophen-2-yl)-1-(pyridin-4-ylmethyl)-1*H*-pyrazolo[3,4-*b*]pyridine-4-carboxylic acid (80).** Ethyl 6-(benzo[*b*]thiophen-2-yl)-1-(pyridin-4-ylmethyl)-1*H*-pyrazolo[3,4-*b*]pyridine-4-carboxylate was prepared using the general procedure for Suzuki coupling of **109** with benzo[*b*]thiophene-2-boronic acid (119 mg, 0.67 mmol, 2.0 equiv). Purification by flash chromatography afforded the ethyl ester of the title compound (87.4 mg, 63%) as a yellow solid:  $R_f$  0.46 (EtOAc);  $^1\text{H}$  NMR (600 MHz, DMSO- $d_6$ )  $\delta$  1.46 (t,  $J = 7.2$  Hz, 3H), 4.51 (q,  $J = 7.2$  Hz, 2H), 5.81 (s, 2H), 7.25 (d,  $J = 6.0$  Hz, 2H), 7.42–7.45 (m, 2H), 7.93–7.95 (m, 1H), 8.01–8.02 (m, 1H), 8.39 (s, 1H), 8.46 (s, 1H), 8.50 (s, 1H), 8.52 (d,  $J = 6.0$  Hz, 2H);  $^{13}\text{C}$  NMR (150 MHz, DMSO- $d_6$ )  $\delta$  14.1, 49.3, 62.1, 111.8, 114.4, 122.4, 122.8, 124.9, 125.00, 125.03, 126.1, 132.2, 133.6, 140.2, 140.4, 143.2, 145.8, 149.9, 150.8, 151.8, 164.2.

Ethyl 6-(benzo[*b*]thiophen-2-yl)-1-(pyridin-4-ylmethyl)-1*H*-pyrazolo[3,4-*b*]pyridine-4-carboxylate (50.0 mg, 0.121 mmol, 1.0 equiv) prepared above was converted to the title compound using the general procedure for ester hydrolysis. Purification by preparative reverse-phase HPLC using method 4 afforded the title compound (30.7 mg, 66%) as a yellow solid:  $R_T$  12.2 min;  $^1\text{H}$  NMR (400 MHz, DMSO- $d_6$ )  $\delta$  5.78 (s, 2H), 7.24 (d,  $J = 6.0$  Hz, 2H), 7.39–7.43 (m, 2H), 7.91–7.94 (m, 1H), 8.00–8.02 (m, 1H), 8.28 (s, 1H), 8.40 (s, 1H), 8.48 (s, 1H), 8.52 (d,  $J = 6.0$  Hz, 2H);  $^{13}\text{C}$  NMR (150 MHz, DMSO- $d_6$ )  $\delta$  49.0, 113.9, 122.3, 122.5, 123.7, 124.5, 124.7, 125.6, 127.4, 128.2, 134.4, 140.0, 140.2, 144.1, 146.0, 149.8, 150.8, 151.1, 165.9; HRMS (ESI $^-$ ) calcd for  $\text{C}_{21}\text{H}_{13}\text{N}_4\text{O}_2\text{S}$  [ $\text{M} - \text{H}$ ] $^-$  385.0765, found 385.0751 (error 3.6 ppm).

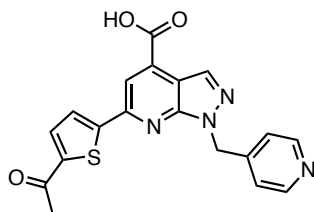

**6-(5-Acetylthiophen-2-yl)-1-(pyridin-4-ylmethyl)-1H-pyrazolo[3,4-*b*]pyridine-4-carboxylic acid (81).** Ethyl 6-(5-acetylthiophen-2-yl)-1-(pyridin-4-ylmethyl)-1H-pyrazolo[3,4-*b*]pyridine-4-carboxylate was prepared using the general procedure for Suzuki coupling of **109** with 5-acetyl-2-thiopheneboronic acid (114 mg, 0.67 mmol, 2.0 equiv). Purification by flash chromatography afforded the ethyl ester of the title compound (92.2 mg, 68%) as a yellow solid:  $R_f$  0.43 (EtOAc);  $^1\text{H}$  NMR (600 MHz,  $\text{CDCl}_3$ )  $\delta$  1.50 (t,  $J = 7.2$  Hz, 3H), 2.60 (s, 3H), 4.54 (q,  $J = 7.2$  Hz, 2H), 5.74 (s, 2H), 7.24 (d,  $J = 6.0$  Hz, 2H), 7.69 (d,  $J = 4.2$  Hz, 1H), 7.75 (d,  $J = 4.2$  Hz, 1H), 8.16 (s, 1H), 8.42 (s, 1H), 8.54 (d,  $J = 6.0$  Hz, 2H);  $^{13}\text{C}$  NMR (150 MHz,  $\text{CDCl}_3$ )  $\delta$  14.5, 26.9, 50.1, 62.4, 112.9, 114.7, 122.9, 127.0, 132.6, 133.1, 134.2, 145.3, 146.2, 150.3, 151.2, 151.30, 151.33, 164.7, 191.0.

Ethyl 6-(5-acetylthiophen-2-yl)-1-(pyridin-4-ylmethyl)-1H-pyrazolo[3,4-*b*]pyridine-4-carboxylate (50.0 mg, 0.123 mmol, 1.0 equiv) prepared above was converted to the title compound using the general procedure for ester hydrolysis. Purification by preparative reverse-phase HPLC using method 4 afforded the title compound (39.3 mg, 84%) as a yellow solid:  $R_T$  9.0 min;  $^1\text{H}$  NMR (600 MHz,  $\text{DMSO-}d_6$ )  $\delta$  2.57 (s, 3H), 5.78 (s, 2H), 7.23 (d,  $J = 6.0$  Hz, 2H), 7.98 (d,  $J = 4.2$  Hz, 1H), 8.15 (d,  $J = 4.2$  Hz, 1H), 8.25 (s, 1H), 8.46 (s, 1H), 8.51 (d,  $J = 6.0$  Hz, 2H);  $^{13}\text{C}$  NMR (150 MHz,  $\text{DMSO-}d_6$ )  $\delta$  26.5, 49.2, 100.6, 113.0, 114.2, 122.4, 128.4, 133.9, 134.9, 145.5, 145.8, 149.9, 150.5, 150.67, 150.74, 165.8, 191.2; HRMS (ESI $^-$ ) calcd for  $\text{C}_{19}\text{H}_{13}\text{N}_4\text{O}_3\text{S}$  [ $\text{M} - \text{H}$ ] $^-$  377.0714, found 377.0717 (error 0.8 ppm).

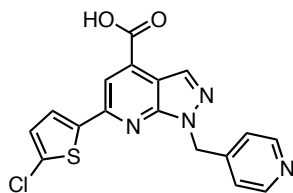

**6-(5-Chlorothiophen-2-yl)-1-(pyridin-4-ylmethyl)-1H-pyrazolo[3,4-*b*]pyridine-4-carboxylic acid (82).** Ethyl 6-(5-chlorothiophen-2-yl)-1-(pyridin-4-ylmethyl)-1H-pyrazolo[3,4-*b*]pyridine-4-carboxylate was prepared using the general procedure for Suzuki coupling of **109** with 5-chlorothiophen-2-ylboronic acid (109 mg, 0.67 mmol, 2 equiv). Purification by flash chromatography afforded the ethyl ester of the title compound (77 mg, 58%) as a white solid:  $R_f$  0.41 (EtOAc);  $^1\text{H}$  NMR (600 MHz,  $\text{CDCl}_3$ )  $\delta$  1.49 (t,  $J = 7.2$  Hz, 3H), 4.52 (q,  $J = 7.2$  Hz, 2H), 5.69 (s, 2H), 6.94 (d,  $J = 3.6$  Hz, 1H), 7.22 (d,  $J = 6.0$  Hz, 2H), 7.51 (d,  $J = 3.6$  Hz, 1H), 8.02 (s, 1H), 8.37 (s, 1H), 8.54 (d,  $J = 6.0$  Hz, 2H);  $^{13}\text{C}$  NMR (150 MHz,  $\text{CDCl}_3$ )  $\delta$  14.4, 50.0, 62.3, 112.1, 113.7, 122.9, 126.1, 127.7, 132.4, 134.1, 134.4, 142.7, 145.4, 150.3, 151.2, 151.5, 164.9.

Ethyl 6-(5-chlorothiophen-2-yl)-1-(pyridin-4-ylmethyl)-1H-pyrazolo[3,4-*b*]pyridine-4-carboxylate (14 mg, 0.035 mmol, 1.0 equiv) prepared above was converted to the title compound using the general procedure for ester hydrolysis. Purification by preparative reverse-phase HPLC using method 2 afforded the title compound (6.1 mg, 47%) as an off-white solid:  $R_T$  13.7 min;  $^1\text{H}$  NMR (600 MHz,  $\text{CD}_3\text{OD}$ )  $\delta$  5.76 (s, 2H), 7.04 (d,  $J = 4.2$  Hz, 1H), 7.31 (d,  $J = 4.8$  Hz, 2H), 7.66 (d,  $J = 4.2$  Hz, 1H), 8.03 (s, 1H), 8.46–8.48 (m, 3H);  $^{13}\text{C}$  NMR (150 MHz,  $\text{CD}_3\text{OD}$ )  $\delta$  50.4, 113.9, 114.8, 124.2, 127.1, 128.9, 134.1, 136.1, 143.3, 145.0, 149.0, 150.3, 152.5, 153.0, 171.8; HRMS (ESI $^-$ ) calcd for  $\text{C}_{17}\text{H}_{10}\text{ClN}_4\text{O}_2\text{S}$  [ $\text{M} - \text{H}$ ] $^-$  369.0213, found 369.0227 (error 3.8 ppm).

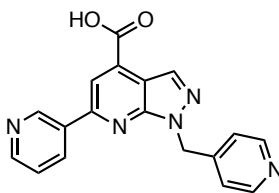

**6-(Pyridin-3-yl)-1-(pyridin-4-ylmethyl)-1*H*-pyrazolo[3,4-*b*]pyridine-4-carboxylic acid**

**(83).** Ethyl 6-(pyridin-3-yl)-1-(pyridin-4-ylmethyl)-1*H*-pyrazolo[3,4-*b*]pyridine-4-carboxylate was prepared using the general procedure for Suzuki coupling of **109** with pyridin-3-ylboronic acid (82 mg, 0.67 mmol, 2 equiv). Purification by flash chromatography afforded the ethyl ester of the title compound (65 mg, 54%) as a white solid:  $R_f$  0.07 (EtOAc);  $^1\text{H}$  NMR (600 MHz,  $\text{CDCl}_3$ )  $\delta$  1.51 (t,  $J = 7.2$  Hz, 3H), 4.55 (q,  $J = 7.2$  Hz, 2H), 5.81 (s, 2H), 7.20 (d,  $J = 5.4$  Hz, 2H), 7.45 (dd,  $J = 4.8, 7.8$  Hz, 1H), 8.26 (s, 1H), 8.42 (d,  $J = 7.8$  Hz, 1H), 8.48 (s, 1H), 8.54 (d,  $J = 5.4$  Hz, 2H), 8.71 (d,  $J = 4.8$  Hz, 1H), 9.39 (s, 1H);  $^{13}\text{C}$  NMR (150 MHz,  $\text{CDCl}_3$ )  $\delta$  14.5, 50.0, 62.4, 112.7, 115.5, 122.7, 123.8, 132.9, 133.9, 134.1, 134.9, 145.6, 149.0, 150.3, 150.9, 151.9, 154.8, 164.9.

Ethyl 6-(pyridin-3-yl)-1-(pyridin-4-ylmethyl)-1*H*-pyrazolo[3,4-*b*]pyridine-4-carboxylate (50 mg, 0.139 mmol, 1.0 equiv) prepared above was converted to the title compound using the general procedure for ester hydrolysis. Purification by preparative reverse-phase HPLC using method 2 afforded the title compound (37 mg, 80%) as a white solid:  $R_T$  8.8 min;  $^1\text{H}$  NMR (600 MHz,  $\text{CD}_3\text{OD}$ )  $\delta$  5.88 (s, 2H), 7.30 (d,  $J = 5.4$  Hz, 2H), 7.59 (dd,  $J = 7.2, 5.4$  Hz, 1H), 8.23 (s, 1H), 8.46 (d,  $J = 5.4$  Hz, 2H), 8.57 (s, 1H), 8.60–8.62 (m, 2H), 9.35 (s, 1H);  $^{13}\text{C}$  NMR (150 MHz,  $\text{CD}_3\text{OD}$ )  $\delta$  50.4, 115.3, 115.8, 124.1, 125.4, 136.0, 136.6, 136.9, 143.5, 149.2, 149.2, 150.4, 150.6, 153.2, 155.5, 171.8; HRMS (ESI $^-$ ) calcd for  $\text{C}_{18}\text{H}_{12}\text{N}_5\text{O}_2$   $[\text{M} - \text{H}]^-$  330.0991, found 330.0995 (error 1.2 ppm).

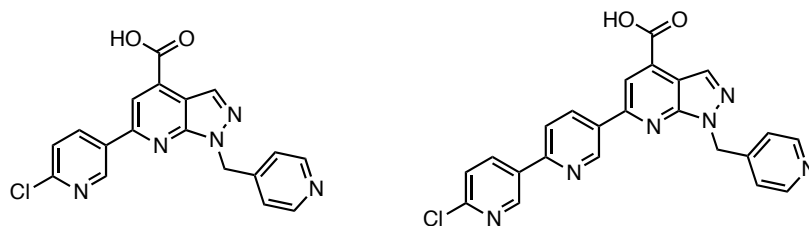

**6-(6-Chloropyridin-3-yl)-1-(pyridin-4-ylmethyl)-1H-pyrazolo[3,4-*b*]pyridine-4-carboxylic acid (84) and 6-(6'-Chloro-2,3'-bipyridin-5-yl)-1-(pyridin-4-ylmethyl)-1H-pyrazolo[3,4-*b*]pyridine-4-carboxylic acid (85).** The ethyl esters of the title compounds were prepared using the general procedure for Suzuki coupling of **109** with 6-chloropyridin-3-ylboronic acid (105 mg, 0.67 mmol, 2.0 equiv). After initial extraction with CH<sub>2</sub>Cl<sub>2</sub> the aqueous phase was back extracted with EtOAc (3 × 10 mL) and the organic extracts were combined and concentrated. Purification by flash chromatography afforded ethyl 6-(6-chloropyridin-3-yl)-1-(pyridin-4-ylmethyl)-1H-pyrazolo[3,4-*b*]pyridine-4-carboxylate (76.4 mg, 58%) and ethyl 6-(6'-chloro-2,3'-bipyridin-5-yl)-1-(pyridin-4-ylmethyl)-1H-pyrazolo[3,4-*b*]pyridine-4-carboxylate (30.3 mg, 19%).

Data for ethyl 6-(6-chloropyridin-3-yl)-1-(pyridin-4-ylmethyl)-1H-pyrazolo[3,4-*b*]pyridine-4-carboxylate: *R<sub>f</sub>* 0.52 (EtOAc); <sup>1</sup>H NMR (600 MHz, CDCl<sub>3</sub>) δ 1.52 (t, *J* = 7.2 Hz, 3H), 4.56 (q, *J* = 7.2 Hz, 2H), 5.80 (s, 2H), 7.19 (d, *J* = 5.4 Hz, 2H), 7.48 (d, *J* = 8.4 Hz, 1H), 8.23 (s, 1H), 8.40 (dd, *J* = 8.4, 2.4 Hz, 1H), 8.49 (s, 1H), 8.55 (d, *J* = 5.4 Hz, 2H), 9.15 (d, *J* = 2.4 Hz, 1H); <sup>13</sup>C NMR (150 MHz, CDCl<sub>3</sub>) δ 14.5, 50.1, 62.5, 112.9, 115.3, 122.6, 124.6, 133.0, 133.1, 134.2, 137.6, 145.5, 148.9, 150.4, 151.9, 153.0, 153.5, 164.8.

Data for ethyl 6-(6'-chloro-2,3'-bipyridin-5-yl)-1-(pyridin-4-ylmethyl)-1H-pyrazolo[3,4-*b*]pyridine-4-carboxylate: *R<sub>f</sub>* 0.44 (EtOAc); <sup>1</sup>H NMR (600 MHz, CDCl<sub>3</sub>) δ 1.53 (t, *J* = 7.2 Hz, 3H), 4.57 (q, *J* = 7.2 Hz, 2H), 5.83 (s, 2H), 7.22 (d, *J* = 6.6 Hz, 2H), 7.47 (d, *J* = 8.4 Hz, 1H),

7.89 (d,  $J = 8.4$  Hz, 1H), 8.32 (s, 1H), 8.40 (dd,  $J = 8.4, 2.4$  Hz, 1H), 8.50 (s, 1H), 8.53–8.56 (m, 3H), 9.06 (d,  $J = 2.4$  Hz, 1H), 9.49 (d,  $J = 2.4$  Hz, 1H);  $^{13}\text{C}$  NMR (150 MHz,  $\text{CDCl}_3$ )  $\delta$  14.5, 50.1, 62.5, 112.8, 115.4, 120.3, 122.7, 124.6, 132.9, 133.2, 133.3, 134.1, 135.9, 137.3, 145.5, 148.3, 149.4, 150.4, 151.9, 152.5, 154.1, 154.5, 164.9.

Ethyl 6-(6-chloropyridin-3-yl)-1-(pyridin-4-ylmethyl)-1*H*-pyrazolo[3,4-*b*]pyridine-4-carboxylate (50.0 mg, 0.127 mmol, 1.0 equiv) prepared above was converted to **84** using the general procedure for ester hydrolysis. Purification by preparative reverse-phase HPLC using method 3 afforded the title compound **84** (16.4 mg, 35%) as a white solid:  $R_T$  9.3 min;  $^1\text{H}$  NMR (600 MHz,  $\text{DMSO-}d_6$ )  $\delta$  5.86 (s, 2H), 7.22 (d,  $J = 5.4$  Hz, 2H), 7.68 (d,  $J = 8.4$  Hz, 1H), 8.28 (s, 1H), 8.49–8.51 (m, 3H), 8.66 (dd,  $J = 8.4, 2.4$  Hz, 1H), 9.24 (d,  $J = 2.4$  Hz, 1H);  $^{13}\text{C}$  NMR (150 MHz,  $\text{DMSO-}d_6$ )  $\delta$  49.1, 100.5, 112.9, 114.9, 122.4, 124.5, 133.0, 133.8, 138.3, 146.0, 148.8, 149.9, 151.2, 151.3, 152.6, 165.9; HRMS (ESI $^-$ ) calcd for  $\text{C}_{18}\text{H}_{11}\text{ClN}_5\text{O}_2$  [ $\text{M} - \text{H}$ ] $^-$  364.0607, found 364.0610 (error 0.8 ppm).

Ethyl 6-(6'-chloro-2,3'-bipyridin-5-yl)-1-(pyridin-4-ylmethyl)-1*H*-pyrazolo[3,4-*b*]pyridine-4-carboxylate (25.0 mg, 0.0531 mmol, 1.0 equiv) prepared above was converted to **85** using the general procedure for ester hydrolysis. Purification by preparative reverse-phase HPLC using method 4 afforded the title compound **85** (18.0 mg, 77%) as a white solid:  $R_T$  10.6 min;  $^1\text{H}$  NMR (600 MHz,  $\text{DMSO-}d_6$ )  $\delta$  5.86 (s, 2H), 7.24 (d,  $J = 5.4$  Hz, 3H), 7.69 (d,  $J = 9.0$  Hz, 1H), 8.24–8.26 (m, 2H), 8.48–8.54 (m, 3H), 8.60 (dd,  $J = 2.4, 9.0$  Hz, 1H), 8.70 (dd,  $J = 2.4, 9.0$  Hz, 1H), 9.19 (d,  $J = 2.4$  Hz, 1H), 9.52 (d,  $J = 2.4$  Hz, 1H);  $^{13}\text{C}$  NMR (150 MHz,  $\text{DMSO-}d_6$ )  $\delta$  49.1, 114.0, 114.5, 121.0, 122.5, 124.6, 133.2, 133.8, 134.1, 134.8, 136.0, 137.8, 146.6, 148.3, 148.7,



149.9, 151.0, 151.5, 152.9, 153.1, 166.4; HRMS (ESI<sup>-</sup>) calcd for C<sub>23</sub>H<sub>14</sub>ClN<sub>6</sub>O<sub>2</sub> [M - H]<sup>-</sup> 441.0872, found 441.0881 (error 2.0 ppm).

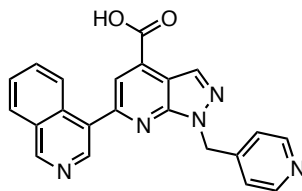

**6-(Isoquinolin-4-yl)-1-(pyridin-4-ylmethyl)-1H-pyrazolo[3,4-*b*]pyridine-4-carboxylic acid (86).** Ethyl 6-(isoquinolin-4-yl)-1-(pyridin-4-ylmethyl)-1H-pyrazolo[3,4-*b*]pyridine-4-carboxylate was prepared using the general procedure for Suzuki coupling of **109** with isoquinolin-4-ylboronic acid (116 mg, 0.67 mmol, 2.0 equiv). Purification by flash chromatography afforded the ethyl ester of the title compound (100 mg, 73%) as a grey solid: *R<sub>f</sub>* 0.16 (EtOAc); <sup>1</sup>H NMR (600 MHz, CDCl<sub>3</sub>) δ 1.48 (t, *J* = 7.2 Hz, 3H), 4.53 (q, *J* = 7.2 Hz, 2H), 5.78 (s, 2H), 7.18 (d, *J* = 6.0 Hz, 2H), 7.61–7.65 (m, 2H), 8.02–8.05 (m, 2H), 8.11 (s, 1H), 8.54 (d, *J* = 6.0 Hz, 2H), 8.56 (s, 1H), 8.74 (s, 1H), 9.31 (s, 1H); <sup>13</sup>C NMR (150 MHz, CDCl<sub>3</sub>) δ 14.4, 50.2, 62.3, 112.5, 119.8, 122.6, 124.4, 127.7, 128.3, 128.6, 130.7, 131.3, 132.6, 133.6, 134.0, 144.3, 145.7, 150.3, 151.6, 153.9, 156.3, 164.8.

Ethyl 6-(isoquinolin-4-yl)-1-(pyridin-4-ylmethyl)-1H-pyrazolo[3,4-*b*]pyridine-4-carboxylate (50.0 mg, 0.122 mmol, 1.0 equiv) prepared above was converted to the title compound using the general procedure for ester hydrolysis. Purification by preparative reverse-phase HPLC using method 4 afforded the title compound (45.4 mg, 98%) as a white solid: *R<sub>T</sub>* 9.5 min; <sup>1</sup>H NMR (400 MHz, DMSO-*d*<sub>6</sub>) δ 5.84 (s, 2H), 7.15–7.25 (m, 2H), 7.69–7.77 (m, 2H), 8.03–8.08 (m, 2H), 8.25 (d, *J* = 8.0 Hz, 1H), 8.54–8.57 (m, 3H), 8.77 (s, 1H), 9.44 (s, 1H); <sup>13</sup>C NMR (150 MHz, DMSO-*d*<sub>6</sub>) δ 49.5, 112.2, 119.2, 122.1, 122.3, 124.0, 128.1, 130.0, 131.4, 132.7, 133.4, 143.7,

144.0, 146.0, 149.8, 150.0, 151.1, 153.8, 155.5, 165.8; HRMS (ESI<sup>-</sup>) calcd for C<sub>22</sub>H<sub>14</sub>N<sub>5</sub>O<sub>2</sub> [M – H]<sup>-</sup> 380.1153, found 380.1158 (error 1.3 ppm).

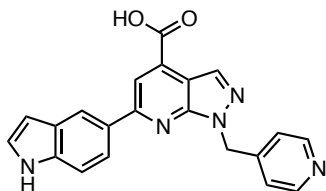

**6-(1*H*-Indol-5-yl)-1-(pyridin-4-ylmethyl)-1*H*-pyrazolo[3,4-*b*]pyridine-4-carboxylic acid (87).** Ethyl 6-(1*H*-indol-5-yl)-1-(pyridin-4-ylmethyl)-1*H*-pyrazolo[3,4-*b*]pyridine-4-carboxylate was prepared using the general procedure for Suzuki coupling of **109**, using 5-(4,4,5,5-tetramethyl-1,3,2-dioxaborolan-2-yl)-1*H*-indole (163 mg, 0.67 mmol, 2 equiv). Purification by flash chromatography afforded the ethyl ester of the title compound (125 mg, 94%) as a white solid: *R<sub>f</sub>* 0.33 (EtOAc); <sup>1</sup>H NMR (600 MHz, CDCl<sub>3</sub>) δ 1.51 (t, *J* = 7.2 Hz, 3H), 4.55 (q, *J* = 7.2 Hz, 2H), 5.82 (s, 2H), 6.66 (s, 1H), 7.23 (d, *J* = 6.0 Hz, 2H), 7.26 (s, 1H), 7.48 (d, *J* = 8.4 Hz, 1H), 8.04 (dd, *J* = 8.4, 1.2 Hz, 2H), 8.35 (s, 1H), 8.43 (s, 1H), 8.46 (s, 1H), 8.54 (d, *J* = 6.0 Hz, 2H), 8.85 (br s, 1H); <sup>13</sup>C NMR (150 MHz, CDCl<sub>3</sub>) δ 14.5, 49.7, 62.1, 103.6, 111.4, 111.7, 116.1, 120.7, 121.8, 122.8, 125.6, 128.5, 130.3, 132.1, 134.0, 137.2, 146.4, 150.0, 152.1, 159.0, 165.5.

Ethyl 6-(1*H*-indol-5-yl)-1-(pyridin-4-ylmethyl)-1*H*-pyrazolo[3,4-*b*]pyridine-4-carboxylate (63 mg, 0.159 mmol, 1.0 equiv) prepared above was converted to the title compound using the general procedure for ester hydrolysis. Purification by preparative reverse-phase HPLC using method 2 afforded the title compound (48 mg, 82%) as a white solid: *R<sub>T</sub>* 9.0 min; <sup>1</sup>H NMR (600 MHz, CD<sub>3</sub>OD) δ 5.85 (s, 2H), 6.56 (d, *J* = 3.0 Hz, 1H), 7.28 (d, *J* = 3.0 Hz, 1H), 7.30 (d, *J* = 6.0 Hz, 2H), 7.48 (d, *J* = 7.8 Hz, 1H), 7.99 (dd, *J* = 7.8, 1.8 Hz, 1H), 8.27 (s, 1H), 8.40 (br s, 1H), 8.46 (d, *J* = 6.0 Hz, 2H), 8.49 (s, 1H); <sup>13</sup>C NMR (150 MHz, CD<sub>3</sub>OD) δ 50.2, 103.5, 112.5, 113.7,

116.4, 121.2, 122.2, 124.1, 126.8, 129.9, 131.4, 135.7, 138.8, 141.3, 149.4, 150.3, 153.3, 161.0, 172.1; HRMS (ESI<sup>-</sup>) calcd for C<sub>21</sub>H<sub>14</sub>N<sub>5</sub>O<sub>2</sub> [M – H]<sup>-</sup> 368.1147, found 368.1155 (error 2.2 ppm).

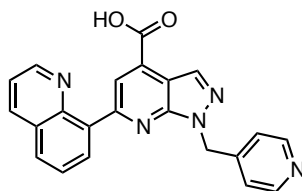

**1-(Pyridin-4-ylmethyl)-6-(quinolin-8-yl)-1H-pyrazolo[3,4-*b*]pyridine-4-carboxylic acid (88).** Ethyl 1-(pyridin-4-ylmethyl)-6-(quinolin-8-yl)-1H-pyrazolo[3,4-*b*]pyridine-4-carboxylate was prepared using the general procedure for Suzuki coupling of **109**, using quinolin-8-ylboronic acid (116 mg, 0.67 mmol, 2.0 equiv). Purification by flash chromatography afforded the ester (88.5 mg, 65%) as a gray solid:  $R_f = 0.26$  (EtOAc); <sup>1</sup>H NMR (600 MHz, CDCl<sub>3</sub>) δ 1.47 (t,  $J = 7.2$  Hz, 3H), 4.52 (q,  $J = 7.2$  Hz, 2H), 5.82 (s, 2H), 7.18 (d,  $J = 6.0$  Hz, 2H), 7.46 (dd,  $J = 8.4, 4.2$  Hz, 1H), 7.68 (t,  $J = 7.8$  Hz, 1H), 7.94 (dd,  $J = 8.4, 1.2$  Hz, 1H), 8.11 (dd,  $J = 7.2, 1.2$  Hz, 1H), 8.24 (dd,  $J = 7.8, 1.8$  Hz, 1H), 8.50–8.54 (m, 3H), 8.58 (s, 1H), 8.96 (dd,  $J = 4.2, 1.8$  Hz, 1H); <sup>13</sup>C NMR (150 MHz, CDCl<sub>3</sub>) δ 14.4, 49.8, 61.9, 112.1, 121.5, 122.4, 122.6, 126.5, 128.8, 129.8, 130.8, 131.7, 134.0, 136.6, 138.3, 145.96, 146.02, 150.2, 150.8, 152.0, 158.0, 165.4.

Ethyl 1-(pyridin-4-ylmethyl)-6-(quinolin-8-yl)-1H-pyrazolo[3,4-*b*]pyridine-4-carboxylate (50.0 mg, 0.122 mmol, 1.0 equiv) prepared above was converted to the title compound using the general procedure for ester hydrolysis. Purification by preparative reverse-phase HPLC using method 4 afforded the title compound (31.9 mg, 69%) as a white solid:  $R_T$  9.7 min; <sup>1</sup>H NMR (400 MHz, DMSO-*d*<sub>6</sub>) δ 5.85 (s, 2H), 7.21 (d,  $J = 6.0$  Hz, 2H), 7.63 (dd,  $J = 8.2, 4.0$  Hz, 1H), 7.78 (t,  $J = 7.6$  Hz, 1H), 8.14–8.18 (m, 2H), 8.45 (s, 1H), 8.50–8.51 (m, 4H), 8.98 (dd,  $J = 4.0, 1.6$  Hz, 1H); <sup>13</sup>C NMR (150 MHz, DMF-*d*<sub>7</sub>) δ 50.5, 113.0, 122.9, 123.4, 123.6, 127.6, 129.9,

131.2, 132.4, 132.8, 134.5, 138.0, 138.9, 146.8, 147.6, 151.1, 152.0, 152.9, 158.6, 167.6; HRMS (ESI<sup>-</sup>) calcd for C<sub>22</sub>H<sub>14</sub>N<sub>5</sub>O<sub>2</sub> [M – H]<sup>-</sup> 380.1153, found 380.1150 (error 0.8 ppm).

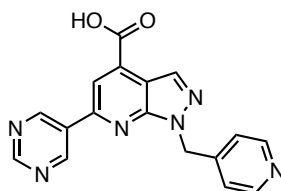

**1-(Pyridin-4-ylmethyl)-6-(pyrimidin-5-yl)-1H-pyrazolo[3,4-b]pyridine-4-carboxylic acid (89).** Ethyl 1-(pyridin-4-ylmethyl)-6-(pyrimidin-5-yl)-1H-pyrazolo[3,4-b]pyridine-4-carboxylate was prepared using the general procedure for Suzuki coupling of **109** with pyrimidin-5-ylboronic acid (83 mg, 0.67 mmol, 2 equiv). Purification by flash chromatography afforded the ethyl ester of the title compound (102 mg, 84%) as a white solid: *R<sub>f</sub>* 0.09 (EtOAc); <sup>1</sup>H NMR (600 MHz, CDCl<sub>3</sub>) δ 1.51 (t, *J* = 7.2 Hz, 3H), 4.56 (q, *J* = 7.2 Hz, 2H), 5.81 (s, 2H), 7.19 (d, *J* = 6.0 Hz, 2H), 8.25 (s, 1H), 8.51 (s, 1H), 8.54 (d, *J* = 6.0 Hz, 2H), 9.30 (s, 1H), 9.46 (s, 2H); <sup>13</sup>C NMR (150 MHz, CDCl<sub>3</sub>) δ 14.4, 50.1, 62.5, 113.2, 115.0, 122.6, 131.7, 133.3, 134.2, 145.3, 150.3, 151.78, 151.83, 155.7, 159.34, 164.6.

Ethyl 1-(pyridin-4-ylmethyl)-6-(pyrimidin-5-yl)-1H-pyrazolo[3,4-b]pyridine-4-carboxylate (50 mg, 0.139 mmol, 1.0 equiv) prepared above was converted to the title compound using the general procedure for ester hydrolysis. Purification by preparative reverse-phase HPLC using method 2 afforded the title compound (24 mg, 53%) as a white solid: *R<sub>T</sub>* 5.1 min; <sup>1</sup>H NMR (600 MHz, CD<sub>3</sub>OD) δ 5.89 (s, 2H), 7.31 (d, *J* = 6.0 Hz, 2H), 8.25 (s, 1H), 8.47 (d, *J* = 6.0 Hz, 2H), 8.59 (s, 1H), 9.22 (s, 1H), 9.55 (s, 2H); <sup>13</sup>C NMR (150 MHz, CD<sub>3</sub>OD) δ 50.5, 115.6, 115.8, 124.1, 134.1, 136.1, 143.9, 149.1, 150.4, 152.7, 153.1, 156.8, 159.3, 171.5; HRMS (ESI<sup>-</sup>) calcd for C<sub>17</sub>H<sub>11</sub>N<sub>6</sub>O<sub>2</sub> [M – H]<sup>-</sup> 331.0943, found 331.0949 (error 1.8 ppm).

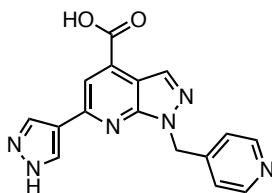

**6-(1H-Pyrazol-4-yl)-1-(pyridin-4-ylmethyl)-1H-pyrazolo[3,4-*b*]pyridine-4-carboxylic acid (90).** Ethyl 6-(1H-pyrazol-4-yl)-1-(pyridin-4-ylmethyl)-1H-pyrazolo[3,4-*b*]pyridine-4-carboxylate was prepared using the general procedure for Suzuki coupling of **109**, using 1H-pyrazole-4-boronic acid pinacol ester (130 mg, 0.67 mmol, 2.0 equiv). After initial extraction with DCM the aqueous phase was back extracted with EtOAc (15 mL) and the organic extracts were combined and concentrated. Purification by flash chromatography afforded the ester (24.0 mg, 21%) as a brown oil:  $R_f = 0.50$  (10% MeOH/EtOAc);  $^1\text{H NMR}$  (600 MHz,  $\text{CDCl}_3$ )  $\delta$  1.50 (t,  $J = 7.2$  Hz, 3H), 4.53 (q,  $J = 7.2$  Hz, 2H), 5.75 (s, 2H), 7.19 (d,  $J = 6.0$  Hz, 2H), 7.97 (s, 1H), 8.24 (br s, 2H), 8.39 (s, 1H), 8.53 (d,  $J = 6.0$  Hz, 2H);  $^{13}\text{C NMR}$  (150 MHz,  $\text{CDCl}_3$ )  $\delta$  14.5, 49.7, 62.2, 111.5, 115.6, 122.7, 122.8, 132.3, 133.5 (broad), 134.1, 146.2, 150.1, 151.9, 152.1, 165.2.

Ethyl 6-(1H-pyrazol-4-yl)-1-(pyridin-4-ylmethyl)-1H-pyrazolo[3,4-*b*]pyridine-4-carboxylate (20.0 mg, 0.0574 mmol, 1.0 equiv) prepared above was converted to the title compound using the general procedure for ester hydrolysis. Purification by preparative reverse-phase HPLC using method 4 afforded the title compound (18.4 mg, 100%) as a brown solid:  $R_T$  8.3 min;  $^1\text{H NMR}$  (400 MHz,  $\text{DMSO-}d_6$ )  $\delta$  5.78 (s, 2H), 7.22 (d,  $J = 6.0$  Hz, 2H), 8.02 (s, 1H), 8.35 (s, 1H), 8.42 (br s, 2H), 8.51 (d,  $J = 6.0$  Hz, 2H);  $^{13}\text{C NMR}$  (100 MHz,  $\text{DMSO-}d_6$ )  $\delta$  48.8, 110.9, 115.1, 121.6, 122.4, 122.5, 133.3, 133.6, 146.2, 149.8, 151.3, 152.3, 166.2; HRMS (ESI $^-$ ) calcd for  $\text{C}_{16}\text{H}_{11}\text{N}_6\text{O}_2$  [ $\text{M} - \text{H}$ ] $^-$  319.0949, found 319.0944 (error 1.6 ppm).

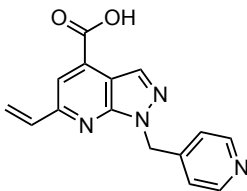

**1-(Pyridin-4-ylmethyl)-6-vinyl-1H-pyrazolo[3,4-b]pyridine-4-carboxylic acid (91).** Ethyl 1-pyridin-4-ylmethyl-6-vinyl-1H-pyrazolo[3,4-b]pyridine-4-carboxylate was prepared using the general procedure for Suzuki coupling of **109** (0.5 mmol, 1.0 equiv) with vinyl boronic acid pinacolate (154 mg, 1 mmol, 2.0 equiv). Purification by flash chromatography afforded the ethyl ester of the title compound (117 mg, 76%) as a white solid:  $R_f$  0.28 (EtOAc);  $^1\text{H}$  NMR (600 MHz,  $\text{CD}_3\text{OD}$ ):  $\delta$  1.48 (t,  $J = 7.2$  Hz, 3H), 4.51 (q,  $J = 7.2$  Hz, 2H), 5.65 (d,  $J = 11.1$  Hz, 1H), 5.74 (s, 2H), 6.40 (d,  $J = 17.4$  Hz, 1H), 6.95 (dd,  $J = 17.4, 11.1$  Hz, 1H), 7.16 (d,  $J = 6.0$  Hz, 2H), 7.86 (s, 1H), 8.40 (s, 1H), 8.52 (d,  $J = 6.0$  Hz, 2H);  $^{13}\text{C}$  NMR (150 MHz,  $\text{CDCl}_3$ ):  $\delta$  14.4, 49.7, 62.1, 112.4, 116.6, 121.0, 122.7, 132.0, 134.0, 136.6, 146.0, 150.0, 151.7, 156.0, 165.1; HRMS (ESI+) calcd for  $\text{C}_{17}\text{H}_{17}\text{N}_4\text{O}_2$   $[\text{M} + \text{H}]^+$  309.1346, found 309.1364 (error 5.8 ppm).

Ethyl 1-pyridin-4-ylmethyl-6-vinyl-1H-pyrazolo[3,4-b]pyridine-4-carboxylate prepared above (47 mg, 0.15 mmol) was converted to the title compound using the general procedure for ester hydrolysis. Purification by preparative reverse-phase HPLC using method 8 followed by lyophilisation of the pooled product fractions afforded the title compound (15 mg, 36%) as a white solid:  $R_T = 12.5$  min;  $^1\text{H}$  NMR (600 MHz,  $\text{CD}_3\text{OD}$ )  $\delta$  5.65 (d,  $J = 10.8$  Hz, 1H), 5.82 (s, 2H), 6.43 (d,  $J = 18.0$  Hz, 1H), 6.96 (dd,  $J = 18.0, 10.8$  Hz, 1H), 7.26 (d,  $J = 6.0$  Hz, 2H), 7.92 (s, 1H), 8.45 (ovlp d,  $J = 6.0$  Hz, 2H), 8.46 (ovlp s, 1H);  $^{13}\text{C}$  NMR (150 MHz,  $\text{D}_2\text{O}$ , internal standard: MeOH)  $\delta$  49.8, 113.7, 115.6, 122.5, 123.3, 135.1, 136.6, 141.4, 148.7, 149.1, 151.6, 157.9, 173.0. HRMS (ESI-) calcd for  $\text{C}_{15}\text{H}_{11}\text{N}_4\text{O}_2$   $[\text{M} - \text{H}]^-$  279.0887, found: 279.0877 (error 3.6 ppm).

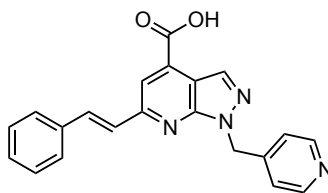

**(E)-1-(Pyridin-4-ylmethyl)-6-styryl-1H-pyrazolo[3,4-b]pyridine-4-carboxylic acid (92).**

(E)-ethyl 1-(pyridin-4-ylmethyl)-6-styryl-1H-pyrazolo[3,4-b]pyridine-4-carboxylate was prepared using the general procedure for Suzuki coupling of **109** (0.5 mmol, 1.0 equiv) with (E)-styrylboronic acid (148 mg, 1 mmol, 2.0 equiv). Purification by flash chromatography afforded the ethyl ester of the title compound (166 mg, 86%) as a yellow solid:  $R_f$  0.39 (EtOAc);  $^1\text{H}$  NMR (600 MHz,  $\text{CD}_3\text{OD}$ )  $\delta$  1.49 (t,  $J = 7.2$  Hz, 3H), 4.51 (q,  $J = 7.2$  Hz, 2H), 5.83 (s, 2H), 7.27–7.28 (m, 2H), 7.32–7.34 (m, 1H), 7.36–7.39 (m, 3H), 7.62–7.64 (m, 2H), 7.80–7.82 (m, 1H), 7.94 (s, 1H), 8.39 (s, 1H), 8.46–8.47 (m, 2H);  $^{13}\text{C}$  NMR (150 MHz,  $\text{CD}_3\text{OD}$ )  $\delta$  14.7, 50.5, 63.3, 113.3, 118.7, 124.2, 128.4, 128.6, 130.0, 130.2, 133.5, 135.0, 136.9, 137.7, 149.1, 150.5, 153.2, 157.9, 166.3; HRMS calcd for  $\text{C}_{23}\text{H}_{21}\text{N}_4\text{O}_2$   $[\text{M} + \text{H}]^+$  385.1659, found 385.1678 (error 4.9 ppm).

(E)-ethyl 1-(pyridin-4-ylmethyl)-6-styryl-1H-pyrazolo[3,4-b]pyridine-4-carboxylate prepared above (77 mg, 0.20 mmol) was converted to the title compound using the general procedure for ester hydrolysis. Purification by preparative reverse-phase HPLC using followed by lyophilisation of the pooled product fractions afforded the title compound (26 mg, 36%) as a yellow solid:  $^1\text{H}$  NMR (600 MHz,  $\text{CD}_3\text{OD}$ )  $\delta$  1.49 (t,  $J = 7.2$  Hz, 3H), 4.51 (q,  $J = 7.2$  Hz, 2H), 5.83 (s, 2H), 7.28–7.39 (m, 6H), 7.62–7.64 (m, 2H), 7.80–7.82 (m, 1H), 7.94 (s, 1H), 8.39 (s, 1H), 8.46–8.47 (m, 2H); HRMS calcd for  $\text{C}_{21}\text{H}_{15}\text{N}_4\text{O}_2^-$   $[\text{M} - \text{H}]^-$  355.1200, found 355.1184 (error 4.5 ppm).

STANDARD 1H OBSERVE - profile

Automation directory: /export/home/neres/vnmrSYS/data/auto\_2009.05.22\_01  
File : 20090522\_01/Proton\_01.fid  
Sample id : 20090522\_01  
Sample : JPN-II-259\_HPLC

Pulse Sequence: s2pu1

Solvent: cd3od  
Temp. 25.0 C / 298.1 K  
Operator: neres  
File: Proton\_01  
VNMRS-600 "nmr600"

Relax. delay 1.000 sec  
Pulse 45.0 degrees  
Acq. time 2.049 sec  
Width 9615.4 Hz  
64 repetitions  
OBSERVE H1, 599.607342 MHz  
DATA PROCESSING  
Line broadening 0.2 Hz  
FT size 65536  
Total time 3 min, 21 sec

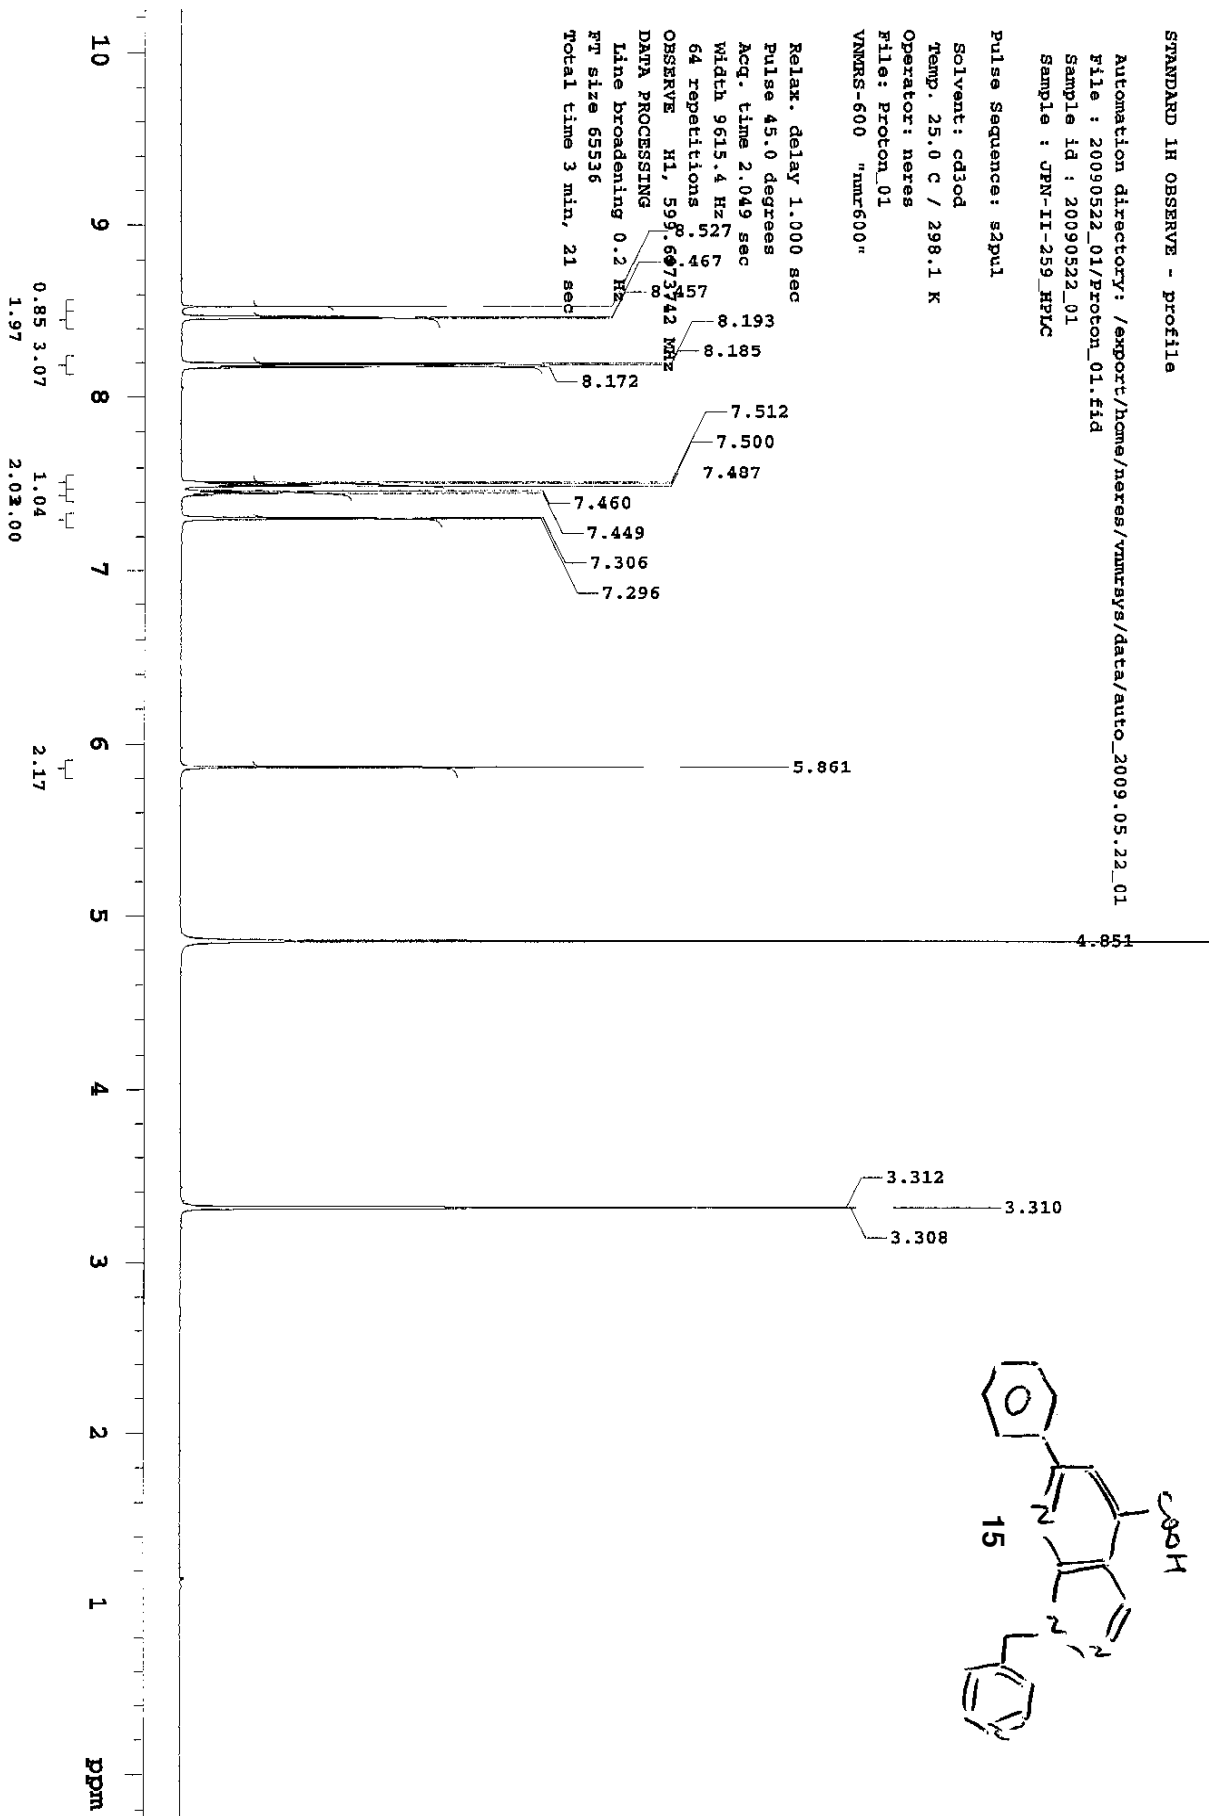

vison for proton



STANDARD 1H OBSERVE - profile

Automation directory: /export/home/neres/vnmrSYS/data/auto\_2009.04.15  
File : 20090415\_02/Carbon\_01.fid  
Sample id : 20090415\_02  
Sample : JPN-IR-215-9

Pulse Sequence: s2pul1

Solvent: cd3od  
Temp. 25.0 C / 298.1 K  
Operator: neres  
File: Carbon\_01  
VWRRS-600 "nmr600"

Relax. delay 2.000 sec  
Pulse 45.0 degrees  
Acq. time 1.300 sec  
Width 36764.7 Hz  
464 repetitions  
OBSERVE C13, 150.7938087 MHz  
DECOUPLE H1, 599.7003771 MHz  
Power 37 dB  
continuously on  
WALTZ-16 modulated  
DATA PROCESSING  
Line broadening 1.0 Hz  
F2 size 131072  
Total time 1 hr, 50 min, 18 sec

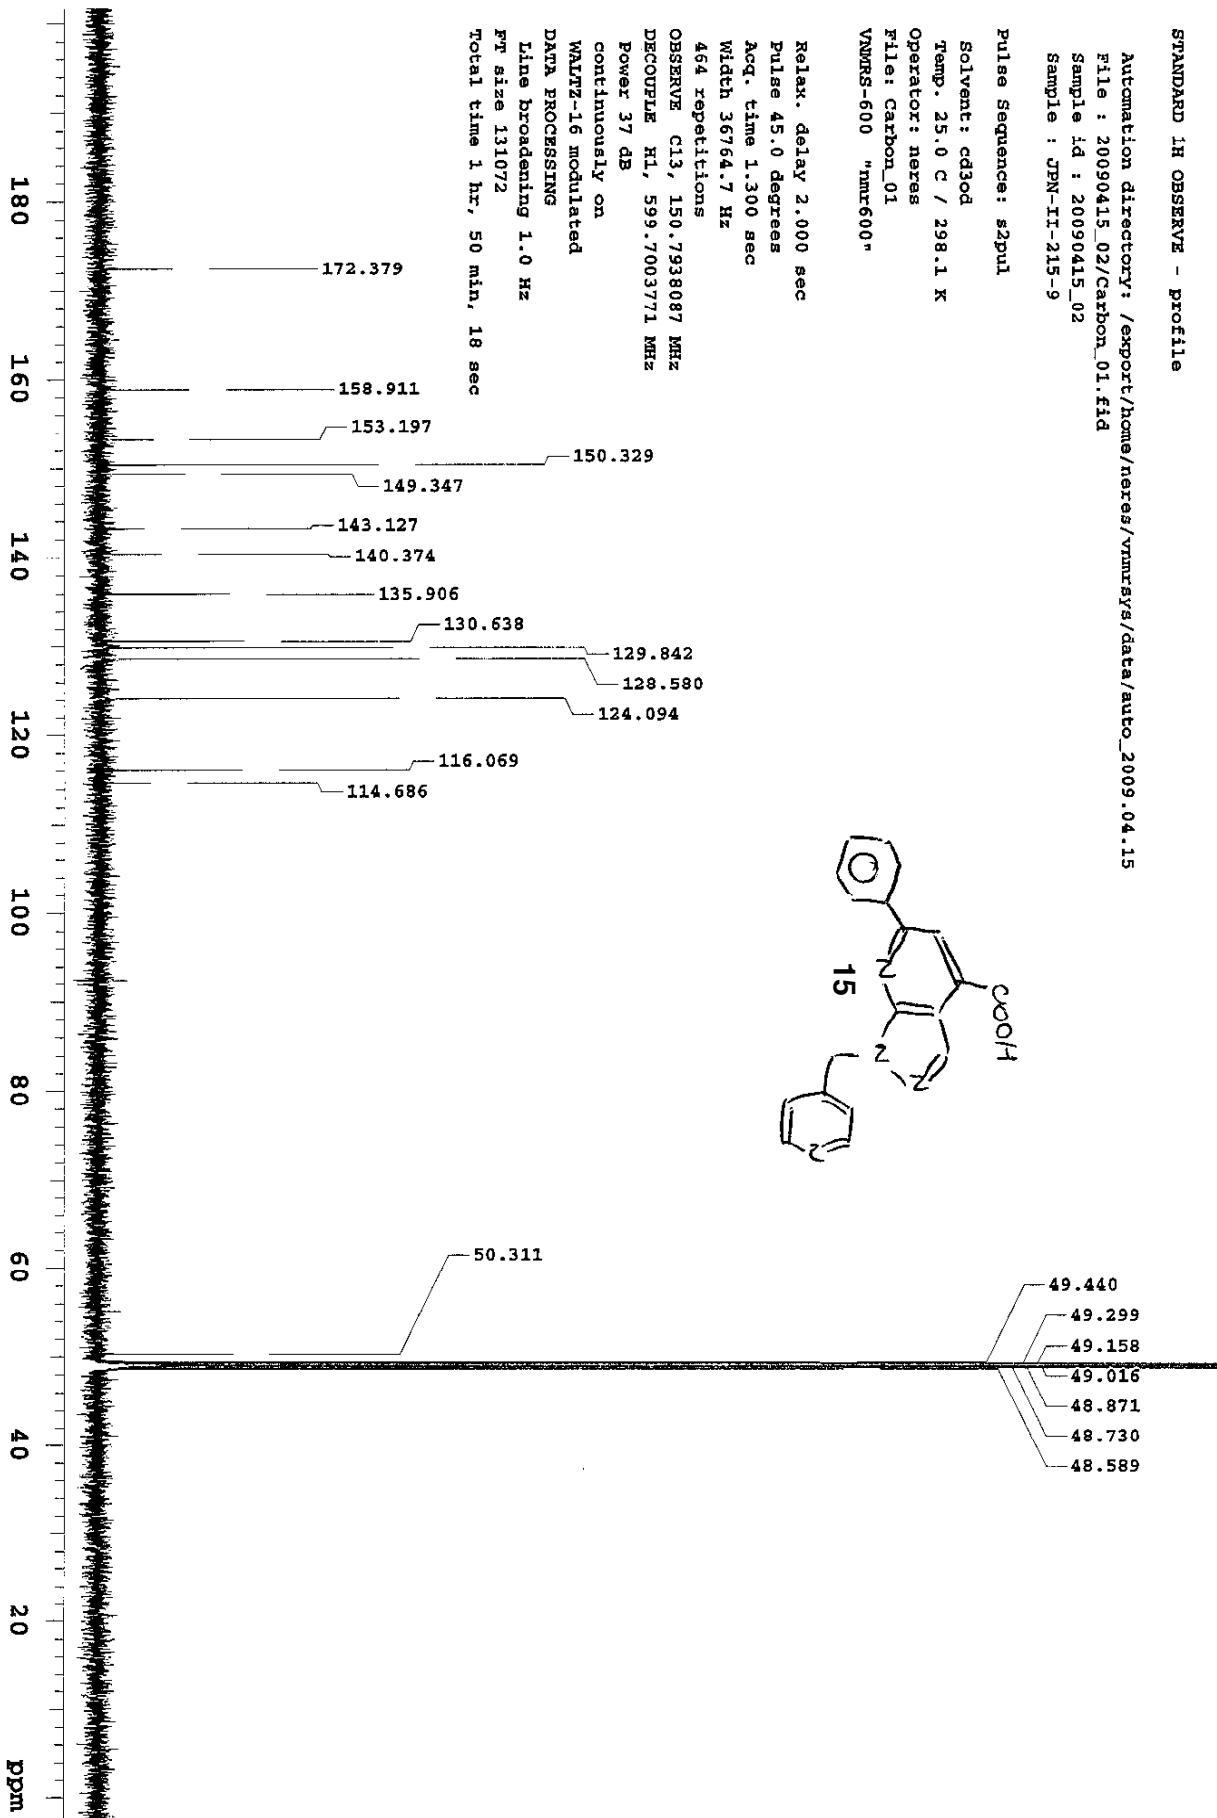

JPN-III-125-1  
DMSO-d6  
400 MHz

8.497  
8.483  
8.291  
8.086  
7.771  
7.513  
7.177  
7.141  
7.126

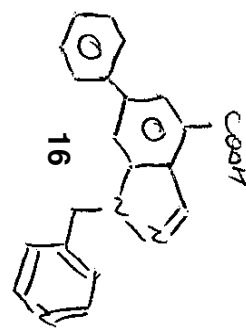

5.869

2.539  
2.509  
2.504  
2.500  
2.495  
2.491

10.0  
9.5  
9.0  
8.5  
8.0  
7.5  
7.0  
6.5  
6.0  
5.5  
5.0  
4.5  
4.0  
3.5  
3.0  
2.5  
2.0  
1.5  
1.0  
0.5  
0.0

f1 (ppm)

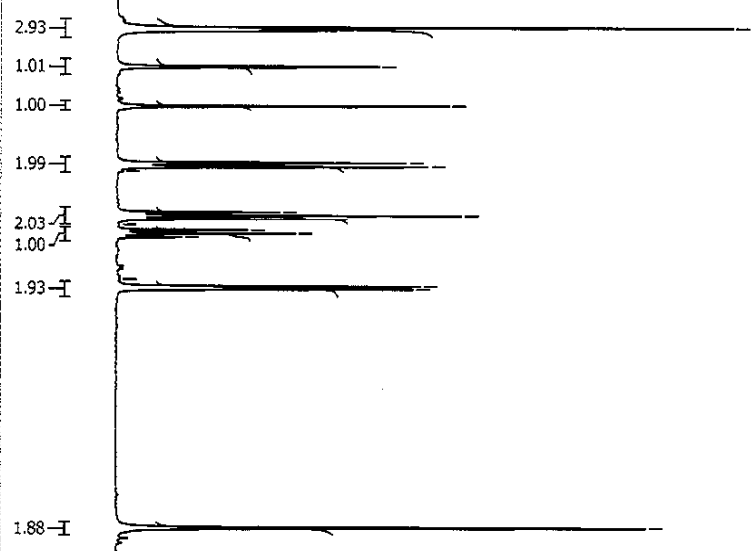

JPN-III-125-1  
DMSO-d6  
400 MHz

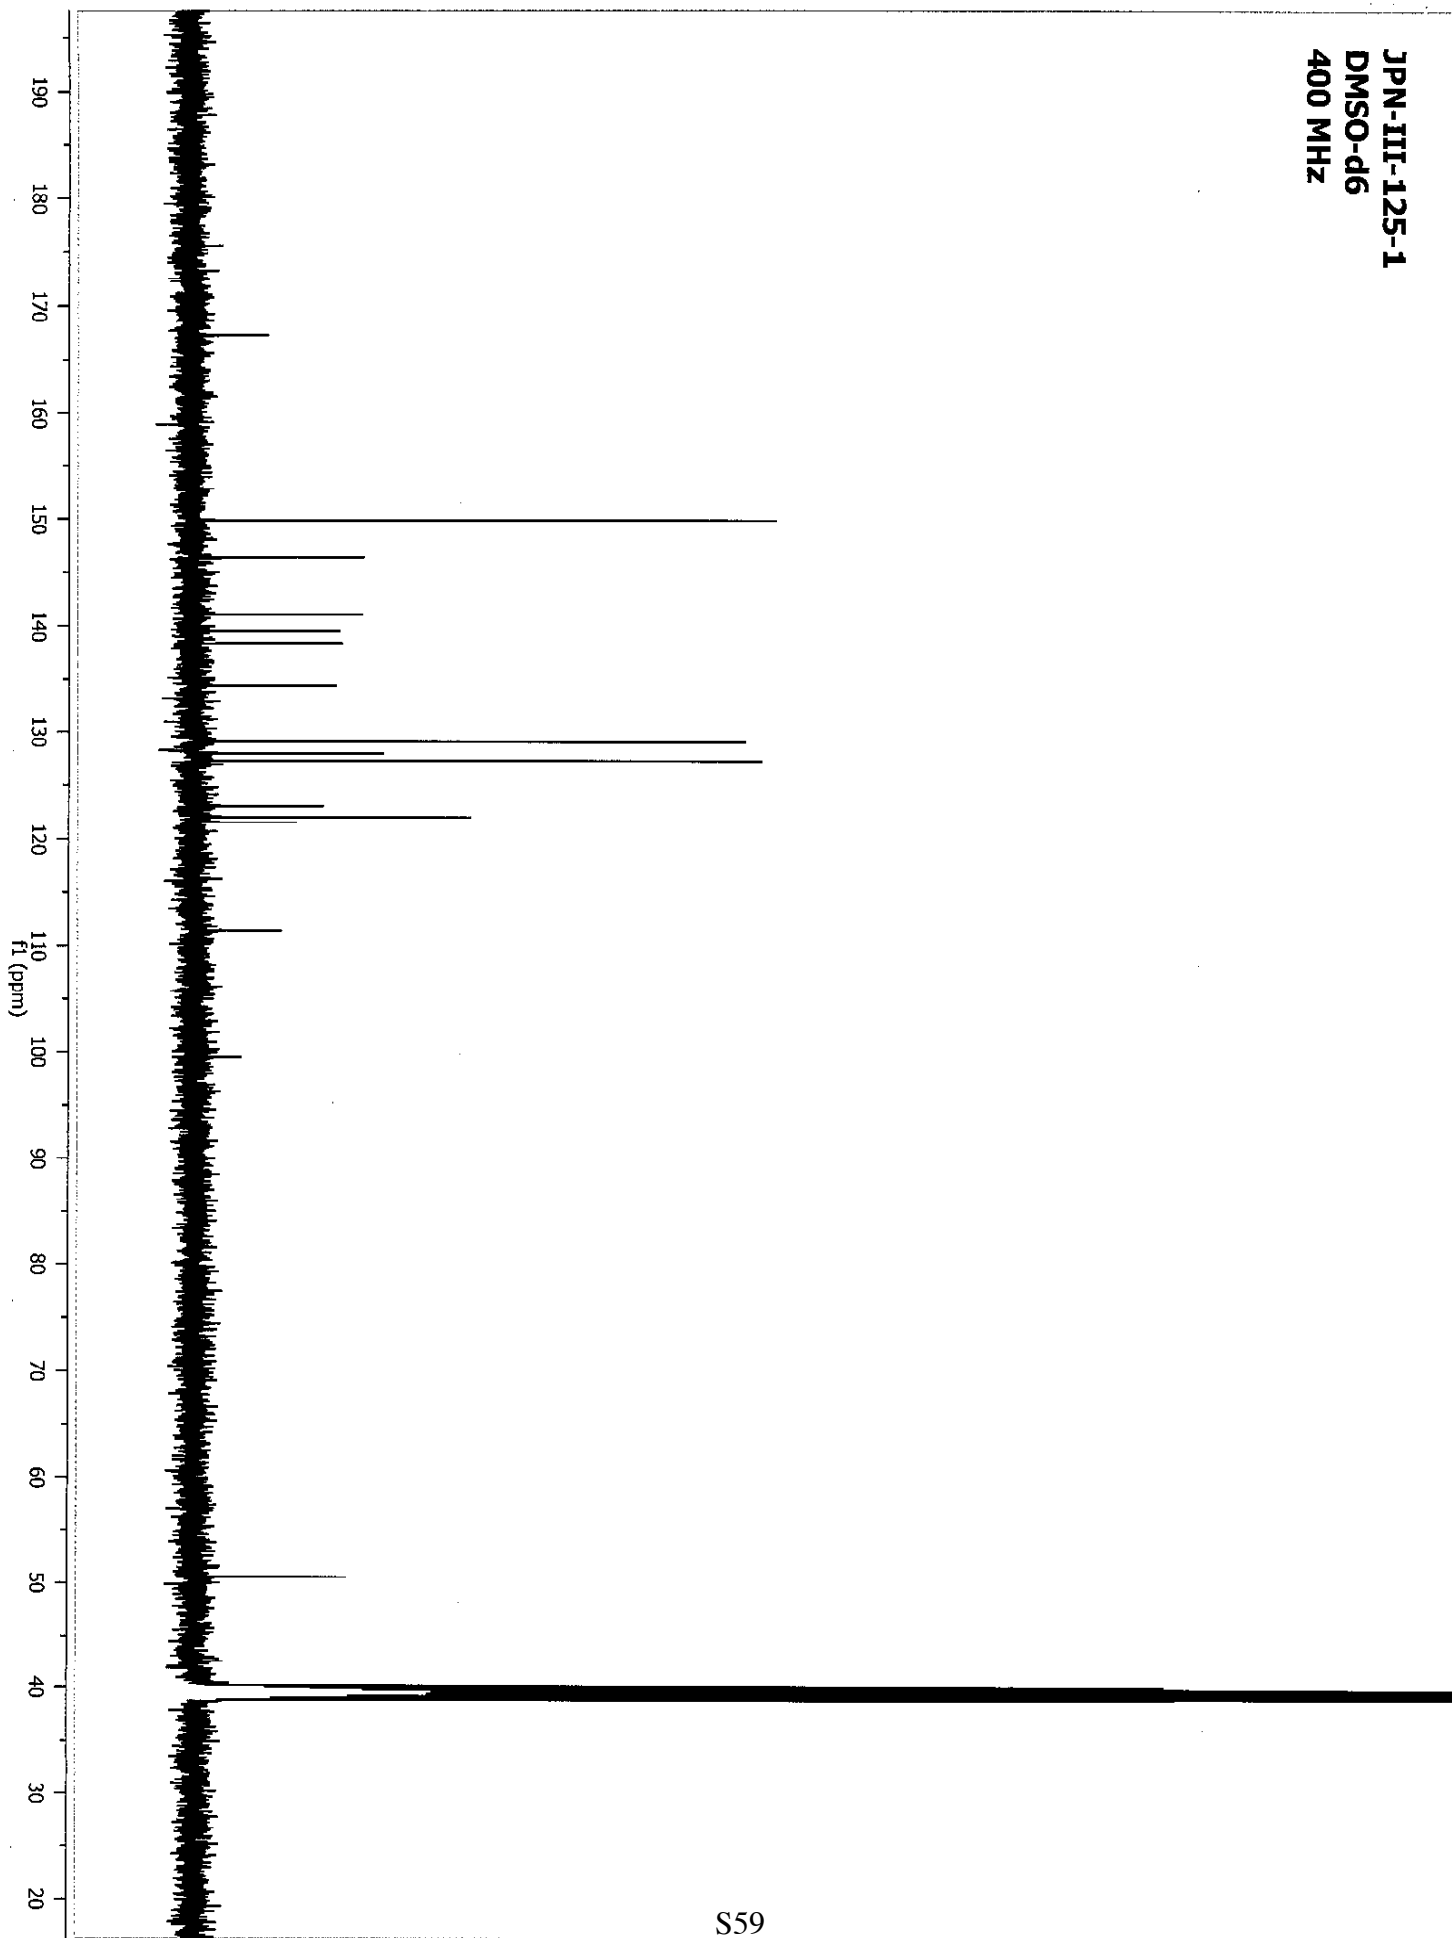

STANDARD 1H OBSERVE - profile

Automation directory: /export/home/neres/vnmrSYS/data/auto\_2009\_07.01  
File : 20090702\_01/Proton\_01.fid  
Sample id : 20090702\_01  
Sample : JPN-II-261

Pulse Sequence: s2pnl

Solvent: dmsd  
Temp. 25.0 C / 298.1 K  
Operator: neres  
File: Proton\_01  
VNMR5-600 "nmr600"

Relax. delay 1.000 sec  
Pulse 45.0 degrees  
Acq. time 2.049 sec  
Width 9615.4 Hz  
64 repetitions  
OBSERVE H1, 599.6978530 MHz  
DATA PROCESSING  
Line broadening 0.2 Hz  
FT size 65536  
Total time 3 min, 21 sec

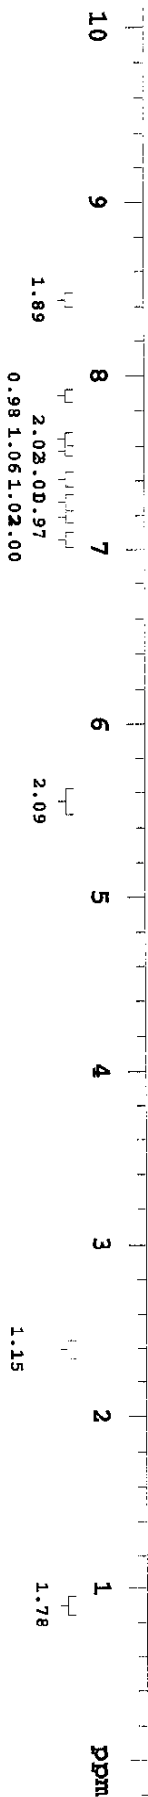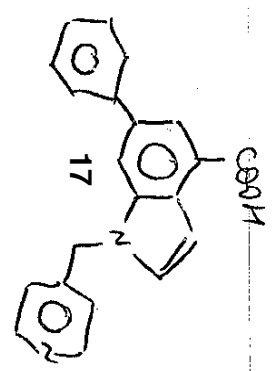

STANDARD 1H OBSERVE - profile

Automation directory: /export/home/neres/vnmrSYS/data/autoc\_2009.07.14  
file : 20090714\_03/Proton\_01.fid  
Sample id : 20090714\_03  
Sample : JPN-TI-275R

Pulse Sequence: s2pr1

Solvent: cdcl3  
Temp. 25.0 C / 298.1 K  
Operator: neres  
File: Proton\_01  
VNMRS-600 "nmr600"

Relax. delay 1.000 sec  
Pulse 45.0 degrees  
Acq. time 2.049 sec  
Width 9615.4 Hz  
64 repetitions  
OBSERVE H1, 599.6950144 MHz  
DATA PROCESSING  
Line broadening 0.2 Hz  
FT size 65536  
Total time 3 min, 21 sec

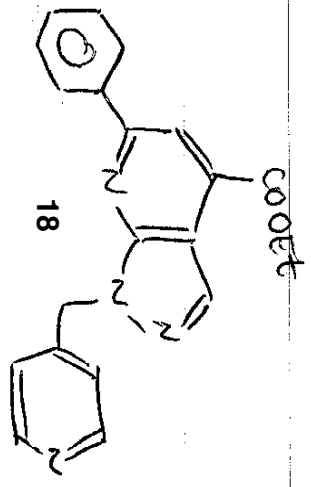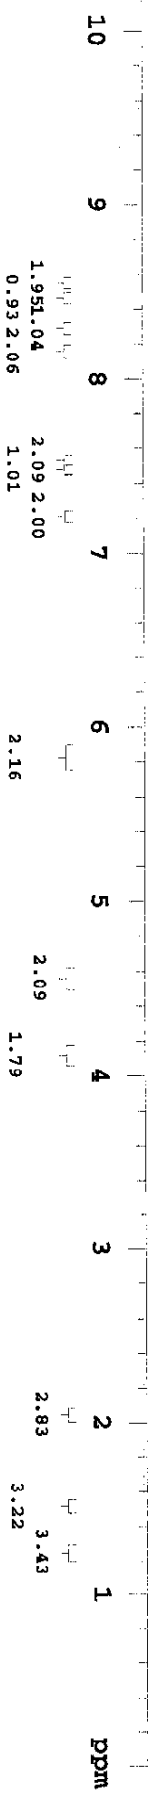

Automation directory: /export/home/nerees/.../data/auto\_2009\_01\_13  
File : 20090115\_02/Carbon\_01.fid  
Sample id : 20090115\_02  
Sample : IR-151\_f16-20

Pulse Sequence: s2pnl  
Solvent: cdcl3  
Temp. 25.0 C / 298.1 K  
Operator: neres  
File: Carbon\_01  
VNMR5-600 "nmr500"

Relax. delay 1.000 sec  
Pulse 45.0 degrees  
Acq. time 1.300 sec  
Width 36764.7 Hz  
96 repetitions  
OBSERVE C13, 150.7934142 MHz  
DECOUPLE H1, 599.6980143 MHz  
Power 42 dB  
continuously on  
WALTZ-16 modulated  
DATA PROCESSING  
Line broadening 0.5 Hz  
FT size 131072  
Total time 156 min, 43 sec

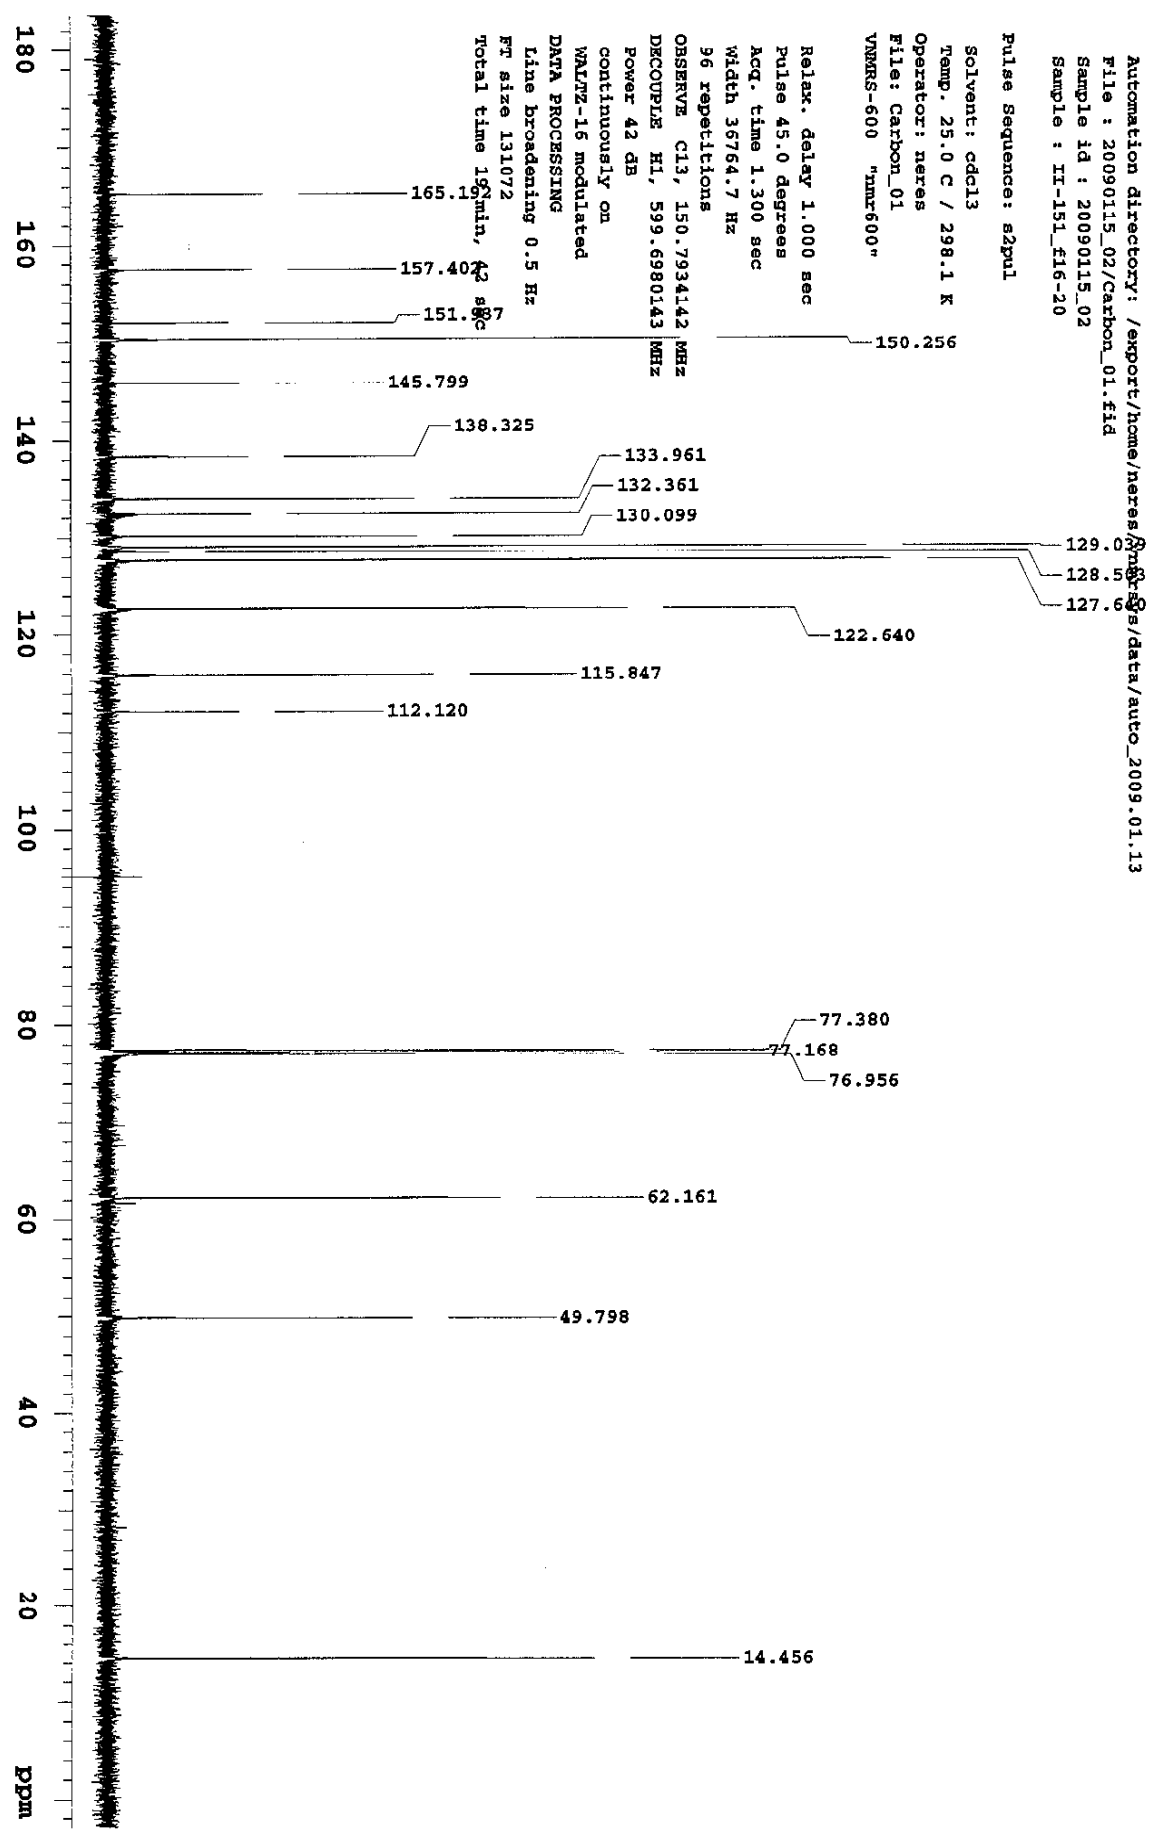

STANDARD 1H OBSERVE - profile

Automation directory: /export/home/neres/vnmrlogs/data/aut0\_2009\_07.16

File : 20090716\_03/Proton\_01.fid

Sample id : 20090716\_03

Sample : JPN-III-103\_F26-30

Pulse Sequence: s2pul

Solvent: cdcl3

Temp.: 25.0 C / 298.1 K

Operator: neres

File: Proton\_01

VNMRS-600 "nmr600"

Relax. delay 1.000 sec

Pulse 45.0 degrees

Acq. time 2.049 sec

Width 9615.4 Hz

64 repetitions

OBSERVE H1, 599.6950144 MHz

DATA PROCESSING

Line broadening 0.2 Hz

FT size 65536

Total time 3 min, 21 sec

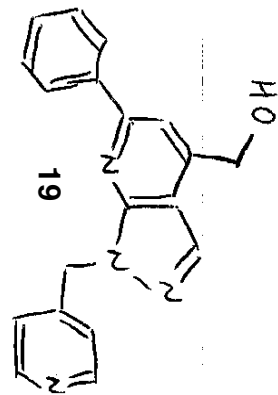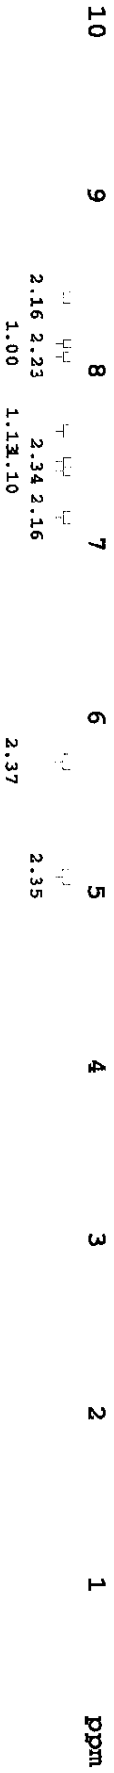

STANDARD 1H OBSERVE - profile  
STANDARD 1H OBSERVE - profile

Automation directory: /export/home/neres/vnmrSYS/data/auto\_2009.07.16  
File : 20090716\_03/Carbon\_01.fid  
Sample id : 20090716\_03  
Sample : JPN-III-103\_f26-30

Pulse Sequence: s2pul

Solvent: cdcl3  
Temp. 25.0 C / 298.1 K  
Operator: nerres  
File: Carbon\_01  
VNMRS-600 "nmr600"

Relax. delay 1.000 sec  
Pulse 45.0 degrees  
Acq. time 1.300 sec  
Width 35764.7 Hz  
352 repetitions  
OBSERVE C13, 150.7934098 MHz  
DECOUPLE H1, 599.6980143 MHz  
Power 42 dB  
continuously on  
WALTZ-16 modulated  
DATA PROCESSING  
Line broadening 0.5 Hz  
FT size 131072  
Total time 38 min, 29 sec

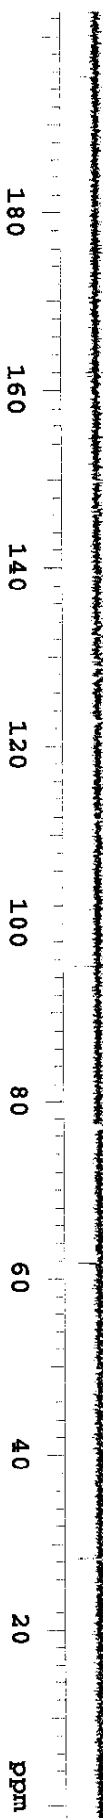



STANDARD 1H OBSERVE - PROFILE

Automation directory: /export/home/nereis/vnmrSYS/data/auto\_2009.07.16  
File : 20090716\_01/Proton\_01.fid  
Sample id : 20090716\_01  
Sample : JPN-II-299\_E30-49

Pulse Sequence: s2pul

Solvent: cdcl3  
Temp. 25.0 C / 298.1 K  
Operator: nereis  
File: Proton\_01  
VNMRS-600 "nmr600"

Relax. delay 1.000 sec  
Pulse 45.0 degrees  
Acq. time 2.049 sec  
Width 9615.4 Hz  
64 repetitions  
OBSERVE H1, 599.6950144 MHz  
DATA PROCESSING  
Line broadening 0.2 Hz  
Fw size 65536  
Total time 3 min, 21 sec

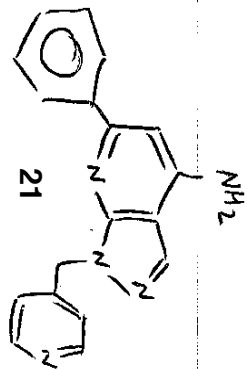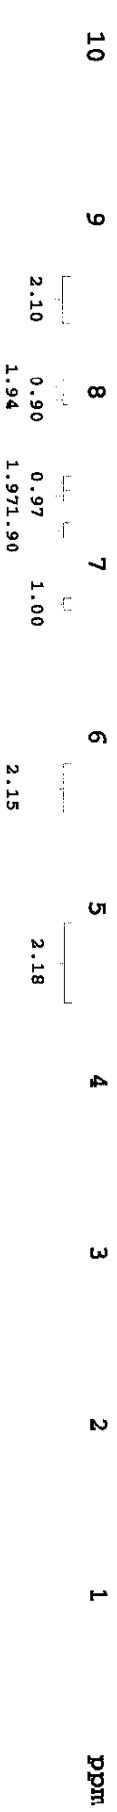

STANDARD 1H OBSERVE - profile

Automation directory: /export/home/nere/wnmr5ys/data/auto\_2009.08.01  
File : 20090801\_01/Proton\_01.f1d  
Sample id : 20090801\_01  
Sample : JPN-TIT-113-1

Pulse Sequence: s2pul

Solvent: cd3od

Temp. 25.0 C / 298.1 K

Operator: neres

File: Proton\_01

VMRS-600 "nmr600"

Relax. delay 1.000 sec

Pulse 45.0 degrees

Acq. time 2.049 sec

Width 9615.4 Hz

64 repetitions

OBSERVE H1, 599.6908604 MHz

DATA PROCESSING

Line broadening 0.2 Hz

FW size 65536

Total time 3 min, 21 sec

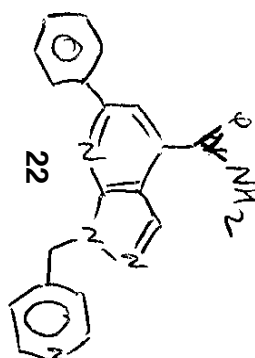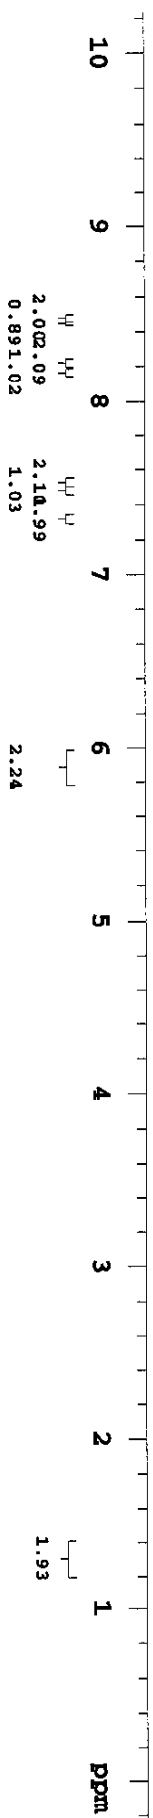

Automation directory: /export/home/neres/vnmrsys/data/auto\_2009\_08\_01  
File : 20090801\_01/Carbon\_01.fid  
Sample id : 20090801\_01  
Sample : JPN-IRI-113-1

Pulse Sequence: s2pul  
Solvent: cd3cd  
Temp. 25.0 C / 298.1 K  
Operator: neres  
File: Carbon\_01  
VNMRS-600 "nmr600"

Relax. delay 1.000 sec  
Pulse 45.0 degrees  
Acq. time 1.300 sec  
Width 36764.7 Hz  
1000 repetitions  
OBSERVE C13, 150.7921713 MHz  
DECUPLE H1, 599.6938627 MHz  
Power 42 dB  
continuously on  
WALTZ-16 modulated  
DATA PROCESSING  
Line broadening 1.0 Hz  
FM size 131072  
Total time 38 min, 29 sec

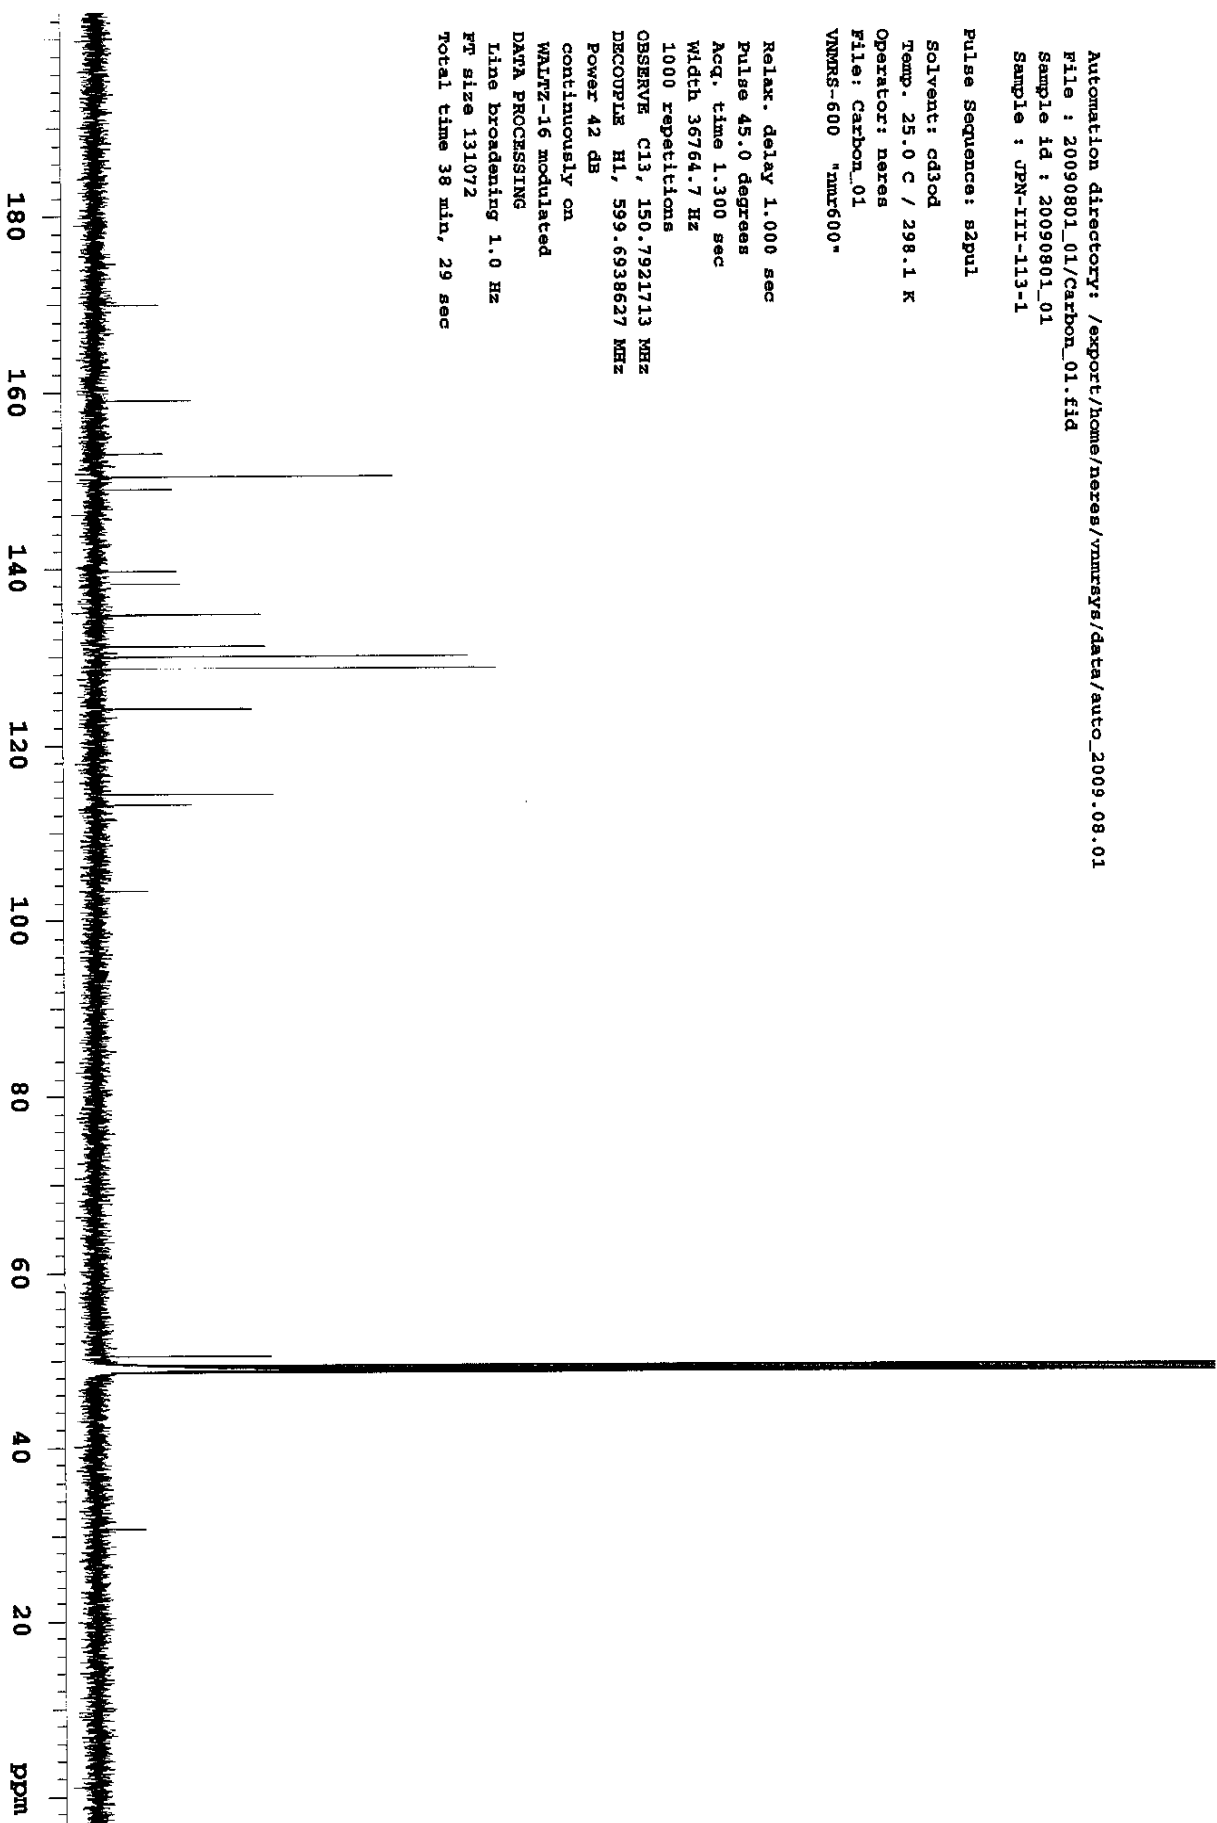

STANDARD 1H OBSERVE - PROFILE

JPN. II - 215 - 10

Automation directory: /export/home/nereis/vnmrsws/data/autoc\_2009.03.30  
File : 20090330\_09/Proton\_01.fid  
Sample id : 20090330\_09  
Sample : JPN-II-215-10

Pulse Sequence: s2pu1

Solvent: cd3od  
Temp. 25.0 C / 298.1 K  
Operator: neres  
File: Proton\_01  
VMRWS-600 "nmr600"

Relax. delay 1.0000 sec  
Pulse 45.0 degrees  
Acq. time 2.049 sec  
Width 9615.4 Hz  
64 repetitions  
OBSERVE H1, 599.6973745 MHz  
DATA PROCESSING  
Line broadening 0.2 Hz  
FT size 65536  
Total time 3 min, 21 sec

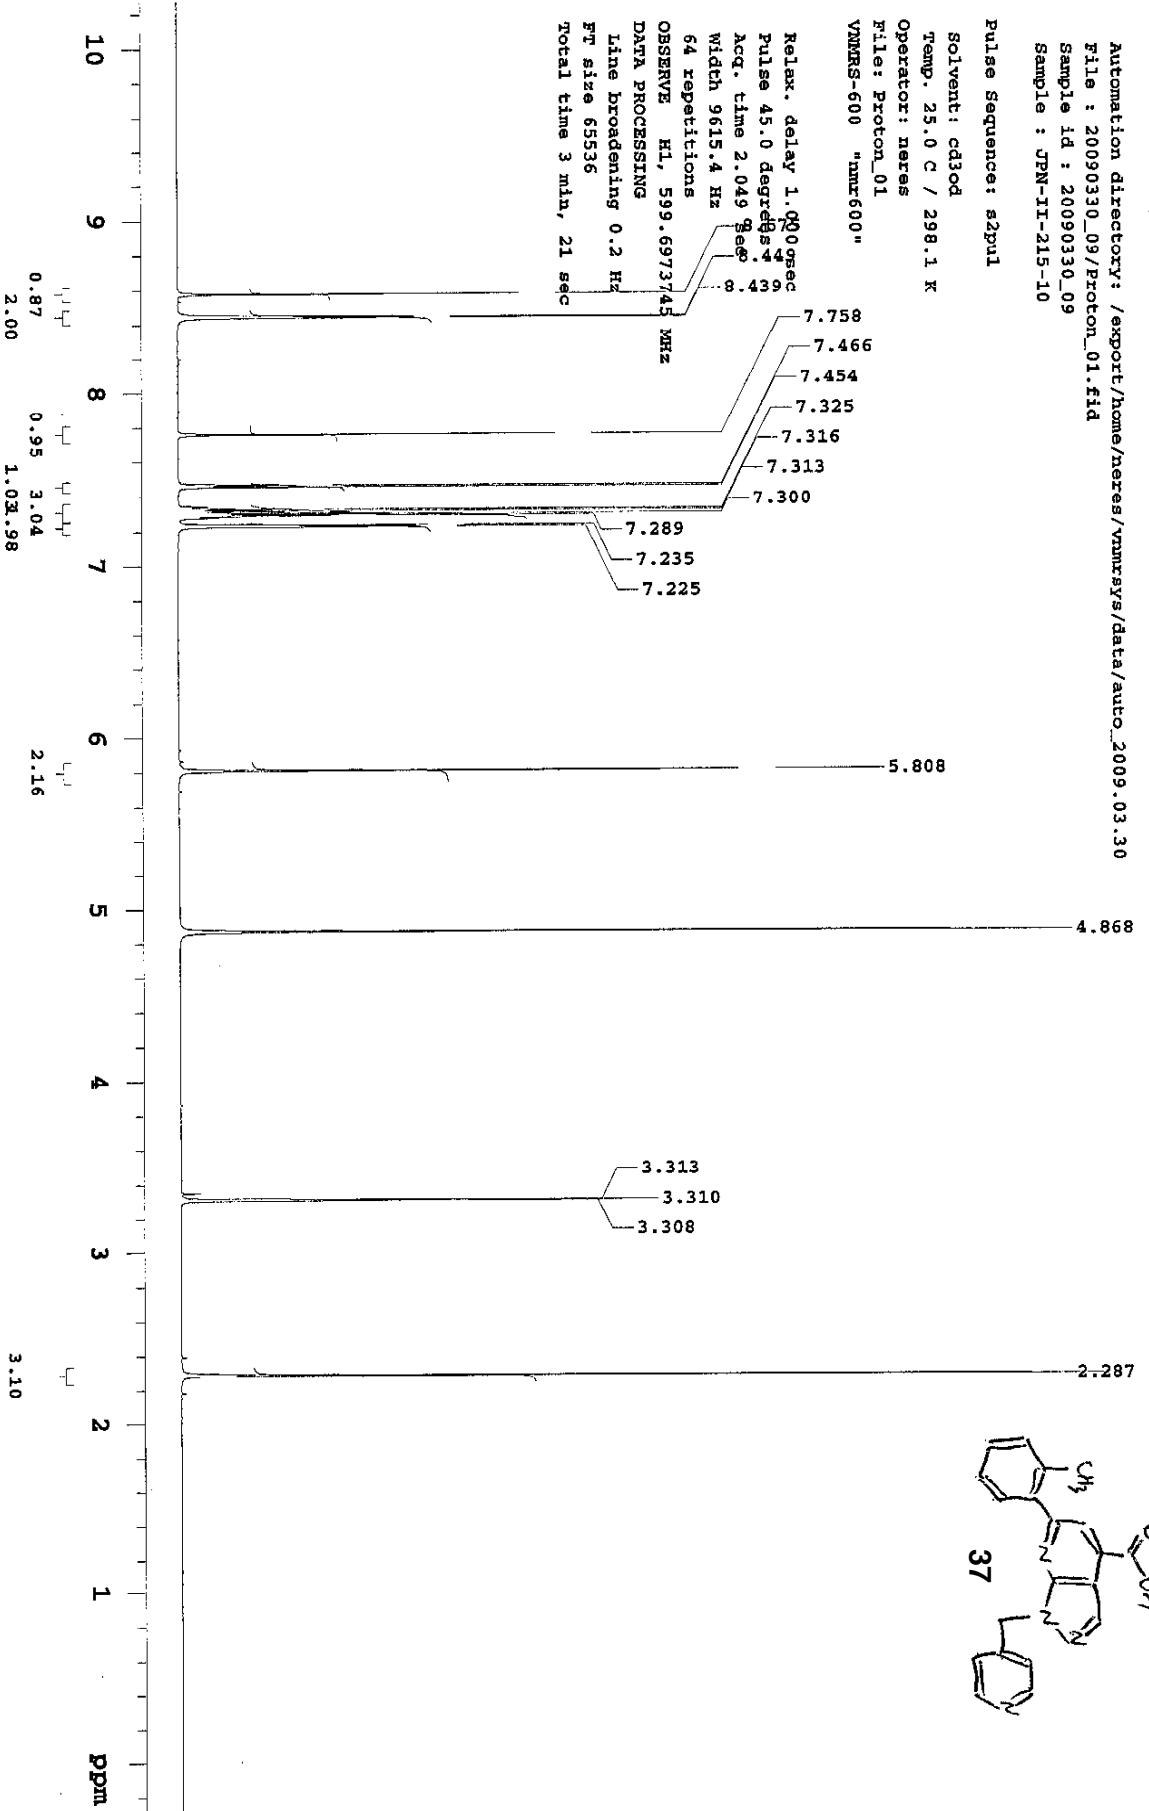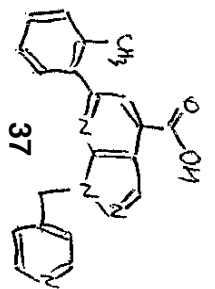

STANDARD 1H OBSERVE - profile

Automation directory: /export/home/engel313/vnmrSYS/data/auto\_2009.08.27

File : CAE-I-40\_6b\_200908270101.fid

Sample id : CAE-I-40\_6b\_2009082701

Sample : CAE-I-40\_6b

Pulse Sequence: zgpg30

Solvent: dmsc + ~~swa~~ D<sub>2</sub>O

Temp. 25.0 C / 298.1 K

Operator: engel313

File: CAE-I-40\_6b\_200908270101

VNMR5-600 "nmr600"

Relax. delay 1.000 sec  
 Pulse 45.0 degrees  
 Acq. time 2.049 sec  
 Width 9615.4 Hz  
 64 repetitions  
 OBSERVE H1, 599.6913344 MHz  
 DATA PROCESSING  
 Line broadening 0.2 Hz  
 FT size 65536  
 Total time 3 min, 21 sec

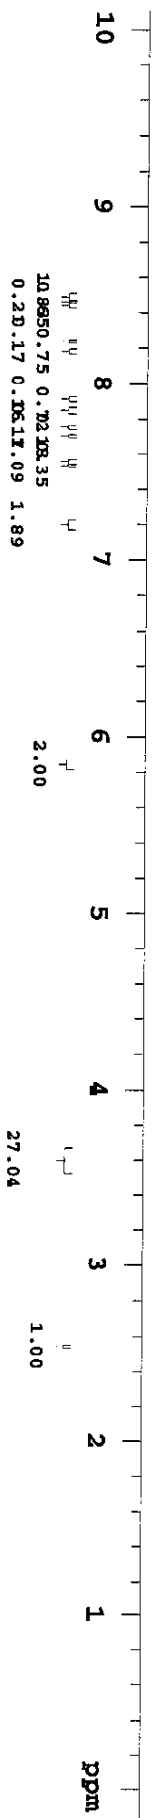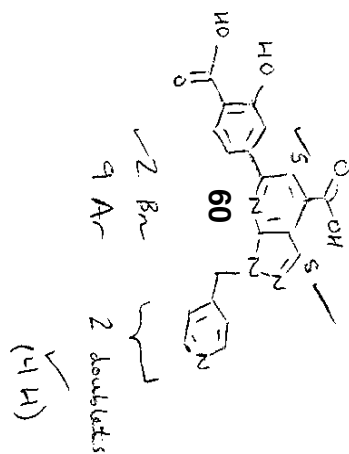

Automation directory: /export/home/pfu/vnmrSYS/data/auto.2010.03.04\_01

File : exp

Sample id : tmpstudy

Sample : pf-I-058-p

Pulse Sequence: s2pul

Solvent: dmsc

Temp: 25.0 C / 298.1 K

Operator: pfu

VNMR5-600 "nmr600"

Relax. delay 1.000 sec

Pulse 45.0 degrees

Acq. time 2.049 sec

Width 9615.4 Hz

52 repetitions

OBSERVE H1, 599.6913391 MHz

DATA PROCESSING

Line broadening 0.2 Hz

FT size 65536

Total time 3 min, 21 sec

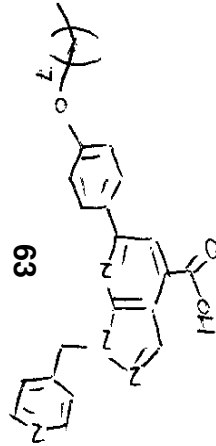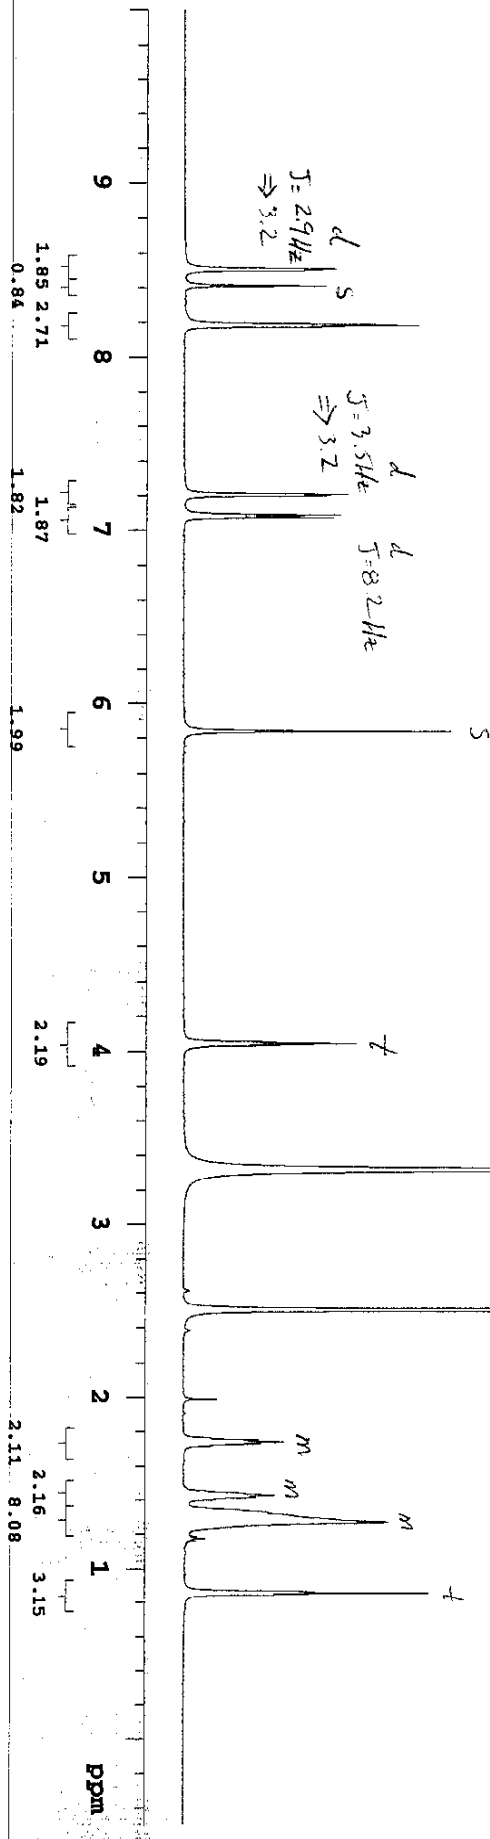

pf-I-058-p-C13

Sample Name:

pf-I-058-p-C13

Data Collected on:

nmr6003-vnmr5600

Archive directory:

/data/pfu

Sample directory:

20111121\_pf-I-058-p-C13\_112211

Fidfile: pf-I-058-p-C13\_112211

Pulse Sequence: CARRBON (s2pu1)

Solvent: dmsd

Data collected on: Nov 21 2011

Temp. 25.0 C / 298.1 K

Operator: pfu

Relax. delay 1.000 sec

Pulse 45.0 degrees

Acq. time 0.865 sec

Width 37878.8 Hz

24000 repetitions

OBSERVE C13, 150.7884837 MHz

DECUPLE H1, 599.6780622 MHz

Power 36 db

continuously on

WALTZ-16 modulated

DATA PROCESSING

Line broadening 0.5 Hz

FT size 85536

Total time 12 hr, 26 min

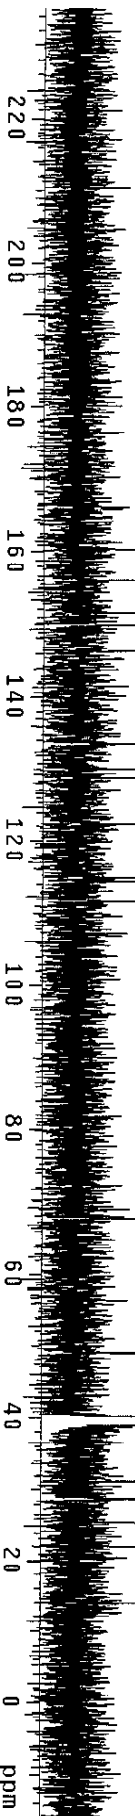

STANDARD 1H OBSERVE - profile

Automation directory: /export/home/pfu/vnmrSYS/data/auto\_2010.02.05

File: pf-I-042-p\_201002050101.fid

Sample id: pf-I-042-p\_2010020501

Sample: pf-I-042-p

Pulse Sequence: s2pul

Solvent: cd3od

Temp. 25.0 C / 298.1 K

Operator: pfu

File: pf-I-042-p\_201002050101

VNMRS-600 "nmr600"

Relax. delay 1.000 sec

Pulse 45.0 degrees

Acq. time 2.049 sec

Width 9615.4 Hz

16 repetitions

OBSERVE H1, 599.6908586 MHz

DATA PROCESSING

Line broadening 0.2 Hz

FW size 65536

Total time 0 min, 55 sec

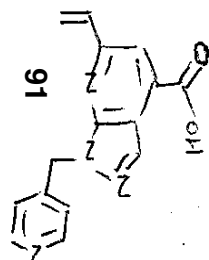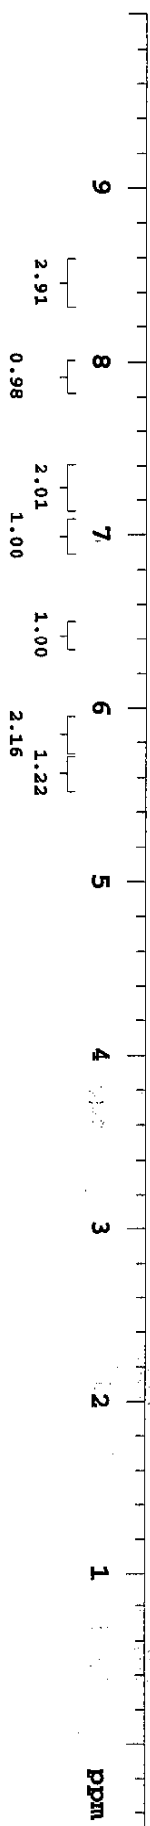



pf-I-036-p-C13

Sample Name:

pf-I-036-p-C13

Data Collected on:

nmr003-vhmr600

Archive directory:

/data/pfu

Sample directory:

20111114\_pf-I-036-p-C13\_01

Fidfile: pf-I-036-p-C13\_CARBON\_01

Pulse Sequence: CARRON (szpu1)

Solvent: d2o

Data collected on: Nov 14 2011

Temp: 25.0 C / 298.1 K

Operator: pfu

Relax. delay 1.000 sec

Pulse 45.0 degrees

Acq. time 0.865 sec

Width 37878.8 Hz

24000 repetitions

OBSERVE C13, 150.7879806 MHz

DECUPLE H1, 509.6767549 MHz

Power 42 db

continuously on

WALTZ-16 modulated

DATA PROCESSING

Line broadening 0.5 Hz

FT size 65536

Total time 12 hr, 26 min

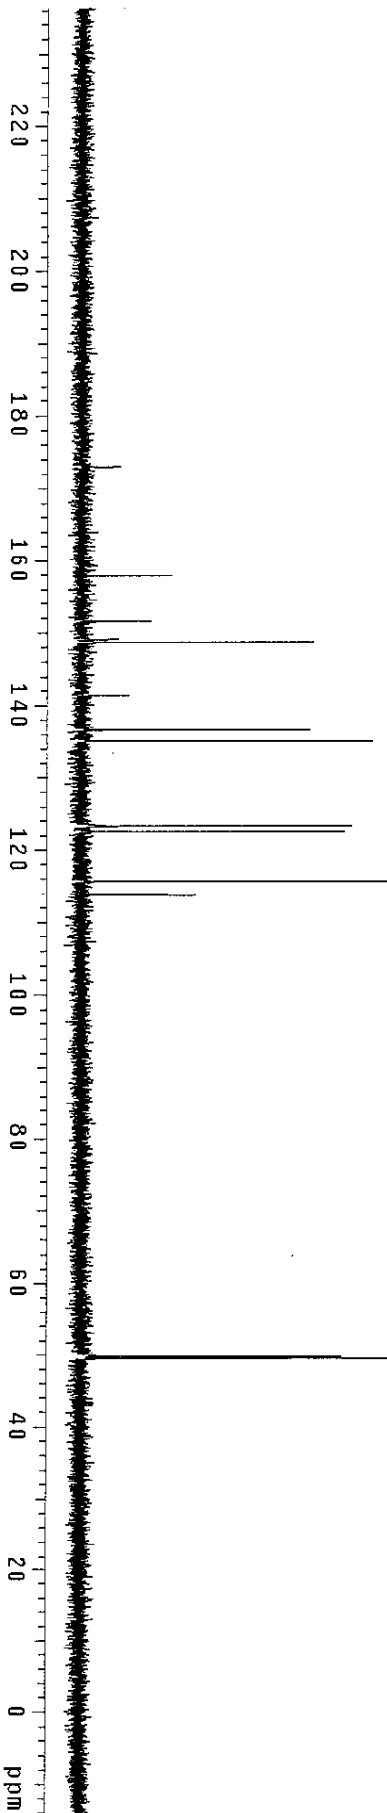

STANDARD 1H OBSERVE - profile

Automation directory: /export/home/nereas/vnmrSYS/data/auto\_2009.05.02  
 File : 20090502\_02/Proton\_01.fid  
 Sample id : 20090502\_02  
 Sample : JPN-TI-241

Pulse Sequence: s2pul

Solvent: dmso

Temp. 25.0 C / 298.1 K

Operator: neres

File: Proton\_01

VNMRS-600 "vnmr600"

Relax. delay: 5.00 sec  
 Pulse 45.00 degrees  
 Acq. time 2.04 sec  
 Width 9615.4 Hz  
 64 repetitions  
 OBSERVE H1, 599.6978527 MHz  
 DATA PROCESSING  
 Line broadening 0.2 Hz  
 FT size 65536  
 Total time 3 min, 21 sec

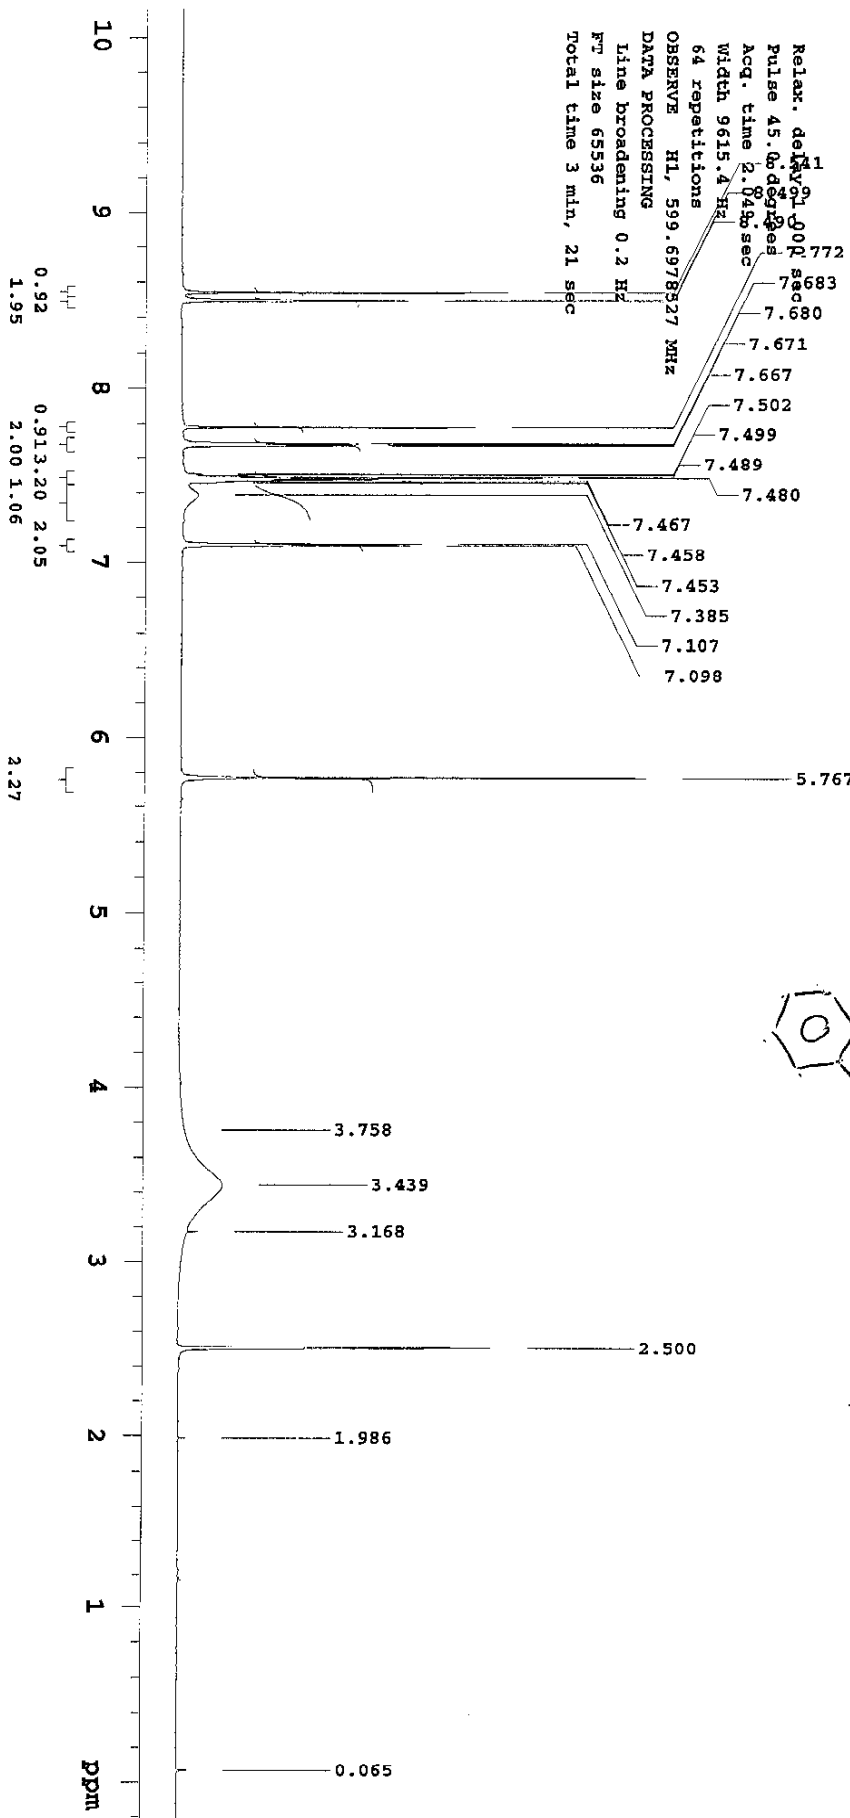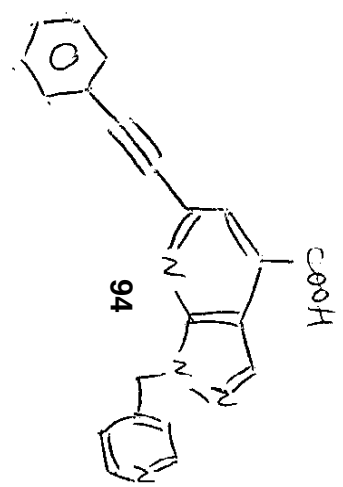

STANDARD 1H OBSERVE - profile

Automation directory: /export/home/neres/vnmrSYS/data/auto\_2009.04.11  
File : 20090411\_06/Proton\_01.fid  
Sample id : 20090411\_06  
Sample : UPN-II-219

Pulse Sequence: s2pul  
Solvent: cd3cd  
Temp. 25.0 C / 298.1 K  
Operator: neres  
File: Proton\_01  
VNMRS-600 "TMR600"

Relax. delay 1.000 sec  
Pulse 45.0 degrees  
Acq. time 2.049 sec  
Width 9615.4 Hz  
64 repetitions  
OBSERVE H1, 599.6973745 MHz  
DATA PROCESSING  
Line broadening 0.2 Hz  
Fw size 65536  
Total time 3 min, 21 sec

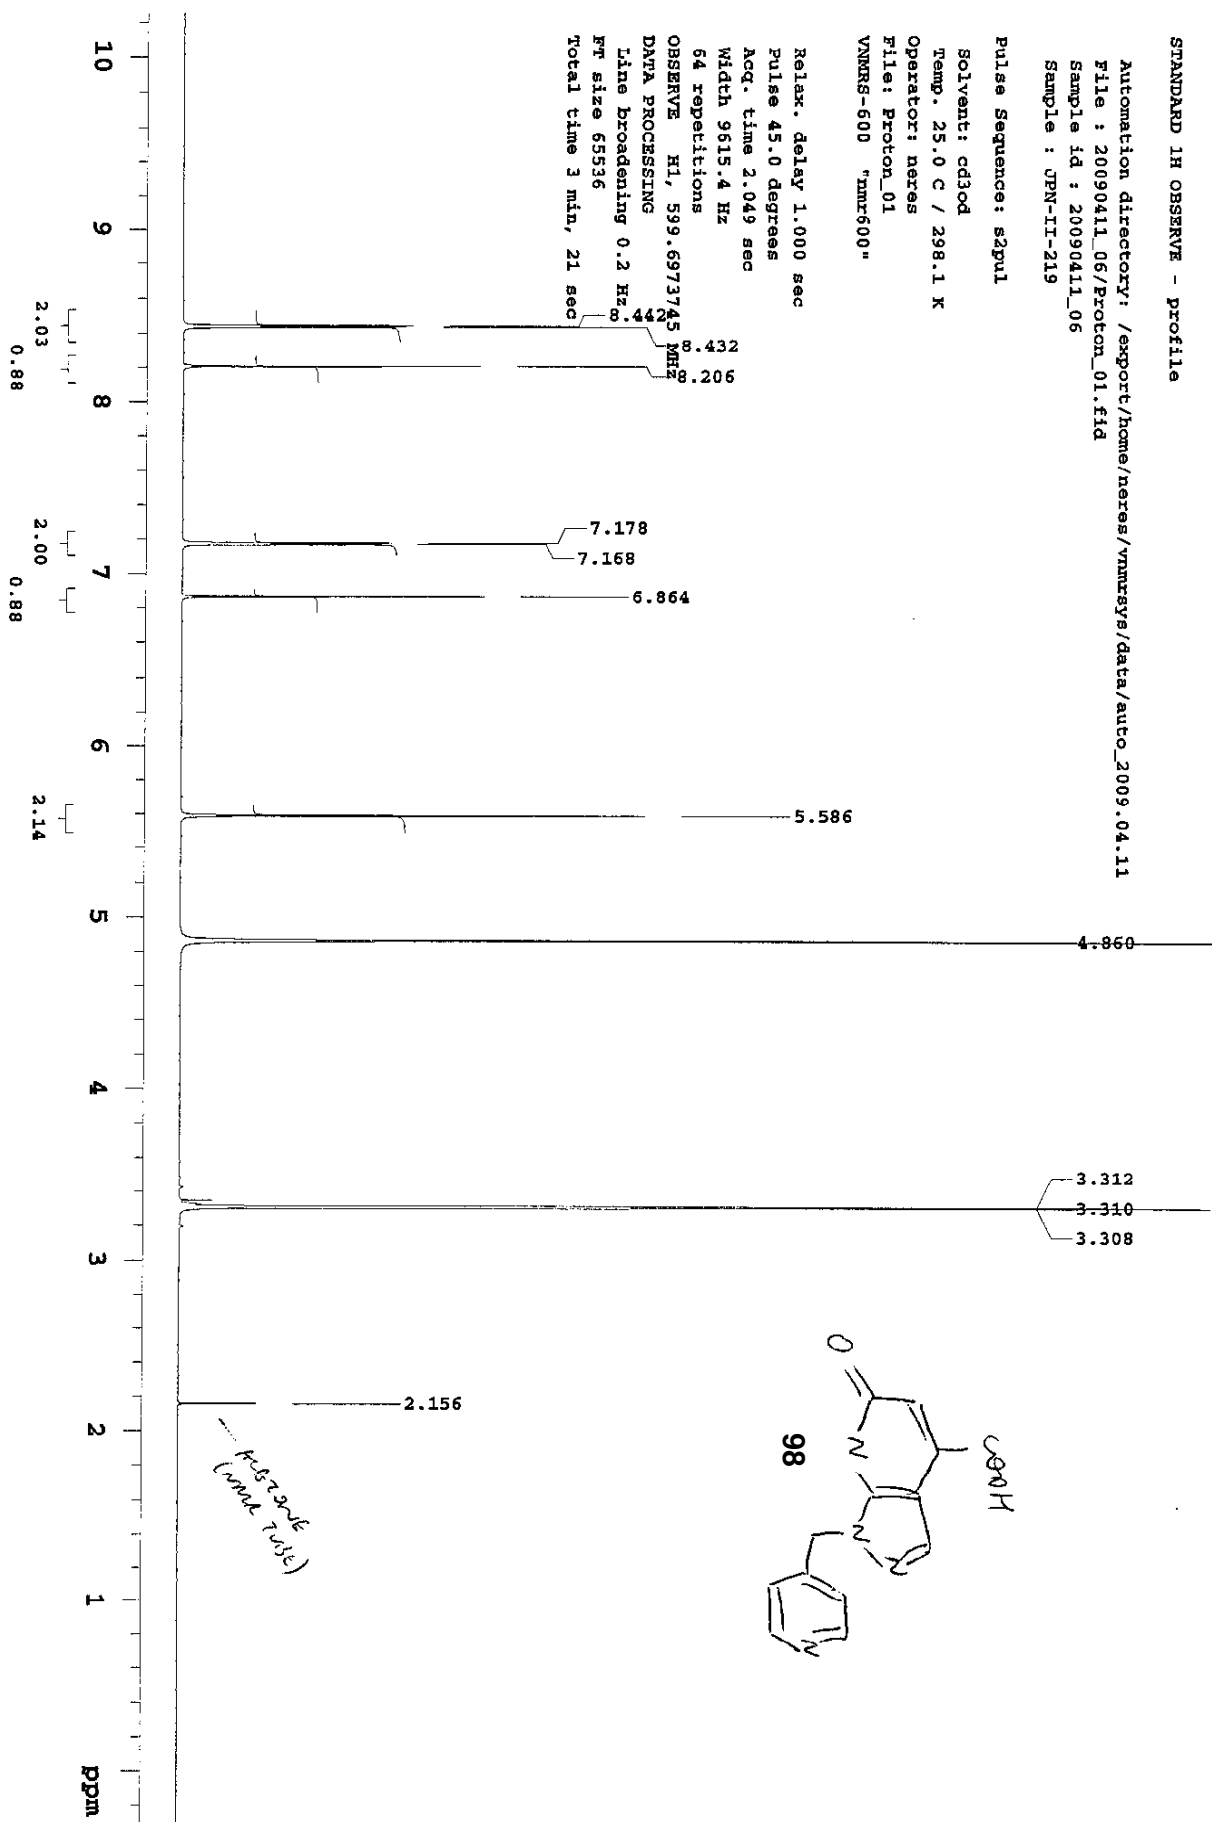

STANDARD 1H OBSERVE - profile

Automation directory: /export/home/neres/vnmrSYS/data/auto\_2009.04.11  
File : 20090411\_08/Carbon\_01.fid  
Sample id : 20090411\_08  
Sample : JPN-IT-219

Pulse Sequence: s2pul1

Solvent: cd3od  
Temp. 25.0 C / 298.1 K  
Operator: neres  
File: Carbon\_01  
VNMRS-600 \*nmr600\*

Relax. delay 1.000 sec  
Pulse 45.0 degrees  
Acq. time 1.300 sec  
Width 36764.7 Hz  
1248 repetitions

OBSERVE C13, 150.7938099 MHz  
DECOUPLE H1, 599.7003771 MHz  
Power 42 dB  
continuously on  
WALTZ-16 modulated

DATA PROCESSING  
Line broadening 0.8 Hz  
FT size 131072  
Total time 1 hr, 16 min, 58 sec

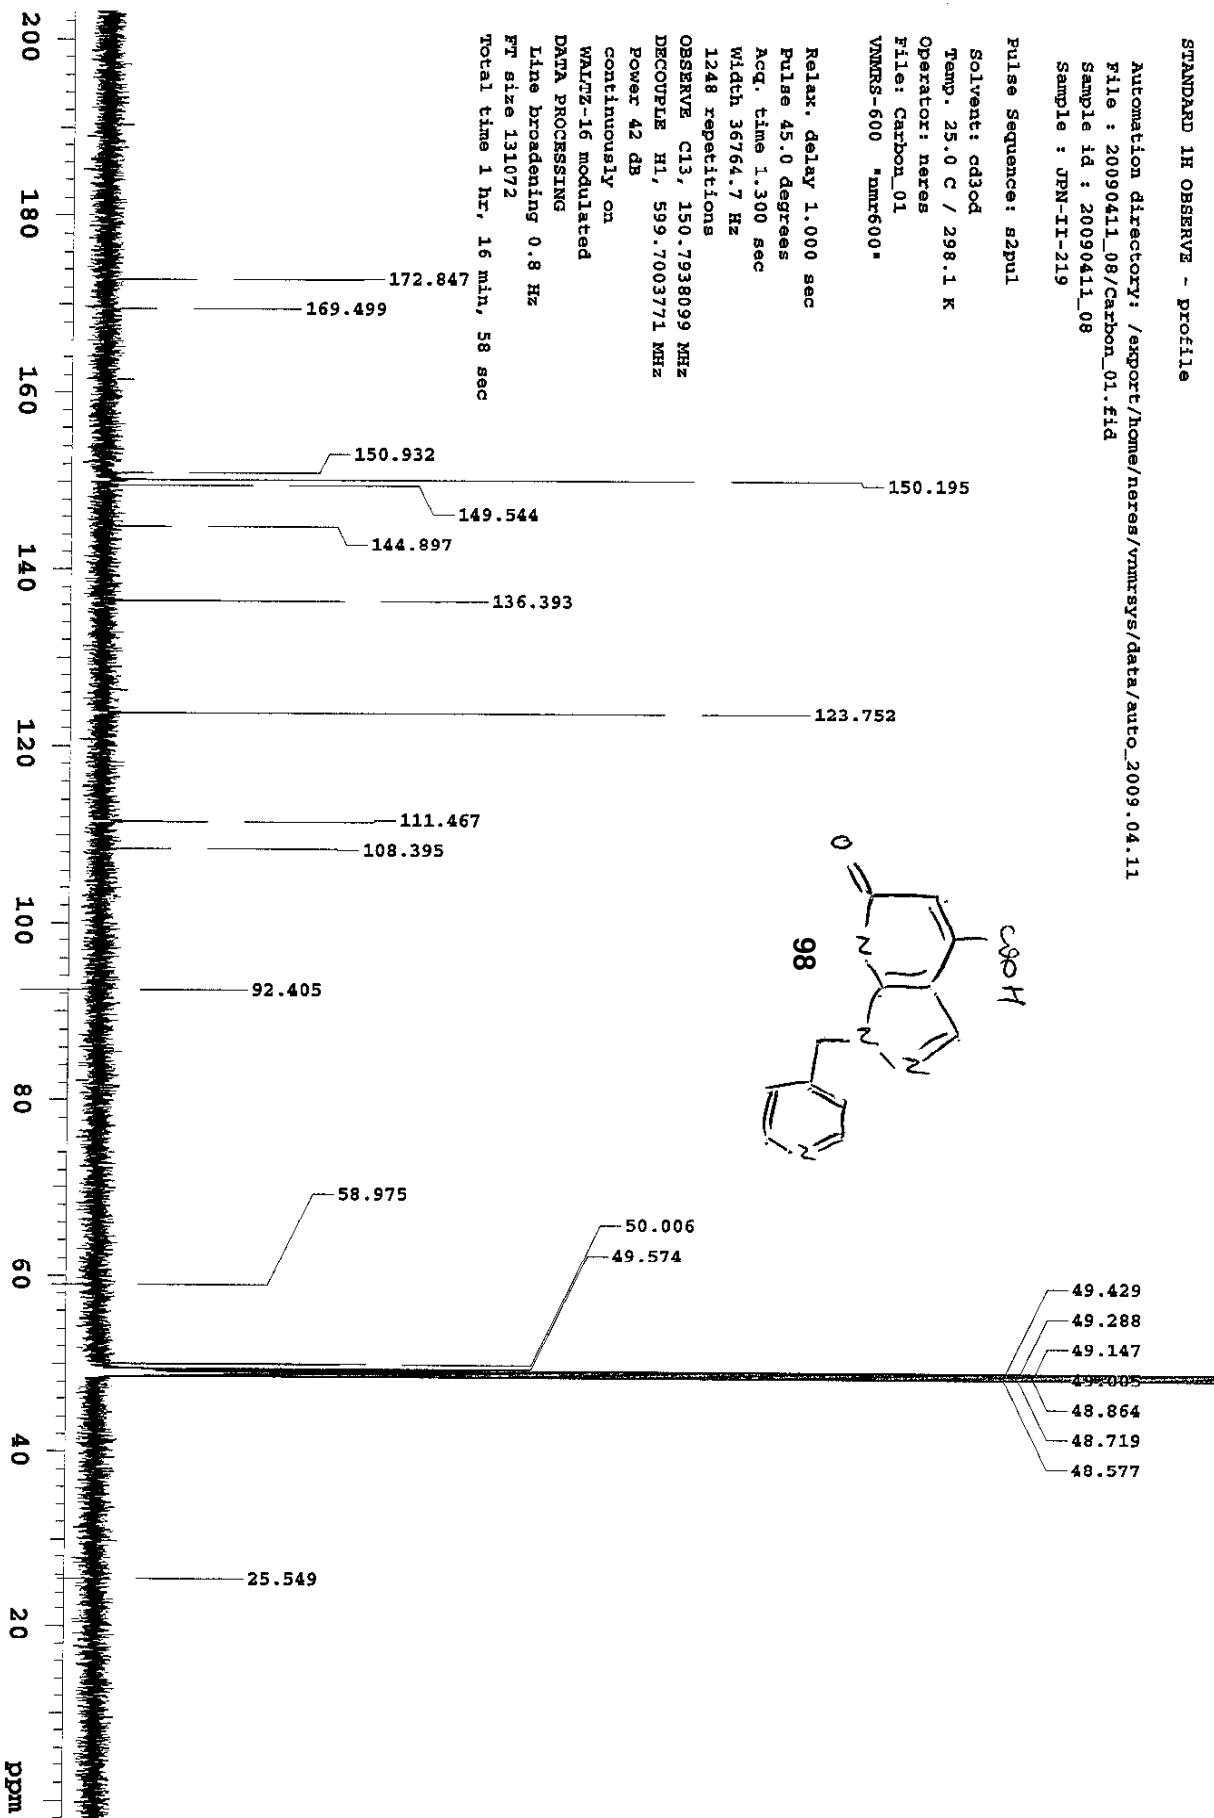

Supplement: NIHMS451179-supplement-1_si_001.pdf [file NIHMS451179-supplement-1_si_001.pdf]
